# Supplementary material for: 3d Pharamacophore Model, Virtual Screening, Binding Affinity and Molecular Dynamics Studies of Potential Anticancerous Compounds Against Mammalian Target Rapamycin
Source: Research Square preprint supplement (doi:10.21203/rs.3.rs-3100361/v1), 2023-07-10
Supplement: Supplementary file 1 [file 8d14c8b2f9b591113a2d7668.xlsx]

## Sheet: Sheet1
pubchem id	docking score	ligand name
363127	-11.167	Balsaminol A
5490349	-10.891	20-hydroxyresiniferol 9,13,-14-orthophenylacetate
493164	-10.628	Goniotetracin
177023	-10.609	helioxanthin
10264769	-10.567	Balsaminols C
354689	-10.298	taiwanin C
11546716	-9.858	Erycristagallin
5281801	-9.501	Erystagallin A
10423261	-9.498	Erysubin F
445154	-9.434	Erythrabissin-1
10406203	-8.812	Erythrabyssin II
10664858	-8.454	Erythro-austrobailignan-6
5204	-7.241	Escobarine A
513197	-7.233	Escobarine B
5280443	-7.217	Eupafolin
10063027	-7.209	Euparin
10247551	-7.197	Eupatorin
10575105	-7.189	Euxanthone
5280681	-7.155	Fangchinoline
442879	-7.133	Foveoglin A
440735	-7.128	Foveoglin B
5281702	-7.124	Friedelan-1,3-dione
3519897	-7.105	Friedelin
10065574	-7.101	Furomollugin
13940837	-7.071	Galbacin
11033908	-7.05	Galbelgin
-44254878	-7.046	Gallic acid
97214	-7.005	Garcinone C
641765	-6.964	Garcinone D
44254875	-6.963	Garcinone E
10088963	-6.936	Gartanin
5281296	-6.933	Genistein
150068	-6.879	Gigantecin
932	-6.86	Gitoxigenin
119039	-6.818	Gitoxin
96118	-6.782	taiwanin e
10937021	-6.773	Glacins A
10380681	-6.754	Glacins B
5281867	-6.753	G-Mangostin
10263500	-6.74	28-deoxonimbolide
5384941	-6.738	strophanthidin
5491730	-6.732	Alpha-Terpineol
10105653	-6.7	6-(2-Hydroxy-3-methyl-3-butenyl)-8-prenyl-eriodictyol
46880203	-6.687	6,8-Diprenyleriodictyol
177023	-6.68	6-alpha-hydroxyneopulchellin
10498462	-6.674	6'-desmethylthalifaboramine
10498462	-6.674	6-hydroxy-3-methoxytremetone
97332	-6.647	6-methoxy-tremetone
5281631	-6.642	6-oxo-pristimerol
12082492	-6.623	7,7''-dimethyllanaraflavone
549039	-6.582	7''-methylagathisflavone
234441	-6.543	candenatenin B
44254876	-6.535	8-epi-helenalin
442614	-6.521	glucostrophanthidin
5319813	-6.52	9-alpha-hydroxy-1-beta,10-alpha-epoxyparthenolide
5317747	-6.508	9-alpha-hydroxyparthenolide
688597	-6.507	9-beta-hydroxy-1-beta,10-alpha-epoxyparthenolide
101749	-6.504	9-beta-hydroxyparthenolide
1286	-6.483	2-acetylfuro-1,4-naphthoquinone
10450045	-6.466	Aculeatin A
10450921	-6.458	Aculeatin B
5375436	-6.454	Aculeatin E
107974	-6.442	Aculeatin F
5280961	-6.439	Aculeatol E
44254877	-6.396	Acuminatin
15838237	-6.39	Agathisflavone
2361	-6.378	Agladupol A
10336729	-6.376	Aglafolin
10336729	-6.376	Alkylresorcinol A
10449549	-6.368	Alkylresorcinol B
92180	-6.353	Alkylresorcinol C
9998380	-6.333	Allicin
6442251	-6.323	Ergolide
156517	-6.317	Asiatic acid
10472929	-6.315	Asimicin
97176	-6.295	Asimin
442670	-6.274	Asiminacin
5317284	-6.264	Asiminecin
6482487	-6.257	Asitrilobins A
13939326	-6.247	Asitrilobins B
5495926	-6.246	Balsaminapentaol A
72344	-6.171	Balsaminol B
321346	-6.148	Balsaminol F
10314441	-6.124	Balsaminols D
449093	-6.088	Balsaminols E
5281628	-6.043	Balsaminoside A
275196	-6.037	Cajanol
150893	-6.009	Benzoic acid
-10315196	-6.003	Benzoic acid alpha-L-arabinopyranosyl(1->6)-beta-D-glucopyranoside
160705	-5.996	Benzoic acid beta-D-glucopyranoside
100768	-5.969	Berberine
364109	-5.944	Bergenin
68077	-5.943	Beta-Caryophyllene
15281118	-5.942	Beta-Mangostin
6185	-5.938	Beta-sitosterol
11779478	-5.908	Beta-sitosterol-3-O-beta-D-glucoside
10761665	-5.881	Beta-sitosterol-3-O-glucoside
114703	-5.87	Betulin
5318889	-5.859	Betulinic acid
10062464	-5.854	Bigelovin
91110793	-5.84	Bisabolone
72732	-5.84	Bucidarasin A
9991528	-5.832	Bucidarasin B
5352005	-5.803	Bucidarasin C
9881423	-5.722	Bucidarasin D
10265831	-5.718	Bullatetrocin
64981	-5.718	Cabraleadiol
44606075	-5.678	Cabraleahydroxylactone
15478	-5.664	Cabralealactone
10453852	-5.655	Caffeic acid
10574	-5.639	Camphene
71454058	-5.618	Caracasine
-476856	-5.612	Caracasine acid
10445779	-5.595	Carvacrol
13422573	-5.593	Caulophyllogenin
-10338075	-5.553	Cauloside D
152430	-5.521	Celastrol
10144	-5.43	Chamaejasmine
4369270	-5.42	Cis-4-deoxyannoreticuin
348482	-5.415	candenatenin C
124219	-5.407	candenatenin D
2353	-5.404	Cis-Zeatin
-24893995	-5.244	Corosolic acid
-10445414	-5.2	Cucurbalsaminol A
10585660	-5.165	Cucurbita-5,23(E)-diene-3-beta,7-beta,25-triol
10354359	-5.123	Cucurbitacin A
6442294	-5.114	Cucurbitacin B
146093	-4.915	Cucurbitacin D
162334	-4.138	Cucurbitacin I
10827791	-3.164	Cucurbitacin Q
