# Supplementary material for: 3d Pharamacophore Model, Virtual Screening, Binding Affinity and Molecular Dynamics Studies of Potential Anticancerous Compounds Against Mammalian Target Rapamycin
Source: Research Square preprint supplement (doi:10.21203/rs.3.rs-3100361/v1), 2023-07-10
Supplement: Supplementary file 2 [file a8f2b4c557026283650ee449.xlsx]

## Sheet: Sheet1
ligand	Canonical SMILES	Formula	MW	#Heavy atoms	#Aromatic heavy atoms	Fraction Csp3	#Rotatable bonds	#H-bond acceptors	#H-bond donors	MR	TPSA	iLOGP	XLOGP3	WLOGP	MLOGP	Silicos-IT Log P	Consensus Log P	ESOL Log S	ESOL Solubility (mg/ml)	ESOL Solubility (mol/l)	ESOL Class	Ali Log S	Ali Solubility (mg/ml)	Ali Solubility (mol/l)	Ali Class	Silicos-IT LogSw	Silicos-IT Solubility (mg/ml)	Silicos-IT Solubility (mol/l)	Silicos-IT class	GI absorption	BBB permeant	Pgp substrate	CYP1A2 inhibitor	CYP2C19 inhibitor	CYP2C9 inhibitor	CYP2D6 inhibitor	CYP3A4 inhibitor	log Kp (cm/s)	Lipinski #violations	Ghose #violations	Veber #violations	Egan #violations	Muegge #violations	Bioavailability Score	PAINS #alerts	Brenk #alerts	Leadlikeness #violations	Synthetic Accessibility
(+)-Gallocatechin	Oc1cc2O[C@H](c3cc(O)c(c(c3)O)O)[C@H](Cc2c(c1)O)O	C15H14O7	306.27	22	12	0.2	1	7	6	76.36	130.61	1.47	0	0.93	-0.29	0.49	0.52	-2.08	2.57	0.00839	Soluble	-2.29	1.56	0.00508	Soluble	-1.56	8.42	0.0275	Soluble	High	No	No	No	No	No	No	No	-8.17	1	0	0	0	1	0.55	1	1	0	3.53
(2,4-cis and trans)-gigantecinone	CCCCCCCCCCCC[C@H]([C@H]1CC[C@@H](O1)[C@@H](CC[C@@H]([C@@H]1CC[C@H](O1)CCCCC[C@H]1OC(=O)[C@H](C1)CC(=O)C)O)O)O	C37H66O8	638.92	45	0	0.95	25	8	3	180.77	122.52	5.5	7.84	7.12	3.02	8.81	6.46	-7.09	5.19e-05	8.12e-08	Poorly soluble	-10.26	3.51e-08	5.5e-11	Insoluble	-7.41	2.47e-05	3.86e-08	Poorly soluble	Low	No	No	No	No	No	No	Yes	-4.63	1	4	1	1	3	0.55	0	0	3	7.15
(2,4-cis and trans)-squamoxinone	CCCCCCCCCCCC[C@@H]([C@H]1CC[C@@H](O1)[C@@H](CCCCC[C@@H](CCCCCC[C@@H]1C[C@H](C(=O)O1)CC(=O)C)O)O)O	C37H68O7	624.93	44	0	0.95	28	7	3	181.8	113.29	7.01	9.16	8.13	3.81	10.07	7.64	-7.64	1.44e-05	2.3e-08	Poorly soluble	-11.44	2.29e-09	3.67e-12	Insoluble	-8.66	1.36e-06	2.17e-09	Poorly soluble	Low	No	Yes	No	No	No	No	Yes	-3.61	1	4	1	1	3	0.55	0	0	3	6.97
(4R,6R)-dihydroxy-4-[10(Z)-heptadecenyl]-2-cyclohexenone	CCCCCCC=CCCCCCCCCC[C@]1(O)C=CC(=O)[C@H](C1)O	C23H40O3	364.56	26	0	0.78	15	3	2	112.17	57.53	4.72	6.95	5.64	3.5	6.39	5.44	-5.49	0.00118	3.25e-06	Moderately soluble	-7.97	3.89e-06	1.07e-08	Poorly soluble	-5.67	0.000779	2.14e-06	Moderately soluble	High	No	No	Yes	Yes	No	Yes	No	-3.59	0	1	1	0	1	0.55	0	1	3	5
candenatenin A	COc1ccc(cc1O)/C=C/Cc1ccc(c(c1OC)OC)O	C18H20O5	316.35	23	12	0.22	6	5	2	89.35	68.15	3.43	3.69	3.27	2.1	3.58	3.21	-4.12	0.0242	7.65e-05	Moderately soluble	-4.81	0.00488	1.54e-05	Moderately soluble	-4.62	0.00752	2.38e-05	Moderately soluble	High	Yes	No	Yes	Yes	Yes	Yes	Yes	-5.61	0	0	0	0	0	0.55	0	0	1	3.01
1,2,4-trihydroxyheptadec-16-ene	C=CCCCCCCCCCCC[C@H](C[C@@H](CO)O)O	C17H34O3	286.45	20	0	0.88	15	3	3	86.84	60.69	3.85	4.82	3.57	2.74	4.62	3.92	-3.66	0.0623	0.000217	Soluble	-5.83	0.000426	1.49e-06	Moderately soluble	-3.96	0.0317	0.000111	Soluble	High	Yes	Yes	No	No	No	Yes	No	-4.63	0	0	1	0	0	0.55	0	1	2	3.86
1,2,4-trihydroxyheptadec-16-yne	C#CCCCCCCCCCCC[C@H](C[C@@H](CO)O)O	C17H32O3	284.43	20	0	0.88	14	3	3	85.48	60.69	3.6	4.29	3.09	2.74	4.46	3.64	-3.38	0.118	0.000415	Soluble	-5.28	0.0015	5.28e-06	Moderately soluble	-3.59	0.0726	0.000255	Soluble	High	Yes	Yes	No	No	No	Yes	No	-4.99	0	0	1	0	0	0.55	0	1	2	4.71
1,2,4-trihydroxynonadecane	CCCCCCCCCCCCCCC[C@H](C[C@@H](CO)O)O	C19H40O3	316.52	22	0	1	17	3	3	96.93	60.69	4.41	6.41	4.57	3.36	5.51	4.85	-4.72	0.00605	1.91e-05	Moderately soluble	-7.48	1.05e-05	3.33e-08	Poorly soluble	-5.1	0.00253	8e-06	Moderately soluble	High	Yes	Yes	No	No	No	Yes	No	-3.68	0	0	1	0	2	0.55	0	0	2	4.13
1,3,5-trihydroxy-4-methoxyxanthone	COc1c(O)cc(c2c1oc1c(O)cccc1c2=O)O	C14H10O6	274.23	20	14	0.07	1	6	3	72.55	100.13	2.15	2.42	2.07	0.02	2	1.73	-3.52	0.0834	0.000304	Soluble	-4.17	0.0187	6.84e-05	Moderately soluble	-3.69	0.0561	0.000205	Soluble	High	No	No	Yes	No	No	Yes	Yes	-6.25	0	0	0	0	0	0.55	0	1	0	3.03
1,3-diacetylvilasinin	CC(=O)O[C@H]1C[C@@H](OC(=O)C)[C@@]2([C@H]3[C@@]1(C)[C@H]1CC[C@@]4(C(=CC[C@H]4c4ccoc4)[C@]1(C)[C@@H]([C@H]3OC2)O)C)C	C30H40O7	512.63	37	5	0.73	5	7	1	136.58	95.2	3.29	4.25	4.79	3.03	4.05	3.88	-5.47	0.00175	3.42e-06	Moderately soluble	-5.96	0.000561	1.09e-06	Moderately soluble	-5.36	0.00222	4.33e-06	Moderately soluble	High	No	Yes	No	No	No	No	No	-6.41	1	3	0	0	0	0.55	0	2	2	6.51
1,6-Dihydroxy-7-methoxy-8-(3-methylbut-2-enyl)6',6'-dimethyl-pyrano(2',3':3,2)xanthone	COc1c(O)cc2c(c1CCC=C(C)C)c(=O)c1c(o2)cc2c(c1O)C=CC(O2)(C)C	C25H26O6	422.47	31	14	0.32	4	6	2	123.18	89.13	4.51	5.92	5.34	2.4	5.58	4.75	-6.26	0.000233	5.51e-07	Poorly soluble	-7.57	1.15e-05	2.72e-08	Poorly soluble	-6.71	8.31e-05	1.97e-07	Poorly soluble	High	No	No	No	Yes	Yes	No	No	-4.67	0	0	0	0	1	0.55	0	2	2	4.31
1-[3-(4-hydroxyphenyl)-2-propenoate]-beta-D-glucopyranoside	OC[C@@H]1O[C@H](OCC(=O)/C=C/c2ccc(cc2)O)[C@H]([C@@H]([C@H]1O)O)O	C16H20O8	340.33	24	6	0.44	6	8	5	81.92	136.68	1.24	-0.71	-1.32	-1.68	-0.34	-0.56	-1.29	17.4	0.0511	Very soluble	-1.68	7.03	0.0207	Very soluble	-0.05	301	0.883	Soluble	Low	No	No	No	No	No	No	No	-8.88	0	1	0	1	0	0.55	0	1	0	4.65
10-Epi-olguine	CC(=O)O[C@H]([C@H](OC(=O)C)/C=C/[C@@H]1O[C@@H]1[C@@H]1OC(=O)C=C[C@@H]1OC(=O)C)C	C18H22O9	382.36	27	0	0.56	10	9	0	89.69	117.73	2.63	0.49	0.61	0.52	1.63	1.17	-1.86	5.29	0.0138	Very soluble	-2.53	1.12	0.00294	Soluble	-0.54	111	0.289	Soluble	High	No	No	No	No	No	Yes	No	-8.28	0	0	0	0	0	0.55	0	3	2	5.17
10-Hydroxyasimicin	CCCCCCCCCC[C@H]([C@H]1CC[C@@H](O1)[C@H]1CC[C@@H](O1)[C@@H](CCCC[C@@H](CCCCC[C@H](CC1=C[C@@H](OC1=O)C)O)O)O)O	C37H66O8	638.92	45	0	0.92	25	8	4	181.26	125.68	6.58	7.81	6.83	3.02	8.47	6.54	-7.07	5.42e-05	8.48e-08	Poorly soluble	-10.29	3.24e-08	5.07e-11	Insoluble	-6.92	7.68e-05	1.2e-07	Poorly soluble	Low	No	No	No	No	No	No	Yes	-4.65	1	4	1	1	3	0.55	0	0	3	7.76
10-Hydroxyglaucanetin	CCCCCCCCCCCC[C@@H]([C@@H]1CC[C@H](O1)[C@@H]1CC[C@H](O1)[C@H](CC[C@H](CCCCC[C@@H](CC1=C[C@H](OC1=O)C)O)O)O)O	C37H66O8	638.92	45	0	0.92	25	8	4	181.26	125.68	6.93	8.17	6.83	3.02	8.47	6.69	-7.3	3.21e-05	5.03e-08	Poorly soluble	-10.67	1.37e-08	2.15e-11	Insoluble	-6.92	7.68e-05	1.2e-07	Poorly soluble	Low	No	No	No	No	No	No	Yes	-4.4	1	4	1	1	3	0.55	0	0	3	7.76
10-Hydroxytrilobacin	CCCCCCCCCC[C@H]([C@H]1CC[C@H](O1)[C@H]1CC[C@@H](O1)[C@@H](CCCC[C@@H](CCCCC[C@H](CC1=C[C@@H](OC1=O)C)O)O)O)O	C37H66O8	638.92	45	0	0.92	25	8	4	181.26	125.68	7.21	7.81	6.83	3.02	8.47	6.67	-7.07	5.42e-05	8.48e-08	Poorly soluble	-10.29	3.24e-08	5.07e-11	Insoluble	-6.92	7.68e-05	1.2e-07	Poorly soluble	Low	No	No	No	No	No	No	Yes	-4.65	1	4	1	1	3	0.55	0	0	3	7.76
11-Hydroxy-1-isomangostin	COc1c(O)cc2c(c1CC=C(C)C)c(=O)c1c(o2)cc(c2c1OC(C)(C)[C@H](C2)O)O	C24H26O7	426.46	31	14	0.38	3	7	3	119.21	109.36	3.27	4.16	3.95	1.46	4.69	3.51	-5.24	0.00245	5.74e-06	Moderately soluble	-6.16	0.000292	6.85e-07	Poorly soluble	-5.96	0.000467	1.09e-06	Moderately soluble	High	No	No	No	No	Yes	No	No	-5.95	0	0	0	0	0	0.55	0	2	2	4.59
12,15-cis-squamostatin-A	CCCCCC[C@H](CCC[C@@H]([C@H]1CC[C@@H](O1)[C@@H](CC[C@H]([C@H]1CC[C@H](O1)CCCCCCCCCC1=C[C@H](OC1=O)C)O)O)O)O	C37H66O8	638.92	45	0	0.92	25	8	4	181.26	125.68	6.99	7.99	6.83	3.02	8.47	6.66	-7.18	4.17e-05	6.53e-08	Poorly soluble	-10.48	2.11e-08	3.3e-11	Insoluble	-6.92	7.68e-05	1.2e-07	Poorly soluble	Low	No	No	No	No	No	No	Yes	-4.52	1	4	1	1	3	0.55	0	0	3	7.62
12-Deoxyphorbol 13-(9,10-methylene)undecanoate	OCC1=C[C@H]2[C@H]3[C@@](C3(C)C)(OC(=O)CCCCCCC[C@H]3C[C@@H]3C)C[C@H]([C@@]2([C@@H]2[C@@](C1)(O)C(=O)C(=C2)C)O)C	C32H48O6	528.72	38	0	0.81	11	6	3	149.24	104.06	5.08	5.07	4.9	3.52	5.72	4.86	-5.59	0.00137	2.59e-06	Moderately soluble	-7	5.32e-05	1.01e-07	Poorly soluble	-5.76	0.000927	1.75e-06	Moderately soluble	High	No	Yes	No	No	No	No	Yes	-5.93	1	3	1	0	1	0.55	0	1	3	6.8
12-Deoxyphorbol 20-acetate 13-angelate	CC=C(C(=O)O[C@@]12C[C@@H](C)[C@]3([C@H]([C@@H]1C2(C)C)C=C(COC(=O)C)C[C@]1([C@H]3C=C(C1=O)C)O)O)C	C27H36O7	472.57	34	0	0.67	6	7	2	126.97	110.13	4.13	2.48	3.05	2.4	3.67	3.14	-3.94	0.0547	0.000116	Soluble	-4.44	0.0173	3.65e-05	Moderately soluble	-3.75	0.0848	0.000179	Soluble	High	No	Yes	No	No	No	No	Yes	-7.42	0	0	0	0	0	0.55	0	3	1	6.07
12-Deoxyphorbol 20-acetate 13-phenylacetate	O=C(O[C@@]12C[C@@H](C)[C@]3([C@H]([C@@H]1C2(C)C)C=C(COC(=O)C)C[C@]1([C@H]3C=C(C1=O)C)O)O)Cc1ccccc1	C30H36O7	508.6	37	6	0.57	7	7	2	137.51	110.13	3.95	2.87	3.32	2.83	4.27	3.45	-4.46	0.0177	3.47e-05	Moderately soluble	-4.84	0.00732	1.44e-05	Moderately soluble	-5.76	0.000876	1.72e-06	Moderately soluble	High	No	Yes	No	No	No	No	Yes	-7.36	1	3	0	0	0	0.55	0	2	1	6.01
15-alpha-acetyl dehydrosulphurenic acid	CC(=O)O[C@H]1C[C@@H]([C@@]2([C@]1(C)C1=CC[C@H]3[C@H](C1=CC2)CC[C@@H](C3(C)C)O)C)[C@H](C(=O)O)CCC(=C)C(C)C	C32H48O5	512.72	37	0	0.75	8	5	2	149.5	83.83	4.28	6.39	6.72	5.06	5.88	5.67	-6.52	0.000156	3.04e-07	Poorly soluble	-7.94	5.85e-06	1.14e-08	Poorly soluble	-5.27	0.00276	5.38e-06	Moderately soluble	Low	No	Yes	No	No	Yes	No	Yes	-4.89	2	4	0	1	1	0.56	0	1	3	6.55
17-alpha-H-digitoxigenin	O[C@H]1CC[C@]2([C@@H](C1)CC[C@@H]1[C@@H]2CC[C@]2([C@]1(O)CC[C@@H]2C1=CC(=O)OC1)C)C	C23H34O4	374.51	27	0	0.87	1	4	2	104.76	66.76	3.09	2.64	3.6	3.56	3.45	3.27	-3.76	0.0652	0.000174	Soluble	-3.69	0.076	0.000203	Soluble	-3.46	0.128	0.000343	Soluble	High	Yes	Yes	No	No	No	No	No	-6.71	0	0	0	0	0	0.55	0	0	1	5.4
17-alpha-H-periplogenin	O[C@H]1CC[C@]2([C@](C1)(O)CC[C@@H]1[C@@H]2CC[C@]2([C@]1(O)CC[C@@H]2C1=CC(=O)OC1)C)C	C23H34O5	390.51	28	0	0.87	1	5	3	105.96	86.99	2.75	1.14	2.72	2.73	2.94	2.46	-2.91	0.477	0.00122	Soluble	-2.56	1.07	0.00275	Soluble	-3.1	0.312	0.0008	Soluble	High	No	Yes	No	No	No	No	No	-7.87	0	0	0	0	0	0.55	0	0	1	5.48
17-alpha-H-periplogenin-3-O-beta-d-cymaroside	CO[C@H]1C[C@H](OC[C@H]2CC[C@]3([C@](C2)(O)CC[C@@H]2[C@@H]3CC[C@]3([C@]2(O)C[CH][C@H]3C2=CC(=O)OC2)C)C)O[C@@H]([C@H]1O)C	C31H47O8	547.7	39	0	0.9	5	8	3	144.5	114.68	0	1.42	3.32	2.34	3.26	2.07	-3.8	0.0867	0.000158	Soluble	-3.43	0.202	0.000369	Soluble	-3.8	0.0874	0.00016	Soluble	High	No	Yes	No	No	No	No	No	-8.63	1	3	0	0	0	0.55	0	0	1	7
17-alpha-H-periplogenin-3-O-beta-d-digitoxoside	O=C1OCC(=C1)[C@H]1[CH]C[C@]2([C@]1(C)CC[C@H]1[C@H]2CC[C@]2([C@]1(C)CC[C@@H](C2)CO[C@H]1C[C@H](O)[C@@H]([C@H](O1)C)O)O)O	C30H45O8	533.67	38	0	0.9	4	8	4	139.77	125.68	0	1.01	2.66	2.15	2.71	1.71	-3.52	0.161	0.000301	Soluble	-3.24	0.308	0.000577	Soluble	-3.11	0.412	0.000773	Soluble	High	No	Yes	No	No	No	No	No	-8.84	1	3	0	0	0	0.55	0	0	1	6.9
17-alpha-H-periplogenin-beta-glucopyranosyl-(1->4)-2-O-acetyl-beta-digitalopyranoside	CO[C@@H]1[C@@H](OC(=O)C)[C@H](OC[C@H]2CC[C@]3([C@](C2)(O)CC[C@@H]2[C@@H]3CC[C@]3([C@]2(O)C[CH][C@H]3C2=CC(=O)OC2)C)C)O[C@@H]([C@@H]1O[C@@H]1O[C@H](CO)[C@H]([C@@H]([C@H]1O)O)O)C	C39H59O15	767.88	54	0	0.9	10	15	6	187.78	220.13	0	-0.24	0.68	-0.39	0.81	0.17	-3.79	0.125	0.000162	Soluble	-3.92	0.0913	0.000119	Soluble	-1.73	14.4	0.0188	Soluble	Low	No	Yes	No	No	No	No	No	-11.15	3	3	1	1	4	0.17	0	1	2	8.43
17-beta-H-periplogenin-3-O-beta-d-digitoxoside	O=C1OCC(=C1)[C@@H]1[CH]C[C@]2([C@]1(C)CC[C@H]1[C@H]2CC[C@]2([C@]1(C)CC[C@@H](C2)CO[C@H]1C[C@H](O)[C@@H]([C@H](O1)C)O)O)O	C30H45O8	533.67	38	0	0.9	4	8	4	139.77	125.68	0	1.01	2.66	2.15	2.71	1.71	-3.52	0.161	0.000301	Soluble	-3.24	0.308	0.000577	Soluble	-3.11	0.412	0.000773	Soluble	High	No	Yes	No	No	No	No	No	-8.84	1	3	0	0	0	0.55	0	0	1	6.9
1-beta,6-alpha-dihydroxy-4(15)-eudesmene	C=C1CC[C@H]([C@]2([C@H]1[C@@H](O)[C@@H](CC2)C(C)C)C)O	C15H26O2	238.37	17	0	0.87	1	2	2	71.58	40.46	2.77	2.63	2.75	2.74	2.6	2.7	-2.91	0.294	0.00123	Soluble	-3.13	0.177	0.000741	Soluble	-2.18	1.59	0.00667	Soluble	High	Yes	No	No	No	No	No	No	-5.89	0	0	0	0	0	0.55	0	1	1	4.01
1-O-formyl-4'-demethoxy-3',4'-methylenedioxy-methyl rocaglate	O=CO[C@H]1[C@H](C(=O)OC)[C@H]([C@]2([C@]1(O)c1c(OC)cc(cc1O2)OC)c1ccc2c(c1)OCO2)c1ccccc1	C29H26O10	534.51	39	18	0.31	8	10	1	134.42	118.98	4.06	3.1	2.82	1.82	3.79	3.12	-4.92	0.00642	1.2e-05	Moderately soluble	-5.27	0.00289	5.41e-06	Moderately soluble	-6.82	8.11e-05	1.52e-07	Poorly soluble	High	No	Yes	No	No	Yes	Yes	Yes	-7.36	1	2	0	0	0	0.55	0	2	2	5.43
2(R)-hydroxybutanedioic acid	OC(=O)C[C@H](C(=O)O)O	C4H6O5	134.09	9	0	0.5	3	5	3	26.05	94.83	-0.07	-1.26	-1.09	-1.37	-1.25	-1.01	0.32	280	2.09	Highly soluble	-0.24	78	0.582	Very soluble	1.53	4510	33.7	Soluble	High	No	No	No	No	No	No	No	-8.01	0	4	0	0	2	0.56	0	0	1	2.27
2(R)-hydroxybutanedioic acid 1-methyl ester	COC(=O)[C@@H](CC(=O)O)O	C5H8O5	148.11	10	0	0.6	4	5	2	30.37	83.83	0.75	-1	-1.01	-0.96	-0.8	-0.6	0.14	202	1.37	Highly soluble	-0.27	78.8	0.532	Very soluble	0.81	959	6.47	Soluble	High	No	No	No	No	No	No	No	-7.91	0	4	0	0	1	0.56	0	0	1	2.41
2,3-dihydrowithaferin A	OCC1=C(C)C[C@@H](OC1=O)[C@H]([C@H]1CC[C@@H]2[C@]1(C)CC[C@H]1[C@H]2C[C@H]2[C@@]3([C@@]1(C)C(=O)CC[C@@H]3O)O2)C	C28H40O6	472.61	34	0	0.86	3	6	2	127.96	96.36	3.39	3.82	3.58	2.84	4.34	3.59	-4.98	0.00496	1.05e-05	Moderately soluble	-5.54	0.00137	2.89e-06	Moderately soluble	-4.26	0.0259	5.48e-05	Moderately soluble	High	No	Yes	No	No	No	No	No	-6.47	0	1	0	0	0	0.55	0	1	2	6.75
2-[10(Z)-heptadecenyl]-1,4-hydroquinone	CCCCCCC=CCCCCCCCCCc1cc(O)ccc1O	C23H38O2	346.55	25	6	0.65	15	2	2	111.89	40.46	5.01	9.2	7.29	5.22	7.41	6.83	-6.97	3.69e-05	1.07e-07	Poorly soluble	-9.95	3.91e-08	1.13e-10	Poorly soluble	-7.35	1.53e-05	4.43e-08	Poorly soluble	Low	No	No	Yes	Yes	No	Yes	No	-1.88	1	1	1	1	1	0.55	0	2	2	3.23
20-hydroxy-12-deoxyphorbol angelate	C/C=C(/C(=O)O[C@@]12C[C@@H](C)[C@]3([C@H]([C@@H]1C2(C)C)C=C(CO)C[C@]1([C@H]3C=C(C1=O)C)O)O)\C	C25H34O6	430.53	31	0	0.68	4	6	3	117.24	104.06	3.5	1.9	2.48	2.06	3.13	2.61	-3.44	0.155	0.000361	Soluble	-3.71	0.0843	0.000196	Soluble	-3.14	0.313	0.000728	Soluble	High	No	Yes	No	No	No	No	Yes	-7.58	0	0	0	0	0	0.55	0	2	1	5.85
20-hydroxyresiniferol 9,13,-14-orthophenylacetate	OCC1=C[C@H]2[C@H]3O[C@@]4(O[C@]2([C@H]2[C@@](C1)(O)C(=O)C(=C2)C)[C@@H](C[C@@]3(O4)C(=C)C)C)Cc1ccccc1	C28H32O6	464.55	34	6	0.54	4	6	2	126.29	85.22	0	2.72	3.24	2.51	4.04	2.5	-4.3	0.0233	5.01e-05	Moderately soluble	-4.16	0.0319	6.86e-05	Moderately soluble	-5.32	0.00222	4.79e-06	Moderately soluble	High	No	Yes	No	No	No	No	No	-7.2	0	0	0	0	0	0.55	0	1	1	6.89
21-O-methyltoosendanpentol	CO[C@H]1O[C@H](C[C@@H]1[C@@H]1CC=C2[C@]1(C)CC[C@H]1[C@]2(C)[C@@H](O)C[C@@H]2[C@]1(C)CC[C@@H](C2(C)C)O)[C@@H](C(O)(C)C)O	C31H52O6	520.74	37	0	0.94	4	6	4	145.9	99.38	3.4	4.36	4.43	3.22	3.77	3.84	-5.55	0.00146	2.81e-06	Moderately soluble	-6.16	0.000358	6.88e-07	Poorly soluble	-3.74	0.095	0.000182	Soluble	High	No	Yes	No	No	No	No	No	-6.38	1	3	0	0	0	0.55	0	1	2	7.38
22-epicalamistrin	CCCCCCCCCCCC[C@H]([C@H]1CC[C@@H](O1)C[C@H](OC(=O)C)C[C@H](CCCCCCCCC[CH]CCC1=C[C@H](OC1=O)C)O)O	C40H71O7	663.99	47	0	0.9	31	7	2	194.61	102.29	0	12.51	9.65	5.05	11.51	7.74	-9.79	1.07e-07	1.61e-10	Poorly soluble	-14.68	1.38e-12	2.08e-15	Insoluble	-10.1	5.26e-08	7.93e-11	Insoluble	Low	No	Yes	No	No	No	No	No	-1.47	2	4	1	1	3	0.17	0	1	3	7.59
23,24-dihydro-25-acetylcucurbitacin F	CC(=O)OC(CCC(=O)[C@@]([C@H]1[C@H](O)C[C@@]2([C@]1(C)CC(=O)[C@@]1([C@H]2CC=C2[C@H]1C[C@H](O)[C@H](C2(C)C)O)C)C)(O)C)(C)C	C32H50O8	562.73	40	0	0.84	7	8	4	152.38	141.36	3.27	2.57	3.52	1.93	4.09	3.08	-4.49	0.0184	3.27e-05	Moderately soluble	-5.19	0.00366	6.51e-06	Moderately soluble	-4.28	0.0293	5.21e-05	Moderately soluble	Low	No	Yes	No	No	No	No	Yes	-7.91	1	3	1	1	0	0.55	0	1	1	6.79
23,24-Dihydrocucurbitacin B	CC(=O)OC(CCC(=O)[C@@]([C@H]1[C@@H](O)C[C@]2([C@]1(C)CC(=O)[C@@]1([C@@H]2CC=C2[C@H]1C[C@H](O)C(=O)C2(C)C)C)C)(O)C)(C)C	C32H48O8	560.72	40	0	0.81	7	8	3	151.41	138.2	3.86	2.7	3.72	1.85	4.68	3.36	-4.56	0.0156	2.78e-05	Moderately soluble	-5.26	0.00312	5.56e-06	Moderately soluble	-4.98	0.00587	1.05e-05	Moderately soluble	Low	No	Yes	No	No	No	No	Yes	-7.8	1	3	0	1	0	0.55	0	1	1	6.68
23,24-dihydrocucurbitacin F	O[C@H]1C[C@@H]2C(=CC[C@@H]3[C@@]2(C)C(=O)C[C@]2([C@@]3(C)C[C@H]([C@@H]2[C@](C(=O)CCC(O)(C)C)(O)C)O)C)C([C@@H]1O)(C)C	C30H48O7	520.7	37	0	0.87	5	7	5	142.64	135.29	3.31	2	2.94	1.62	3.54	2.68	-4	0.0523	0.0001	Soluble	-4.47	0.0177	3.41e-05	Moderately soluble	-3.68	0.108	0.000207	Soluble	High	No	Yes	No	No	No	No	Yes	-8.06	1	3	0	1	0	0.55	0	1	1	6.78
24,25-dihydro-27-desoxywithaferin A	C[C@H]1[C@H](C)C[C@H](OC1=O)[C@H]([C@H]1CC[C@@H]2[C@]1(C)CC[C@H]1[C@H]2C[C@@H]2[C@]3([C@]1(C)C(=O)C=C[C@@H]3O)O2)C	C28H40O5	456.61	33	0	0.86	2	5	1	126.8	76.13	3.9	5.1	4.32	3.66	4.16	4.23	-5.75	0.000808	1.77e-06	Moderately soluble	-6.44	0.000165	3.61e-07	Poorly soluble	-3.94	0.0529	0.000116	Soluble	High	No	Yes	No	No	No	No	No	-5.46	0	1	0	0	1	0.55	0	1	2	6.8
24-epibrassinolide	O[C@H]([C@H]([C@H]1CC[C@@H]2[C@]1(C)CC[C@H]1[C@H]2COC(=O)[C@@H]2[C@]1(C)C[C@@H](O)[C@H](C2)O)C)[C@@H]([C@H](C(C)C)C)O	C28H48O6	480.68	34	0	0.96	5	6	4	133.67	107.22	3.53	4.84	3.39	3.05	3.51	3.67	-5.54	0.00139	2.89e-06	Moderately soluble	-6.83	7.19e-05	1.5e-07	Poorly soluble	-2.7	0.966	0.00201	Soluble	High	No	Yes	No	No	No	No	No	-5.8	0	3	0	0	0	0.55	0	0	2	6.14
25-acetylcucurbitacin F	CC(=O)OC(/C=C/C(=O)[C@@]([C@H]1[C@H](O)C[C@@]2([C@]1(C)CC(=O)[C@@]1([C@H]2CC=C2[C@H]1C[C@H](O)[C@H](C2(C)C)O)C)C)(O)C)(C)C	C32H48O8	560.72	40	0	0.78	6	8	4	151.9	141.36	4.29	2.51	3.29	1.85	3.91	3.17	-4.5	0.0177	3.15e-05	Moderately soluble	-5.12	0.00421	7.51e-06	Moderately soluble	-3.57	0.152	0.000272	Soluble	Low	No	No	No	No	No	No	Yes	-7.94	1	3	1	1	0	0.55	0	2	1	6.83
27-hydroxybullatacin	CCCCCCC[C@@H](CC[C@@H]([C@H]1CC[C@@H](O1)[C@H]1CC[C@@H](O1)[C@@H](CCCCCCCCCC[C@H](CC1=C[C@@H](OC1=O)C)O)O)O)O	C37H66O8	638.92	45	0	0.92	25	8	4	181.26	125.68	6.04	8.17	6.83	3.02	8.47	6.51	-7.3	3.21e-05	5.03e-08	Poorly soluble	-10.67	1.37e-08	2.15e-11	Insoluble	-6.92	7.68e-05	1.2e-07	Poorly soluble	Low	No	No	No	No	No	No	Yes	-4.4	1	4	1	1	3	0.55	0	0	3	7.76
27-O-h-D-glucopyranosylviscosalactone B	O=C[C@H](CCC(=O)O)NOCC1=C(C)C[C@H](OC1=O)[C@H]([C@H]1CC[C@@H]2[C@]1(C)CC[C@H]1[C@@H]2C[C@@H]2[C@]3([C@]1(C)C(=O)C[C@@H]([C@@H]3O)O)O2)C	C33H47NO10	617.73	44	0	0.82	10	11	4	157.86	171.99	2.98	-0.26	2.51	1.35	3.37	1.99	-2.85	0.88	0.00143	Soluble	-2.89	0.79	0.00128	Soluble	-3.83	0.0922	0.000149	Soluble	Low	No	No	No	No	No	No	Yes	-10.25	2	3	1	1	3	0.11	0	3	2	7.78
28-deoxonimbolide	COC(=O)C[C@H]1[C@@]2(C)[C@H](O[C@H]3C2=C(C)[C@H](C3)c2cocc2)[C@H]2[C@@H]3[C@]1(C)C(=O)C=C[C@@]3(C)CO2	C27H32O6	452.54	33	5	0.63	4	6	0	120.78	74.97	3.6	2.43	4.22	2.35	4.13	3.34	-4.02	0.0427	9.45e-05	Moderately soluble	-3.65	0.102	0.000225	Soluble	-5.4	0.00181	4.01e-06	Moderately soluble	High	Yes	No	No	No	No	Yes	No	-7.34	0	0	0	0	0	0.55	0	1	1	6.05
28-homocastasterone	COc1c(O)cc2c(c1CCC(O)(C)C)c(=O)c1c(o2)cc(c(c1O)CC=C(C)C)O	C24H28O7	428.47	31	14	0.38	6	7	4	121.66	120.36	3.99	4.9	4.28	1.46	4.94	3.91	-5.52	0.00129	3.01e-06	Moderately soluble	-7.16	2.94e-05	6.86e-08	Poorly soluble	-5.91	0.000524	1.22e-06	Moderately soluble	High	No	No	No	No	No	No	No	-5.43	0	0	0	0	0	0.55	0	2	2	4.02
2-alpha,3-beta,13-beta-trihydroxyurs-11-en-28-oic acid	C[C@H]1CC[C@]2([C@H]([C@H]1C)[C@@]1(O)C=C[C@H]3[C@@]([C@@H]1CC2)(C)CC[C@@H]1[C@]3(C)C[C@@H](O)[C@@H](C1(C)C)O)C(=O)O	C29H46O5	474.67	34	0	0.9	1	5	4	134.73	97.99	3.45	5	4.64	3.95	3.16	4.04	-5.87	0.000645	1.36e-06	Moderately soluble	-6.8	7.57e-05	1.59e-07	Poorly soluble	-3.44	0.174	0.000366	Soluble	High	No	Yes	No	No	No	No	No	-5.65	0	2	0	0	0	0.56	0	1	2	6.42
2-alpha,3-beta-Dihydroxy-D:A-friedoolean-28-oic acid	O[C@@H]1C[C@@H]2[C@]([C@H]([C@H]1O)C)(C)CC[C@H]1[C@@]2(C)CC[C@@]2([C@]1(C)CC[C@@]1([C@H]2CC(C)(C)CC1)C(=O)O)C	C30H50O4	474.72	34	0	0.97	1	4	3	138.29	77.76	3.69	7.44	6.28	5.08	4.97	5.49	-7.4	1.87e-05	3.94e-08	Poorly soluble	-8.9	5.91e-07	1.25e-09	Poorly soluble	-5.32	0.00229	4.83e-06	Moderately soluble	High	No	Yes	No	No	No	No	No	-3.91	1	3	0	1	1	0.56	0	0	2	5.48
2-alpha-hydroxy-3-beta-{[(2E)-3-phenyl-1-oxo-2-propenyl]oxy}-olean-12-en-28-oic acid	O=C(O[C@H]1[C@H](O)C[C@]2([C@H](C1(C)C)CC[C@@]1([C@H]2CC=C2[C@@]1(C)CC[C@@]1([C@@H]2CC(C)(C)CC1)C(=O)O)C)C)/C=C/c1ccccc1	C39H54O5	602.84	44	6	0.69	5	5	2	177.16	83.83	4.58	9.17	8.36	6.15	7.19	7.09	-9.13	4.51e-07	7.49e-10	Poorly soluble	-10.83	8.97e-09	1.49e-11	Insoluble	-8.01	5.85e-06	9.71e-09	Poorly soluble	Low	No	No	No	No	No	No	No	-3.47	2	4	0	1	2	0.56	0	2	2	6.9
2-alpha-hydroxy-3-beta-{[(2E)-3-phenyl-1-oxo-2-propenyl]oxy}urs-12-en-28-oic acid	O=C(O[C@@H]1[C@@H](O)C[C@@]2([C@@H](C1(C)C)CC[C@@]1([C@H]2CC=C2[C@@H]1CC[C@]1([C@H]2CC(C)(C)CC1)C(=O)O)C)C)/C=C/c1ccccc1	C38H52O5	588.82	43	6	0.68	5	5	2	172.62	83.83	4.69	8.62	7.97	5.98	6.66	6.78	-8.69	1.19e-06	2.02e-09	Poorly soluble	-10.26	3.26e-08	5.54e-11	Insoluble	-7.42	2.21e-05	3.76e-08	Poorly soluble	Low	No	No	No	No	No	No	No	-3.77	2	4	0	1	1	0.56	0	2	2	6.77
2-alpha-hydroxyursolic acid	C[C@@H]1CC[C@]2([C@H]([C@H]1C)C1=CC[C@@H]3[C@@]([C@@]1(CC2)C)(C)CC[C@@H]1[C@]3(C)C[C@@H](O)[C@@H](C1(C)C)O)C(=O)O	C30H48O4	472.7	34	0	0.9	1	4	3	138.08	77.76	3.47	6.37	6.06	4.97	4.56	5.09	-6.72	9.05e-05	1.91e-07	Poorly soluble	-7.79	7.59e-06	1.61e-08	Poorly soluble	-4.85	0.00668	1.41e-05	Moderately soluble	High	No	Yes	No	No	No	No	No	-4.66	1	3	0	1	1	0.56	0	1	2	6.34
2-deoxycucurbitacin D	O[C@@H]1C[C@@]2([C@]([C@H]1[C@](C(=O)/C=C/C(O)(C)C)(O)C)(C)CC(=O)[C@@]1([C@H]2CC=C2[C@H]1CCC(=O)C2(C)C)C)C	C30H44O6	500.67	36	0	0.77	4	6	3	140.04	111.9	3.41	2.62	3.96	2.24	4.83	3.41	-4.33	0.0234	4.67e-05	Moderately soluble	-4.62	0.012	2.4e-05	Moderately soluble	-4.49	0.0164	3.27e-05	Moderately soluble	High	No	Yes	No	No	No	No	Yes	-7.49	1	3	0	0	0	0.55	0	2	1	6.52
2-methyl-3-hydroxy-4-pyrone	O=c1ccoc(c1O)C	C6H6O3	126.11	9	6	0.17	0	3	1	31.97	50.44	1.47	0.09	0.65	-0.84	1.36	0.55	-1.17	8.49	0.0673	Very soluble	-0.7	24.9	0.198	Very soluble	-1.71	2.48	0.0197	Soluble	High	Yes	No	No	No	No	No	No	-7.01	0	3	0	0	1	0.55	0	0	1	2.39
convallatoxin	O=CC12CCC(CC2(O)CCC2C1CCC1(C2(O)CCC1C1=CC(=O)OC1)C)OC1OC(C)C(C(C1O)O)O	C29H42O10	550.64	39	0	0.86	4	10	5	137.38	162.98	2.94	-0.48	0.75	0.31	1.11	0.93	-2.69	1.13	0.00205	Soluble	-2.48	1.84	0.00334	Soluble	-1.44	19.8	0.036	Soluble	Low	No	Yes	No	No	No	No	No	-10	1	3	1	1	1	0.55	0	2	1	6.85
3,3',4',5,6,7,8-heptamethoxyflavone	COc1cc(ccc1OC)c1oc2c(OC)c(OC)c(c(c2c(=O)c1OC)OC)OC	C22H24O9	432.42	31	16	0.32	8	9	0	113.36	94.82	4.09	3.19	3.52	0.04	4.37	3.04	-4.38	0.0178	4.12e-05	Moderately soluble	-4.85	0.00607	1.4e-05	Moderately soluble	-6.92	5.26e-05	1.22e-07	Poorly soluble	High	No	No	No	No	Yes	No	No	-6.67	0	0	0	0	0	0.55	0	0	2	4.11
3,5,7,3',4',5'-hexahydroxy flavanone-3-O-beta-D-glucopyranoside	O=C[C@@H](NO[C@@H]1[C@H](Oc2c(C1=O)c(O)cc(c2)O)c1cc(O)c(c(c1)O)O)CCC(=O)O	C20H19NO11	449.36	32	12	0.25	8	12	7	105.51	203.08	0.09	-1.96	0.53	-1.56	0	-0.58	-1.14	32.5	0.0723	Very soluble	-1.78	7.42	0.0165	Very soluble	-1.89	5.83	0.013	Soluble	Low	No	No	No	No	No	No	No	-10.43	2	0	1	1	3	0.11	1	3	2	4.66
3,5,7,3',4'-pentahydroxyflavone-3-O-beta-D-glucopyranoside	O=C[C@@H](NO[C@@H]1[C@H](Oc2c(C1=O)c(O)cc(c2)O)c1ccc(c(c1)O)O)CCC(=O)O	C20H19NO10	433.37	31	12	0.25	8	11	6	103.49	182.85	1.08	-1.61	0.82	-1.07	0.46	-0.06	-1.27	23.2	0.0536	Very soluble	-1.72	8.25	0.019	Very soluble	-2.48	1.44	0.00333	Soluble	Low	No	No	No	No	No	No	No	-10.09	2	0	1	1	3	0.11	1	3	2	4.62
3,5,7,3',4'-pentahydroxyflavonol-3-O-beta-D-galactopyranoside			0	0	0	0.25	0	11	6	0	0	1.08	-1.61	0.82	-1.07	0.46	-0.06	-1.27	23.2	0.0536	Very soluble	-1.72	8.25	0.019	Very soluble	-2.48	1.44	0.00333	Soluble	Low	No	No	No	No	No	No	No	-10.09	2	0	1	1	3	0.11	1	3	2	4.62
3,5,7,3',4'-pentahydroxyflavonol-3-O-beta-D-glucopyranoside	COc1cc2c(c(c1O)Oc1ccc(cc1)C[C@@H]1N(C)CCc3c1cc(OC)c(c3O)OC)C[C@H]1c3c2c(OC)c(c(c3CCN1C)O)OC	C39H44N2O9	684.77	50	24	0.38	9	11	3	197.55	122.55	5.58	5.67	4.75	2.13	5.79	4.78	-7.42	2.61e-05	3.81e-08	Poorly soluble	-8.01	6.71e-06	9.81e-09	Poorly soluble	-9.51	2.14e-07	3.13e-10	Poorly soluble	Low	No	No	No	No	No	No	No	-6.45	2	3	0	0	3	0.17	0	0	3	5.97
3,5'-dihydroxythalifaboramine			0	0	0	0.38	0	11	3	0	0	5.58	5.67	4.75	2.13	5.79	4.78	-7.42	2.61e-05	3.81e-08	Poorly soluble	-8.01	6.71e-06	9.81e-09	Poorly soluble	-9.51	2.14e-07	3.13e-10	Poorly soluble	Low	No	No	No	No	No	No	No	-6.45	2	3	0	0	3	0.17	0	0	3	5.97
3’-O-Methyl-6-(1,1-dimethylallyl)eriodictyol	COc1cc(ccc1O)[C@@H]1CC(=O)c2c(O1)cc(c(c2O)C(C=C)(C)C)O	C21H22O6	370.4	27	12	0.29	4	6	3	101.67	96.22	3.1	4.55	3.66	1.5	3.81	3.32	-5.07	0.00317	8.55e-06	Moderately soluble	-6.29	0.000188	5.09e-07	Poorly soluble	-4.76	0.00642	1.73e-05	Moderately soluble	High	No	No	Yes	No	Yes	No	Yes	-5.33	0	0	0	0	0	0.55	0	1	2	3.84
3-beta,13-beta-dihydroxyurs-11-en-28-oic acid	C[C@H]1CC[C@]2([C@H]([C@H]1C)[C@@]1(O)C=C[C@H]3[C@@]([C@@H]1CC2)(C)CC[C@@H]1[C@]3(C)CC[C@@H](C1(C)C)O)C(=O)O	C29H46O4	458.67	33	0	0.9	1	4	3	133.57	77.76	3.78	5.98	5.67	4.78	4.05	4.85	-6.39	0.000189	4.12e-07	Poorly soluble	-7.39	1.87e-05	4.08e-08	Poorly soluble	-4.26	0.0253	5.52e-05	Moderately soluble	High	No	Yes	No	No	No	No	No	-4.85	1	3	0	0	1	0.56	0	1	2	6.29
3-beta,15-alpha-dihydroxy lanosta-7,9(11),24-triene-21-oic acid	CC(=CCC[C@H]([C@H]1C[C@@H]([C@@]2([C@]1(C)CC=C1C2=CC[C@H]2[C@H]1CC[C@@H](C2(C)C)O)C)O)C(=O)O)C	C29H44O4	456.66	33	0	0.76	5	4	3	134.95	77.76	3.87	5.29	5.9	4.59	4.92	4.92	-5.67	0.000967	2.12e-06	Moderately soluble	-6.67	9.68e-05	2.12e-07	Poorly soluble	-4.27	0.0243	5.32e-05	Moderately soluble	High	No	Yes	No	No	Yes	No	Yes	-5.33	1	3	0	1	1	0.56	0	1	2	6.33
3-beta,23,28-trihydroxy-12-oleanene 23-caffeate	OC[C@@]12CCC(C[C@@H]2[C@@H]2[C@](CC1)(C)[C@]1(C)CC[C@@H]3[C@]([C@H]1CC2)(C)CC[C@@H]([C@@]3(C)COC(=O)CCc1ccc(c(c1)O)O)O)(C)C	C39H60O6	624.89	45	6	0.82	7	6	4	180.76	107.22	4.53	9.02	7.79	5.31	7.17	6.76	-9.03	5.78e-07	9.26e-10	Poorly soluble	-11.16	4.29e-09	6.87e-12	Insoluble	-8.28	3.32e-06	5.31e-09	Poorly soluble	Low	No	No	No	No	No	No	Yes	-3.71	2	4	0	1	2	0.17	1	1	2	6.44
3-beta,23,28-trihydroxy-12-oleanene 3-beta-caffeate	OC[C@]1(C)[C@H](CC[C@]2([C@H]1CC[C@@]1([C@@H]2CC[C@H]2[C@@]1(C)CC[C@@]1([C@@H]2CC(CC1)(C)C)CO)C)C)O[C@H](CCc1ccc(c(c1)O)O)O	C39H62O6	626.91	45	6	0.85	7	6	5	181.72	110.38	4.92	8.89	7.58	4.99	6.85	6.65	-8.96	6.81e-07	1.09e-09	Poorly soluble	-11.09	5.05e-09	8.05e-12	Insoluble	-7.8	1e-05	1.6e-08	Poorly soluble	Low	No	No	No	No	No	No	No	-3.81	2	4	0	1	2	0.17	1	2	2	6.87
strophanthidin	O=C[C@@]12CC[C@@H](C[C@@]2(O)CC[C@@H]2[C@@H]1CC[C@]1([C@]2(O)CC[C@@H]1C1=CC(=O)OC1)C)O	C23H32O6	404.5	29	0	0.83	2	6	3	106.16	104.06	2.12	0.64	1.9	1.82	2.64	1.82	-2.62	0.972	0.0024	Soluble	-2.4	1.61	0.00398	Soluble	-2.65	0.914	0.00226	Soluble	High	No	Yes	No	No	No	No	No	-8.31	0	0	0	0	0	0.55	0	1	1	5.42
3-beta-trans-p-coumaroyloxy-2-alpha-hydroxyolean-12-en-28-oic acid	O=C(O[C@@H]1[C@@H](O)C[C@@]2([C@@H](C1(C)C)CC[C@@]1([C@H]2CC=C2[C@@H]1CC[C@]1([C@H]2CC(C)(C)CC1)C(=O)O)C)C)/C=C/c1ccc(cc1)O	C38H52O6	604.82	44	6	0.68	5	6	3	174.64	104.06	4.48	8.27	7.68	5.43	6.19	6.41	-8.57	1.62e-06	2.69e-09	Poorly soluble	-10.32	2.91e-08	4.81e-11	Insoluble	-6.83	8.97e-05	1.48e-07	Poorly soluble	Low	No	Yes	No	No	No	No	Yes	-4.12	2	4	0	1	2	0.56	0	2	2	6.73
3-beta-trans-p-coumaroyloxy-2-alpha-hydroxyurs-12-en-28-oic acid	O=C(O[C@H]1[C@H](O)C[C@]2([C@H](C1(C)C)CC[C@@]1([C@@H]2CC=C2[C@@]1(C)CC[C@@]1([C@H]2[C@@H](C)[C@H](C)CC1)C(=O)O)C)C)/C=C/c1ccc(cc1)O	C39H54O6	618.84	45	6	0.69	5	6	3	179.45	104.06	4.45	8.67	7.92	5.61	6.32	6.59	-8.91	7.66e-07	1.24e-09	Poorly soluble	-10.73	1.14e-08	1.85e-11	Insoluble	-6.97	6.68e-05	1.08e-07	Poorly soluble	Low	No	Yes	No	No	No	No	Yes	-3.92	2	4	0	1	2	0.56	0	2	2	6.97
3'-formyl-2',4',6'-trihydroxy-5'-methyldihydrochalcone	O=Cc1c(O)c(C(=O)CCc2ccccc2)c(c(c1O)C)O	C17H16O5	300.31	22	12	0.18	5	5	3	82.35	94.83	1.76	3.36	2.74	1.25	3.38	2.5	-3.89	0.0385	0.000128	Soluble	-5.03	0.00281	9.35e-06	Moderately soluble	-4.27	0.016	5.33e-05	Moderately soluble	High	No	No	Yes	No	Yes	No	Yes	-5.75	0	0	0	0	0	0.55	0	1	0	2.12
3-hydroxy-6'-desmethyl-9-O-methylthalifaboramine	COc1c(OC)cc2c(c1Oc1ccc(cc1)C[C@@H]1N(C)CCc3c1cc(OC)c(c3)O)C[C@H]1c3c2c(OC)c(c(c3CCN1C)O)OC	C39H44N2O8	668.78	49	24	0.38	9	10	2	195.53	102.32	5.19	6.02	5.05	2.62	6.26	5.03	-7.55	1.9e-05	2.83e-08	Poorly soluble	-7.95	7.56e-06	1.13e-08	Poorly soluble	-10.1	5.28e-08	7.89e-11	Insoluble	High	No	No	No	No	No	No	No	-6.11	1	3	0	0	2	0.55	0	0	3	5.93
3-hydroxythalifaboramine	COc1cc2c(c(c1O)Oc1ccc(cc1)C[C@@H]1N(C)CCc3c1cc(OC)c(c3)OC)C[C@H]1c3c2c(OC)c(c(c3CCN1C)O)OC	C39H44N2O8	668.78	49	24	0.38	9	10	2	195.53	102.32	5.21	6.02	5.05	2.62	6.26	5.03	-7.55	1.9e-05	2.83e-08	Poorly soluble	-7.95	7.56e-06	1.13e-08	Poorly soluble	-10.1	5.28e-08	7.89e-11	Insoluble	High	No	No	No	No	No	No	No	-6.11	1	3	0	0	2	0.55	0	0	3	5.93
3-methoxy-4-hydroxybenzoic acid	COc1cc(ccc1O)C(=O)O	C8H8O4	168.15	12	6	0.12	2	4	2	41.92	66.76	1.4	1.43	1.1	0.74	0.73	1.08	-2.02	1.6	0.00952	Soluble	-2.44	0.615	0.00366	Soluble	-1.32	8.1	0.0482	Soluble	High	No	No	No	No	No	No	No	-6.31	0	0	0	0	1	0.85	0	0	1	1.42
convallatoxol	OC[C@@]12CC[C@@H](C[C@@]2(O)CCC2C1CC[C@]1([C@]2(O)CC[C@@H]1C1=CC(=O)OC1)C)O[C@H]1OC(C)[C@H](C(C1O)O)O	C29H44O10	552.65	39	0	0.9	4	10	6	138.34	166.14	2.87	-0.62	0.54	0.41	0.81	0.8	-2.61	1.35	0.00244	Soluble	-2.4	2.22	0.00401	Soluble	-1.32	26.3	0.0476	Soluble	Low	No	Yes	No	No	No	No	No	-10.11	2	3	1	1	2	0.17	0	1	1	6.96
3-O-[alpha-L-rhamnopyranosyl(1->2)-beta-D-glucopyranosyl(1->2)-beta-D-glucuronopyranosyl]olean-12-en-22-oxo-3-beta,24-diol methyl ester	OC[C@@]1(C)[C@@H](CC[C@]2([C@H]1CC[C@@]1([C@H]2CC=C2[C@@]1(C)OC[C@@]1([C@H]2CC(CC1=O)(C)C)C)C)C)O[C@@]1(C)O[C@H](C(=O)O)[C@H]([C@@H]([C@H]1O[C@@H]1O[C@H](O)[C@H]([C@@H]([C@H]1O)O)O)O)O	C41H64O15	796.94	56	0	0.9	6	15	8	198.23	242.13	2.62	1.07	1.4	-0.46	0.86	1.1	-5.06	0.00696	8.73e-06	Moderately soluble	-5.75	0.00143	1.79e-06	Moderately soluble	-2	7.9	0.00991	Soluble	Low	No	Yes	No	No	No	No	No	-10.4	3	3	1	1	4	0.11	0	2	1	8.88
3-O-[alpha-L-rhamnopyranosyl(1->2)-beta-D-glucopyranosyl(1->2)-beta-D-glucuronopyranosyl]olean-12-en-3-beta,22-beta,24-triol	OC[C@@]1(C)[C@@H](CC[C@]2([C@H]1CC[C@@]1([C@H]2CC=C2[C@@]1(C)OC[C@@]1([C@H]2CC(C[C@H]1O)(C)C)C)C)C)O[C@@]1(C)O[C@H](C(=O)O)[C@H]([C@@H]([C@H]1O[C@@H]1O[C@H](O)[C@H]([C@@H]([C@H]1O)O)O)O)O	C41H66O15	798.95	56	0	0.93	6	15	9	199.2	245.29	3.95	1.39	1.19	-0.36	0.28	1.29	-5.27	0.00426	5.33e-06	Moderately soluble	-6.14	0.000573	7.17e-07	Poorly soluble	-1.31	39.4	0.0493	Soluble	Low	No	Yes	No	No	No	No	No	-10.19	3	3	1	1	4	0.11	0	2	1	8.94
3-O-[alpha-L-rhamnopyranosyl(1->2)-beta-D-glucopyranosyl(1->2)-beta-D-glucuronopyranosyl]olean-12-en-3-beta,22-beta,24-triol methyl ester	O=C1CC[C@@H]2[C@]([C@H]1C)(C)CC[C@H]1[C@@]2(C)CC[C@@]2([C@]1(C)CC[C@@]1([C@H]2CC(C)(C)CC1)C(=O)O)C	C30H48O3	456.7	33	0	0.93	1	3	1	136.17	54.37	3.81	8.13	7.52	5.82	6.45	6.35	-7.73	8.55e-06	1.87e-08	Poorly soluble	-9.13	3.39e-07	7.42e-10	Poorly soluble	-6.83	6.69e-05	1.47e-07	Poorly soluble	Low	No	No	No	No	No	No	No	-3.31	1	3	0	1	1	0.85	0	0	2	5.12
3-O-[beta-D-glucopyranosyl(1->2)-beta-D-galactopyranosyl(1->2)-beta-D-glucuronopyranosyl]olean-12-en-22-oxo-3-beta,24-diol methyl ester	OCC1=C(C)C[C@@H](OC1=O)[C@H]([C@H]1CC[C@@H]2[C@]1(C)CC[C@H]1[C@H]2C[C@@H]2[C@]3([C@]1(C)C(=O)CC[C@@H]3O[C@H]1C(=O)C1(C)C)O2)C	C33H46O7	554.71	40	0	0.85	5	7	1	149.75	102.43	4.33	4.87	4.58	2.91	5.67	4.47	-6.02	0.000533	9.61e-07	Poorly soluble	-6.76	9.73e-05	1.75e-07	Poorly soluble	-5.73	0.00103	1.85e-06	Moderately soluble	High	No	Yes	No	No	No	No	No	-6.23	1	3	0	0	0	0.55	0	1	2	7.34
3-O-[beta-D-glucopyranosyl(1->2)-beta-D-galactopyranosyl(1->2)-beta-D-glucuronopyranosyl]olean-12-en-3-beta,22-beta,24-triol	O[C@H]1[C@H]2[C@H](OC(=O)C2=C)C[C@@]2([C@@H]1[C@](C)(O)CCC2)C	C15H22O4	266.33	19	0	0.8	0	4	2	70.79	66.76	-0.33	1.63	1.41	1.71	1.84	1.25	-2.52	0.808	0.00303	Soluble	-2.64	0.604	0.00227	Soluble	-1.9	3.32	0.0125	Soluble	High	Yes	Yes	No	No	No	No	No	-6.77	0	0	0	0	0	0.55	0	1	0	4.34
3-O-[beta-D-glucopyranosyl(1->2)-beta-D-galactopyranosyl(1->2)-beta-D-glucuronopyranosyl]olean-12-en-3-beta,22-beta,24-triol methyl ester	OC[C@H]1C[C@@H](Oc2ccc(cc2/C=C/C(OC)(C)C)C(=O)C)[C@@H]([C@@H]([C@@H]1O)O)O	C21H30O7	394.46	28	6	0.57	7	7	4	104.95	116.45	2.63	0.93	1.06	-0.13	1.85	1.27	-2.57	1.07	0.0027	Soluble	-2.96	0.431	0.00109	Soluble	-2.06	3.43	0.00869	Soluble	High	No	Yes	No	No	No	No	No	-8.05	0	0	0	0	0	0.55	0	0	1	4.87
3-O-[beta-D-glucopyranosyl(1->2)-beta-D-glucuronopyranosyl]olean-12-en-3-beta,22-beta,24-triol	COC(=O)[C@@H]1[C@@H](c2ccccc2)[C@]2([C@]([C@@H]1O)(O)c1c(O2)cc(cc1OC)OC)c1ccc2c(c1)OCO2	C28H26O9	506.5	37	18	0.32	6	9	2	129.1	112.91	4	3.06	2.64	1.66	3.54	2.98	-4.87	0.0068	1.34e-05	Moderately soluble	-5.1	0.00404	7.99e-06	Moderately soluble	-6.59	0.000131	2.58e-07	Poorly soluble	High	No	No	No	No	Yes	Yes	Yes	-7.22	1	1	0	0	0	0.55	0	0	1	5.34
3-oxo-friedelan-28-oic acid	COc1cc(cc(c1O)OC)[C@H]1[C@H]2C(=O)OC[C@@H]2Cc2c1cc1OCOc1c2	C21H20O7	384.38	28	12	0.38	3	7	1	98.22	83.45	2.95	2.79	2.62	2	3.26	2.72	-4.1	0.0305	7.94e-05	Moderately soluble	-4.2	0.0243	6.33e-05	Moderately soluble	-4.88	0.00506	1.32e-05	Moderately soluble	High	No	No	No	No	Yes	Yes	Yes	-6.66	0	0	0	0	0	0.55	0	0	1	4.2
4-(1-hydroxy-2,2-dimethylcyclpropanone)-2,3-dihydrowithaferin A	CCCCCCCCCCCC[C@H]([C@H]1CC[C@@H](O1)[C@@H](CCCCC[C@@H](CCCCCCC1=C[C@@H](OC1=O)C)O)O)O	C35H64O6	580.88	41	0	0.91	26	6	3	171.51	96.22	7.28	9.94	8.09	4.26	9.63	7.84	-7.99	5.98e-06	1.03e-08	Poorly soluble	-11.89	7.54e-10	1.3e-12	Insoluble	-8.35	2.59e-06	4.47e-09	Poorly soluble	Low	No	Yes	No	No	No	No	No	-2.79	2	4	1	1	2	0.17	0	0	3	7.09
4-alpha,6-alpha-dihydroxyeudesman-8-beta,12-olide	CCCCCCCCCC[C@H]([C@H]1CC[C@@H](O1)[C@H]1CC[C@@H](O1)[C@@H](CCCCCCCCCCCCC1=C[C@@H](OC1=O)C)O)O	C37H66O6	606.92	43	0	0.92	25	6	2	178.94	85.22	7.73	11.23	8.89	4.61	10	8.49	-9.03	5.69e-07	9.38e-10	Poorly soluble	-12.99	6.15e-11	1.01e-13	Insoluble	-8.83	9.06e-07	1.49e-09	Poorly soluble	Low	No	Yes	No	No	No	No	Yes	-2.03	2	4	1	1	3	0.17	0	0	3	7.39
4-beta-D-(glucopyranosyloxy)-3-[3-methoxy-trans-isopenten-1-yl]acetophenone	CCCCCCCCCCCC[C@H]([C@H]1CC[C@@H](O1)[C@@H](CC[C@@H]([C@@H]1CC[C@H](O1)CCCCCCCC1=C[C@@H](OC1=O)C)O)O)O	C37H66O7	622.92	44	0	0.92	25	7	3	180.1	105.45	6.1	9.7	7.86	3.81	9.23	7.34	-8.16	4.28e-06	6.87e-09	Poorly soluble	-11.83	9.19e-10	1.47e-12	Insoluble	-7.87	8.35e-06	1.34e-08	Poorly soluble	Low	No	No	No	No	No	No	Yes	-3.21	1	4	1	1	3	0.55	0	0	3	7.51
4'-demethoxy-3',4'-methylene-dioxy-methyl rocaglate	Oc1ccc(cc1)[C@@H]1CC(=O)c2c(O1)cc1c(c2O)C([C@H](O1)C)(C)C	C20H20O5	340.37	25	12	0.35	1	5	2	93.2	75.99	2.9	4.06	3.54	1.9	3.71	3.22	-4.8	0.00543	1.59e-05	Moderately soluble	-5.36	0.00149	4.36e-06	Moderately soluble	-5.17	0.0023	6.75e-06	Moderately soluble	High	Yes	Yes	Yes	Yes	Yes	Yes	Yes	-5.49	0	0	0	0	0	0.55	0	0	1	3.91
4'-demethyldeoxypodophyllotoxin	COc1cc2O[C@@H]([C@@H](Cc2c(c1)OC)O)c1ccc(c(c1)OC)O	C18H20O6	332.35	24	12	0.33	4	6	2	87.74	77.38	3.18	1.34	2.13	0.97	2.55	2.03	-2.85	0.469	0.00141	Soluble	-2.57	0.901	0.00271	Soluble	-4.23	0.0196	5.9e-05	Moderately soluble	High	No	Yes	No	No	No	Yes	No	-7.38	0	0	0	0	0	0.55	0	0	0	3.89
4-deoxyannoreticuin	COc1cc2O[C@@H]([C@@H](Cc2c(c1)OC)O)c1ccc2c(c1)OCO2	C18H18O6	330.33	24	12	0.33	3	6	1	85.29	66.38	3.39	2.59	2.15	1.38	2.86	2.47	-3.69	0.0672	0.000203	Soluble	-3.63	0.0769	0.000233	Soluble	-4.43	0.0123	3.72e-05	Moderately soluble	High	Yes	Yes	Yes	No	No	Yes	Yes	-6.48	0	0	0	0	0	0.55	0	0	0	3.97
4-deoxyasimicin	COc1cc(ccc1OC)c1oc2c(OC)c(OC)c(c(c2c(=O)c1O)O)OC	C20H20O9	404.37	29	16	0.25	6	9	2	104.43	116.82	3.58	3.09	2.91	-0.4	3.27	2.49	-4.31	0.02	4.94e-05	Moderately soluble	-5.21	0.00249	6.15e-06	Moderately soluble	-5.54	0.00118	2.91e-06	Moderately soluble	High	No	No	No	No	Yes	No	Yes	-6.57	0	0	0	0	0	0.55	0	0	1	3.86
4-deoxygigantecin	COc1ccc(cc1OC)c1cc(=O)c2c(o1)cc(c(c2O)OC)OC	C19H18O7	358.34	26	16	0.21	5	7	1	95.91	87.36	3.45	3.72	3.2	0.4	3.66	2.89	-4.53	0.0106	2.95e-05	Moderately soluble	-5.25	0.00203	5.68e-06	Moderately soluble	-6.02	0.000343	9.57e-07	Poorly soluble	High	No	No	Yes	No	Yes	Yes	Yes	-5.84	0	0	0	0	0	0.55	0	0	2	3.54
5,4’-Dihydroxy-4”,4”-dimethyl-5”-methyl-5”-H-dihydrofuruno[2”,3”:6,7]flavonone	CC(=O)C1=C(N)C(=O)c2c(C1=O)cccc2O	C12H9NO4	231.2	17	6	0.08	1	4	2	58.79	97.46	1.1	1.62	0.57	-0.89	1.36	0.75	-2.49	0.749	0.00324	Soluble	-3.28	0.122	0.000526	Soluble	-2.66	0.501	0.00217	Soluble	High	No	No	Yes	No	No	No	No	-6.56	0	0	0	0	0	0.55	1	1	1	2.62
5,7,3'-tri-O-methyl(-)-epicatechin	CC(=CCc1cc(cc(c1O)CC=C(C)C)[C@H]1CC(=O)c2c(O1)c(CC=C(C)C)c(cc2O)O)C	C30H36O5	476.6	35	12	0.37	7	5	3	142.73	86.99	4.23	8.17	6.71	3.74	7.41	6.05	-7.73	8.8e-06	1.85e-08	Poorly soluble	-9.86	6.64e-08	1.39e-10	Poorly soluble	-7.07	4.03e-05	8.45e-08	Poorly soluble	Low	No	Yes	No	No	No	No	Yes	-3.41	0	3	0	1	1	0.55	0	1	2	4.71
5,7-dimethyl-3',4'-methylene(-)-epicatechin	COc1cc2c(c(c1O)Oc1ccc(cc1)C[C@@H]1N(C)CCc3c1cc(OC)c(c3O)OC)C[C@H]1c3c2c(OC)c(OC)cc3CCN1C	C39H44N2O8	668.78	49	24	0.38	9	10	2	195.53	102.32	5.58	6.02	5.05	2.62	6.26	5.11	-7.55	1.9e-05	2.83e-08	Poorly soluble	-7.95	7.56e-06	1.13e-08	Poorly soluble	-10.1	5.28e-08	7.89e-11	Insoluble	High	No	No	No	No	No	No	No	-6.11	1	3	0	0	2	0.55	0	0	3	5.93
5-desmethylnobiletin			0	0	0	0.38	0	10	2	0	0	5.58	6.02	5.05	2.62	6.26	5.11	-7.55	1.9e-05	2.83e-08	Poorly soluble	-7.95	7.56e-06	1.13e-08	Poorly soluble	-10.1	5.28e-08	7.89e-11	Insoluble	High	No	No	No	No	No	No	No	-6.11	1	3	0	0	2	0.55	0	0	3	5.93
5-desmethylsinensetin	OC[C@H]1O[C@@H](Oc2cc(OC)cc3c2c(cc(=O)o3)c2ccc(cc2)O)[C@@H]([C@H]([C@@H]1O)O)O	C22H22O10	446.4	32	16	0.32	5	10	5	110.58	159.05	2.05	0.1	0.35	-0.58	0.89	0.56	-2.71	0.869	0.00195	Soluble	-3	0.452	0.00101	Soluble	-3.38	0.185	0.000415	Soluble	Low	No	No	No	No	No	No	No	-8.95	0	0	1	1	1	0.55	0	1	1	5.27
5-hydroxy-3-amino-2-aceto-1,4-naphthoquinone	C=CC(c1c(O)cc2c(c1O)C(=O)C[C@H](O2)c1ccc(c(c1)O)O)(C)C	C20H20O6	356.37	26	12	0.25	3	6	4	97.2	107.22	2.52	3.97	3.35	1.28	3.27	2.88	-4.69	0.00721	2.02e-05	Moderately soluble	-5.92	0.000426	1.2e-06	Moderately soluble	-4.07	0.0304	8.53e-05	Moderately soluble	High	No	No	Yes	No	Yes	Yes	Yes	-5.66	0	0	0	0	0	0.55	1	2	2	3.68
5-hydroxysophoranone	C=CC(c1c(O)cc2c(c1O)C(=O)C[C@@H](O2)c1ccc(cc1)O)(C)C	C20H20O5	340.37	25	12	0.25	3	5	3	95.17	86.99	2.65	4.47	3.65	1.82	3.75	3.27	-4.92	0.00406	1.19e-05	Moderately soluble	-6.02	0.000328	9.63e-07	Poorly soluble	-4.65	0.00755	2.22e-05	Moderately soluble	High	No	No	Yes	No	Yes	Yes	Yes	-5.2	0	0	0	0	0	0.55	0	1	1	3.59
5'-hydroxythalifaboramine	CC(/C=C/c1c2O[C@@H](CC(=O)c2c(c(c1O)C[C@@H](C(=C)C)O)O)c1ccc(c(c1)O)O)C	C25H28O7	440.49	32	12	0.32	6	7	5	122.99	127.45	3.5	4.68	3.93	1.48	4.46	3.61	-5.4	0.00175	3.97e-06	Moderately soluble	-7.08	3.63e-05	8.24e-08	Poorly soluble	-4.35	0.0195	4.44e-05	Moderately soluble	High	No	No	No	No	Yes	No	Yes	-5.66	0	0	0	0	0	0.55	1	2	2	4.7
5-O-beta-D-galactopyranosyl-4-(4-hydroxyphenyl)-7-methoxy-2H-chromen-2-one	CC(/C=C/c1c2O[C@@H](CC(=O)c2c(c(c1O)/C=C/C(C)C)O)c1ccc(c(c1)O)O)C	C25H28O6	424.49	31	12	0.32	5	6	4	122.62	107.22	3.92	5.57	5.01	2.28	5.04	4.36	-5.94	0.00049	1.16e-06	Moderately soluble	-7.58	1.11e-05	2.61e-08	Poorly soluble	-4.57	0.0115	2.7e-05	Moderately soluble	High	No	No	No	No	Yes	No	Yes	-4.93	0	0	0	0	1	0.55	1	1	2	4.38
5-O-beta-D-glucopyranosyl-4-(4-hydroxyphenyl)-7-methoxy-2H-chromen-2-one	C[C@@H]1C[C@@H]2OC(=O)C(=C)[C@H]2[C@@H]([C@]2([C@H]1[C@@H](O)C[C@H]2O)C)O	C15H22O5	282.33	20	0	0.8	0	5	3	71.91	86.99	1.74	0.72	0.23	0.88	0.55	0.82	-2.04	2.55	0.00904	Soluble	-2.13	2.12	0.0075	Soluble	-0.64	64.1	0.227	Soluble	High	No	Yes	No	No	No	No	No	-7.51	0	0	0	0	0	0.55	0	1	0	4.54
6-(1,1-Dimethylallyl)eriodictyol	COc1cc2c(c(c1O)Oc1ccc(cc1)C[C@@H]1N(C)CCc3c1cc(OC)c(c3)O)C[C@H]1c3c2c(OC)c(OC)cc3CCN1C	C38H42N2O7	638.75	47	24	0.37	8	9	2	189.04	93.09	5.41	6.05	5.04	2.95	6.17	5.12	-7.46	2.21e-05	3.45e-08	Poorly soluble	-7.78	1.05e-05	1.64e-08	Poorly soluble	-10.02	6.13e-08	9.59e-11	Insoluble	High	No	No	No	No	No	No	No	-5.9	1	3	0	0	2	0.55	0	0	3	5.76
6-(1,1-Dimethylallyl)naringenin	CO[C@H]1[C@@H](Oc2c1cc(C(=O)C)c(c2)O)C(=C)C	C14H16O4	248.27	18	6	0.36	3	4	1	67.84	55.76	2.47	2.53	2.29	0.91	2.56	2.15	-3.02	0.236	0.000951	Soluble	-3.35	0.112	0.000449	Soluble	-2.96	0.275	0.00111	Soluble	High	Yes	No	Yes	No	No	No	No	-6.02	0	0	0	0	0	0.55	0	1	1	3.45
6-(2-Hydroxy-3-methyl-3-butenyl)-8-prenyl-eriodictyol	COc1cc2O[C@H](Cc2cc1C(=O)C)C(=C)C	C14H16O3	232.28	17	6	0.36	3	3	0	66.42	35.53	2.73	2.88	2.78	1.76	3.45	2.72	-3.16	0.162	0.000696	Soluble	-3.29	0.12	0.000518	Soluble	-3.76	0.0401	0.000173	Soluble	High	Yes	No	Yes	Yes	No	No	No	-5.67	0	0	0	0	0	0.55	0	1	1	2.94
6,8-Diprenyleriodictyol	CC1=CC(=O)c2c(C1(C)C)cc(c(c2C)O)O	C14H16O3	232.28	17	6	0.36	0	3	2	67.14	57.53	1.74	2.67	2.83	1.76	3.08	2.41	-3.22	0.139	0.000598	Soluble	-3.53	0.0686	0.000295	Soluble	-3.54	0.0668	0.000288	Soluble	High	Yes	No	No	No	No	No	No	-5.82	0	0	0	0	0	0.55	1	1	1	2.75
6-alpha-hydroxyneopulchellin	COc1cc(O)c2c(c1Oc1ccc(cc1)c1cc(=O)c3c(o1)cc(cc3O)OC)oc(cc2=O)c1ccc(cc1)O	C32H22O10	566.51	42	32	0.06	6	10	3	154.97	148.8	3.72	5.95	6.16	0.89	5.73	4.49	-7.27	3.05e-05	5.39e-08	Poorly soluble	-8.85	8e-07	1.41e-09	Poorly soluble	-10.39	2.31e-08	4.08e-11	Insoluble	Low	No	No	No	Yes	Yes	No	No	-5.53	1	3	1	2	1	0.55	0	0	2	4.37
6'-desmethylthalifaboramine	COc1cc(O)c2c(c1c1c(O)cc3c(c1O)c(=O)cc(o3)c1ccc(cc1)O)oc(cc2=O)c1ccc(cc1)O	C31H20O10	552.48	41	32	0.03	4	10	5	151.44	170.8	3.64	5.36	5.44	0.44	5.16	4.01	-6.96	6.12e-05	1.11e-07	Poorly soluble	-8.7	1.1e-06	1.99e-09	Poorly soluble	-9.39	2.26e-07	4.08e-10	Poorly soluble	Low	No	No	No	No	Yes	No	No	-5.86	1	2	1	1	2	0.55	0	0	2	4.29
6-hydroxy-3-methoxytremetone	O=C1CC[C@@](C=C1)(O)C/C=C/c1ccccc1	C15H16O2	228.29	17	6	0.27	3	2	1	68.99	37.3	2.44	2.21	2.63	2.28	3.28	2.57	-2.71	0.444	0.00195	Soluble	-2.63	0.538	0.00236	Soluble	-3.4	0.0907	0.000397	Soluble	High	Yes	No	No	Yes	No	No	No	-6.12	0	0	0	0	0	0.55	0	0	1	3.27
6-methoxy-tremetone	C=C1C(=O)O[C@@H]2[C@H]1[C@@H](O)[C@]1(C)C(=O)C=C[C@H]1[C@@H](C2)C	C15H18O4	262.3	19	0	0.6	0	4	1	69.32	63.6	1.77	0.61	1.25	1.53	1.63	1.36	-1.85	3.7	0.0141	Very soluble	-1.52	7.93	0.0302	Very soluble	-1.68	5.46	0.0208	Soluble	High	Yes	No	No	No	No	No	No	-7.47	0	0	0	0	0	0.55	0	1	0	4.58
6-oxo-pristimerol	OCC1O[C@@H](O[C@H]2CC[C@]3([C@](C2)(O)CCC2C3CC[C@]3([C@]2(O)CC[C@@H]3C2=CC(=O)OC2)C)C=O)C(C([C@@H]1O)O)O	C29H42O11	566.64	40	0	0.86	5	11	6	138.54	183.21	2.54	-0.98	-0.28	-0.45	0.51	0.27	-2.41	2.23	0.00393	Soluble	-2.38	2.35	0.00415	Soluble	-0.87	77.1	0.136	Soluble	Low	No	Yes	No	No	No	No	No	-10.45	3	3	1	1	3	0.17	0	2	1	6.89
7,7''-dimethyllanaraflavone	O=C1OC2C(C1=C)CC(O)C1(C)OC1CCC1(C2O1)C	C15H20O5	280.32	20	0	0.8	0	5	1	69.98	71.59	2.21	0.72	0.94	0.88	2.08	1.37	-2.03	2.61	0.0093	Soluble	-1.8	4.43	0.0158	Very soluble	-1.72	5.37	0.0191	Soluble	High	No	Yes	No	No	No	No	No	-7.5	0	0	0	0	0	0.55	0	2	0	4.99
7''-methylagathisflavone			0	0	0	0.8	0	5	1	0	0	2.21	0.72	0.94	0.88	2.08	1.37	-2.03	2.61	0.0093	Soluble	-1.8	4.43	0.0158	Very soluble	-1.72	5.37	0.0191	Soluble	High	No	Yes	No	No	No	No	No	-7.5	0	0	0	0	0	0.55	0	2	0	4.99
candenatenin B	O=C1OC2C(C1=C)CC(O)C1(C)OC1CCC1(C2O1)C	C15H20O5	280.32	20	0	0.8	0	5	1	69.98	71.59	2.21	0.72	0.94	0.88	2.08	1.37	-2.03	2.61	0.0093	Soluble	-1.8	4.43	0.0158	Very soluble	-1.72	5.37	0.0191	Soluble	High	No	Yes	No	No	No	No	No	-7.5	0	0	0	0	0	0.55	0	2	0	4.99
8-epi-helenalin	O=C1O[C@H]2[C@@H](C1=C)C[C@@H](O)[C@]1(C)O[C@@H]1CC[C@@]1([C@@H]2O1)C	C15H20O5	280.32	20	0	0.8	0	5	1	69.98	71.59	2.91	0.72	0.94	0.88	2.08	1.51	-2.03	2.61	0.0093	Soluble	-1.8	4.43	0.0158	Very soluble	-1.72	5.37	0.0191	Soluble	High	No	No	No	No	No	No	No	-7.5	0	0	0	0	0	0.55	0	2	0	4.99
glucostrophanthidin	CC(c1cc2c(o1)C(=O)c1c(C2=O)cccc1)O	C14H10O4	242.23	18	11	0.14	1	4	1	62.95	67.51	1.91	1.82	1.78	0.17	2.98	1.73	-2.87	0.323	0.00133	Soluble	-2.86	0.336	0.00139	Soluble	-4.32	0.0115	4.74e-05	Moderately soluble	High	Yes	No	Yes	No	No	No	No	-6.49	0	0	0	0	0	0.55	1	0	1	3.66
9-alpha-hydroxy-1-beta,10-alpha-epoxyparthenolide			0	0	0		0			0	0
9-alpha-hydroxyparthenolide	CCCCCCCCCCCCC[C@H]1C[C@@H](O)C[C@@]2(O1)CC[C@@]1(O2)C=CC(=O)C=C1	C26H42O4	418.61	30	0	0.81	12	4	1	123.41	55.76	5.02	7.27	6.17	3.68	6.04	5.63	-6.22	0.00025	5.98e-07	Poorly soluble	-8.27	2.27e-06	5.42e-09	Poorly soluble	-6.01	0.000408	9.75e-07	Poorly soluble	High	No	No	No	No	No	Yes	Yes	-3.69	0	2	1	1	1	0.55	0	0	3	6.82
9-beta-hydroxy-1-beta,10-alpha-epoxyparthenolide	CCCCCCCCCCC[C@@H]1C[C@H](O)C[C@]2(O1)CC[C@@]1(O2)C=CC(=O)C=C1	C24H38O4	390.56	28	0	0.79	10	4	1	113.8	55.76	4.76	6.19	5.39	3.27	5.22	4.96	-5.5	0.00123	3.15e-06	Moderately soluble	-7.15	2.79e-05	7.15e-08	Poorly soluble	-5.23	0.00232	5.94e-06	Moderately soluble	High	Yes	No	No	No	No	Yes	Yes	-4.29	0	0	0	0	1	0.55	0	0	3	6.59
9-beta-hydroxyparthenolide	CCCCCCCCCCC[C@@H]1C[C@@H](O)C[C@@]2(O1)CC[C@@]1(O2)C=CC(=O)C=C1	C24H38O4	390.56	28	0	0.79	10	4	1	113.8	55.76	4.86	6.19	5.39	3.27	5.22	4.98	-5.5	0.00123	3.15e-06	Moderately soluble	-7.15	2.79e-05	7.15e-08	Poorly soluble	-5.23	0.00232	5.94e-06	Moderately soluble	High	Yes	No	No	No	No	Yes	Yes	-4.29	0	0	0	0	1	0.55	0	0	3	6.59
2-acetylfuro-1,4-naphthoquinone	CCCCCCCCCCCCC[C@@H]1C[C@@H](O)C[C@]2(O1)CC[C@@]1(O2)C=CC(=O)C[C@@H]1O	C26H44O5	436.62	31	0	0.88	12	5	2	125.05	75.99	4.48	6.09	5.36	2.95	5.56	4.89	-5.59	0.00112	2.56e-06	Moderately soluble	-7.47	1.49e-05	3.42e-08	Poorly soluble	-5.66	0.000964	2.21e-06	Moderately soluble	High	No	No	No	No	No	Yes	No	-4.64	0	1	1	0	1	0.55	0	0	3	6.98
Aculeatin A	C/C=C/c1cc(OC)c2c(c1)[C@H](C)[C@H](O2)c1ccc(c(c1)OC)OC	C21H24O4	340.41	25	12	0.33	5	4	0	99.45	36.92	4.13	4.71	4.55	2.95	4.91	4.25	-4.94	0.00388	1.14e-05	Moderately soluble	-5.21	0.00208	6.11e-06	Moderately soluble	-5.96	0.000374	1.1e-06	Moderately soluble	High	Yes	No	No	Yes	Yes	Yes	Yes	-5.03	0	0	0	0	0	0.55	0	0	1	4.05
Aculeatin B	Oc1ccc(cc1)c1cc(=O)c2c(o1)cc(c(c2O)c1c(O)cc(c2c1oc(cc2=O)c1ccc(cc1)O)O)O	C30H18O10	538.46	40	32	0	3	10	6	146.97	181.8	3.02	5.04	5.13	0.25	4.61	3.61	-6.75	9.63e-05	1.79e-07	Poorly soluble	-8.6	1.36e-06	2.52e-09	Poorly soluble	-8.7	1.07e-06	1.98e-09	Poorly soluble	Low	No	No	No	No	No	No	No	-6.01	2	2	1	1	3	0.17	0	0	2	4.17
Aculeatin E	CO[C@@H]1O[C@H](C[C@H]1[C@@H]1CC=C2[C@]1(C)CC[C@H]1[C@@]2(C)[C@@H](O)C[C@@H]2[C@]1(C)CC[C@@H](C2(C)C)O)[C@H](C(O)(C)C)O	C31H52O6	520.74	37	0	0.94	4	6	4	145.9	99.38	4.31	4.36	4.43	3.22	3.77	4.02	-5.55	0.00146	2.81e-06	Moderately soluble	-6.16	0.000358	6.88e-07	Poorly soluble	-3.74	0.095	0.000182	Soluble	High	No	Yes	No	No	No	No	No	-6.38	1	3	0	0	0	0.55	0	1	2	7.38
Aculeatin F	COc1ccc(cc1)[C@]12Oc3c([C@]2(O)[C@@H]([C@@H]([C@H]1c1ccccc1)C(=O)OC)O)c(OC)cc(c3)OC	C28H28O8	492.52	36	18	0.32	7	8	2	129.53	103.68	4.27	3.22	2.92	1.76	3.77	3.19	-4.83	0.00728	1.48e-05	Moderately soluble	-5.07	0.00419	8.51e-06	Moderately soluble	-6.98	5.18e-05	1.05e-07	Poorly soluble	High	No	Yes	No	No	No	Yes	Yes	-7.02	0	1	0	0	0	0.55	0	0	1	5.18
Aculeatol E	CCCCCCCCCCCCCCCc1cc(O)cc(c1)O	C21H36O2	320.51	23	6	0.71	14	2	2	102.75	40.46	4.53	9.05	6.73	4.88	6.74	6.39	-6.8	5.11e-05	1.59e-07	Poorly soluble	-9.79	5.17e-08	1.61e-10	Poorly soluble	-7.28	1.68e-05	5.25e-08	Poorly soluble	High	No	No	Yes	Yes	No	Yes	No	-1.83	1	1	1	1	1	0.55	0	0	2	2.6
Acuminatin	CCCCCC/C=C/CCCCCCCc1cc(O)cc(c1)O	C21H34O2	318.49	23	6	0.62	13	2	2	102.28	40.46	4.52	8.12	6.51	4.79	6.56	6.1	-6.27	0.000173	5.43e-07	Poorly soluble	-8.83	4.74e-07	1.49e-09	Poorly soluble	-6.56	8.75e-05	2.75e-07	Poorly soluble	High	No	No	Yes	Yes	No	Yes	No	-2.48	1	1	1	1	1	0.55	0	1	2	2.91
Agathisflavone	CCCCCC=CCC=CCCCCCCCc1cc(O)cc(c1)O	C23H36O2	344.53	25	6	0.57	14	2	2	111.42	40.46	4.66	8.51	7.06	5.13	7.23	6.52	-6.59	8.84e-05	2.56e-07	Poorly soluble	-9.23	2.02e-07	5.87e-10	Poorly soluble	-6.64	7.97e-05	2.31e-07	Poorly soluble	Low	No	No	Yes	Yes	No	Yes	No	-2.36	1	1	1	1	1	0.55	0	1	2	3.16
Agladupol A			0	0	0	0.57	0	2	2	0	0	4.66	8.51	7.06	5.13	7.23	6.52	-6.59	8.84e-05	2.56e-07	Poorly soluble	-9.23	2.02e-07	5.87e-10	Poorly soluble	-6.64	7.97e-05	2.31e-07	Poorly soluble	Low	No	No	Yes	Yes	No	Yes	No	-2.36	1	1	1	1	1	0.55	0	1	2	3.16
Aglafolin	C[C@@H]1CC[C@]2([C@@H]([C@H]1C)C1=CC[C@H]3[C@@]([C@@]1(CC2)C)(C)CC[C@@H]1[C@]3(C)CC[C@@H](C1(C)C)O)C	C30H50O	426.72	31	0	0.93	0	1	1	135.14	20.23	4.8	9.01	8.02	6.92	6.52	7.06	-8.16	2.94e-06	6.89e-09	Poorly soluble	-9.33	2.02e-07	4.72e-10	Poorly soluble	-6.71	8.23e-05	1.93e-07	Poorly soluble	Low	No	No	No	No	No	No	No	-2.51	1	3	0	1	2	0.55	0	1	2	6.17
Alkylresorcinol A	OC[C@]1(C)[C@H](CC[C@]2([C@H]1CC[C@@]1([C@@H]2CC=C2[C@@]1(C)CC[C@@]1([C@H]2CC(CC1)(C)C)C(=O)O)C)C)O[C@@H]1OC[C@@H]([C@@H]([C@H]1O[C@@H]1O[C@@H](C)[C@@H]([C@H]([C@H]1O)O)O)O)O	C41H66O12	750.96	53	0	0.93	6	12	7	195.45	195.6	3.88	3.64	3.52	1.46	2.17	2.93	-6.39	0.000304	4.04e-07	Poorly soluble	-7.44	2.75e-05	3.66e-08	Poorly soluble	-2.93	0.89	0.00119	Soluble	Low	No	Yes	No	No	No	No	No	-8.3	3	3	1	1	4	0.11	0	2	2	8.75
Alkylresorcinol B	CC1=CCC(C)(C)C=CCC(=CCC1)C	C15H24	204.35	15	0	0.6	0	0	0	70.42	0	3.27	4.55	5.04	4.53	3.91	4.26	-3.97	0.0217	0.000106	Soluble	-4.27	0.0109	5.34e-05	Moderately soluble	-3.52	0.0619	0.000303	Soluble	Low	No	No	No	No	Yes	No	No	-4.32	1	0	0	0	1	0.55	0	1	2	3.66
Alkylresorcinol C	COc1c(O)cc2c(c1CC=C(C)C)c(=O)c1c(o2)cc(c(c1O)CC=C(C)C)O	C24H26O6	410.46	30	14	0.29	5	6	3	119.99	100.13	4.14	6.27	5.09	2.19	5.52	4.64	-6.35	0.000183	4.46e-07	Poorly soluble	-8.16	2.84e-06	6.91e-09	Poorly soluble	-6.14	0.000297	7.23e-07	Poorly soluble	High	No	No	No	No	Yes	No	No	-4.35	0	0	0	0	1	0.55	0	2	2	3.91
Allicin	CC1=CC[C@H]2C[C@@H]1C2(C)C	C10H16	136.23	10	0	0.8	0	0	0	45.22	0	2.63	4.48	3	4.29	2.79	3.44	-3.51	0.0424	0.000311	Soluble	-4.2	0.00859	6.31e-05	Moderately soluble	-2.23	0.806	0.00592	Soluble	Low	Yes	No	No	No	Yes	No	No	-3.95	1	1	0	0	2	0.55	0	1	2	4.44
Alpha-amyrin	CC1=CC[C@@H](CC1)C(O)(C)C	C10H18O	154.25	11	0	0.8	1	1	1	48.8	20.23	2.51	3.39	2.5	2.3	2.17	2.58	-2.87	0.21	0.00136	Soluble	-3.49	0.0495	0.000321	Soluble	-1.69	3.17	0.0206	Soluble	High	Yes	No	No	No	No	No	No	-4.83	0	1	0	0	2	0.55	0	1	1	3.24
Alpha-hederin	CC=C(C(=O)O[C@H](C(=C)c1cc(O)c(c(c1OC(=O)C)O)C)CC=C(C)C)C	C22H28O6	388.45	28	6	0.36	9	6	2	110.26	93.06	2.94	5.24	4.58	3.2	4.7	4.13	-5.11	0.00299	7.69e-06	Moderately soluble	-6.94	4.43e-05	1.14e-07	Poorly soluble	-3.96	0.0425	0.000109	Soluble	High	No	No	No	No	Yes	No	Yes	-4.95	0	0	0	0	1	0.55	0	3	3	4.25
Alpha-Humulene	CC=C(C(=O)O[C@H](C(=C)c1ccc(c(c1O)O)C)CC=C(C)C)C	C20H26O4	330.42	24	6	0.35	7	4	2	98.76	66.76	3.42	5.49	4.65	3.4	4.59	4.31	-5.07	0.00281	8.51e-06	Moderately soluble	-6.65	7.39e-05	2.24e-07	Poorly soluble	-3.92	0.0393	0.000119	Soluble	High	Yes	No	No	Yes	Yes	No	Yes	-4.42	0	0	0	0	1	0.55	1	3	1	3.85
Alpha-Mangostin	CC=C(C(=O)O[C@H](C(=C)[C@@H]1C[C@@H]2O[C@@]2(C(=O)[C@H]1OC(=O)C)C)CC=C(C)C)C	C22H30O6	390.47	28	0	0.59	9	6	0	106.11	82.2	3.21	4.11	3.46	2.16	4.46	3.48	-4.26	0.0216	5.54e-05	Moderately soluble	-5.54	0.00112	2.87e-06	Moderately soluble	-3.18	0.259	0.000664	Soluble	High	No	No	No	No	Yes	Yes	Yes	-5.76	0	0	0	0	0	0.55	0	4	3	5.19
Alpha-Pinene	CC=C(C(=O)O[C@H]1[C@@H](C(=C)[C@@H](C[C@@H]2OC2(C)C)OC(=O)C(=CC)C)[C@H](OC(=O)C)C(=O)[C@@]2([C@H]1O2)C)C	C27H36O9	504.57	36	0	0.63	12	9	0	130.44	121.03	3.53	3.61	3.15	1.57	4.92	3.36	-4.45	0.0179	3.54e-05	Moderately soluble	-5.84	0.000731	1.45e-06	Moderately soluble	-3.35	0.227	0.00045	Soluble	High	No	No	No	No	No	Yes	No	-6.81	1	3	1	0	0	0.55	0	4	3	5.95
Alpha-Terpineol	Oc1ccc(cc1)c1cc(=O)c2c(o1)c(c(cc2O)O)c1cc(ccc1O)c1cc(=O)c2c(o1)cc(cc2O)O	C30H18O10	538.46	40	32	0	3	10	6	146.97	181.8	3.06	5.04	5.13	0.25	4.61	3.62	-6.75	9.63e-05	1.79e-07	Poorly soluble	-8.6	1.36e-06	2.52e-09	Poorly soluble	-8.7	1.07e-06	1.98e-09	Poorly soluble	Low	No	No	No	No	No	No	No	-6.01	2	2	1	1	3	0.17	0	0	2	4.27
Alpha-tomatine	CCCCCCCCCCCCCCC[C@H](C[C@@]1(OC)CC[C@@]2(O1)C=CC(=O)C=C2)O	C27H46O4	434.65	31	0	0.81	17	4	1	130.33	55.76	5.48	8.16	6.81	3.88	7.26	6.32	-6.55	0.000121	2.79e-07	Poorly soluble	-9.19	2.81e-07	6.46e-10	Poorly soluble	-7	4.37e-05	1e-07	Poorly soluble	High	No	Yes	Yes	No	No	No	No	-3.16	0	3	1	1	2	0.55	0	0	3	6.51
Altaicalarins A	CC(=CCc1c2O[C@H](CC(=O)c2c(c(c1O)CC=C(C)C)O)c1cc(O)c2c(c1)C=CC(O2)(C)C)C	C30H34O6	490.59	36	12	0.37	5	6	3	143.13	96.22	4.49	7.17	6.28	3.19	6.56	5.54	-7.32	2.37e-05	4.84e-08	Poorly soluble	-9.01	4.77e-07	9.72e-10	Poorly soluble	-6.66	0.000109	2.21e-07	Poorly soluble	Low	No	Yes	No	No	Yes	No	Yes	-4.2	0	3	0	1	1	0.55	0	1	2	5.15
Altaicalarins B	CC(=CCc1c2OC(C)(C)C=Cc2c2c(c1O)c(=O)c1c(o2)c(O)ccc1)C	C23H22O5	378.42	28	14	0.26	2	5	2	111.88	79.9	3.69	5.65	4.94	2.52	5.1	4.38	-5.98	0.000393	1.04e-06	Moderately soluble	-7.09	3.06e-05	8.09e-08	Poorly soluble	-6.21	0.000233	6.15e-07	Poorly soluble	High	No	No	No	Yes	Yes	No	No	-4.6	0	0	0	0	1	0.55	0	2	2	4.14
Altaicalarins C	CCCCCCCCCC[C@@H]([C@H]1CC[C@@H](O1)[C@H]1CC[C@@H](O1)[C@@H](CCCC[C@@H](CCCCC[C@H](CC1=C[C@@H](OC1=O)C)O)O)O)O	C37H66O8	638.92	45	0	0.92	25	8	4	181.26	125.68	6.69	7.81	6.83	3.02	8.47	6.57	-7.07	5.42e-05	8.48e-08	Poorly soluble	-10.29	3.24e-08	5.07e-11	Insoluble	-6.92	7.68e-05	1.2e-07	Poorly soluble	Low	No	No	No	No	No	No	Yes	-4.65	1	4	1	1	3	0.55	0	0	3	7.76
Altaicalarins D	CCCCCCCCCC[C@@H](C[C@H]([C@H]1CC[C@@H](O1)[C@@H](CCC(=O)CCC[C@@H](CCCCCC1=C[C@@H](OC1=O)C)O)O)O)O	C35H62O8	610.86	43	0	0.89	26	8	4	172.87	133.52	6.39	6.75	6.24	2.57	8.45	6.08	-6.16	0.000419	6.86e-07	Poorly soluble	-9.36	2.67e-07	4.37e-10	Poorly soluble	-6.92	7.28e-05	1.19e-07	Poorly soluble	Low	No	No	No	No	No	No	Yes	-5.23	1	4	1	2	3	0.55	0	0	3	7.32
Amentoflavone	CCCCCCCCCCCC[C@H]([C@@H]1CC[C@@H](O1)[C@@H](CCC[C@H]([C@@H](CCCCC[C@H](CC1=C[C@@H](OC1=O)C)O)O)O)O)O	C35H64O8	612.88	43	0	0.91	26	8	5	173.84	136.68	6.91	7.44	6.03	2.67	8.12	6.23	-6.61	0.00015	2.45e-07	Poorly soluble	-10.14	4.42e-08	7.21e-11	Insoluble	-6.45	0.000219	3.58e-07	Poorly soluble	Low	No	No	No	No	No	No	Yes	-4.76	1	4	1	2	3	0.55	0	0	3	7.48
Amomol A	CCCCCCCCCCCC[C@H]([C@H]1CC[C@@H](O1)[C@@H](CCCC[C@@H](CCCCC[C@H](CC1=C[C@@H](OC1=O)C)O)O)O)O	C35H64O7	596.88	42	0	0.91	26	7	4	172.67	116.45	6.81	8.42	7.06	3.46	8.88	6.93	-7.13	4.43e-05	7.43e-08	Poorly soluble	-10.73	1.1e-08	1.84e-11	Insoluble	-7.4	2.39e-05	4e-08	Poorly soluble	Low	No	No	No	No	No	No	Yes	-3.96	1	4	1	1	2	0.55	0	0	3	7.36
Amomol B	CCCCCCCCCCCC[C@@H]([C@H]1CC[C@@H](O1)[C@@H](CCCC[C@@H](CCCCC[C@H](CC1=C[C@@H](OC1=O)C)O)O)O)O	C35H64O7	596.88	42	0	0.91	26	7	4	172.67	116.45	6.71	8.42	7.06	3.46	8.88	6.91	-7.13	4.43e-05	7.43e-08	Poorly soluble	-10.73	1.1e-08	1.84e-11	Insoluble	-7.4	2.39e-05	4e-08	Poorly soluble	Low	No	No	No	No	No	No	Yes	-3.96	1	4	1	1	2	0.55	0	0	3	7.36
Amooranin	CCCCCCCCCCCC[C@H]([C@H]1CC[C@@H](O1)[C@@H](CCCCCC(=O)CCCC[C@H](CC1=C[C@@H](OC1=O)C)O)O)O	C35H62O7	594.86	42	0	0.89	26	7	3	171.71	113.29	6.74	7.91	7.27	3.36	9.2	6.9	-6.8	9.53e-05	1.6e-07	Poorly soluble	-10.14	4.32e-08	7.27e-11	Insoluble	-7.88	7.91e-06	1.33e-08	Poorly soluble	Low	No	Yes	No	No	No	No	Yes	-4.31	1	4	1	1	2	0.55	0	0	3	7.18
Ananixanthone	Oc1ccc(cc1)c1cc(=O)c2c(o1)cc(cc2O)O	C15H10O5	270.24	20	16	0	1	5	3	73.99	90.9	1.89	3.02	2.58	0.52	2.52	2.11	-3.94	0.0307	0.000114	Soluble	-4.59	0.00688	2.55e-05	Moderately soluble	-4.4	0.0107	3.94e-05	Moderately soluble	High	No	No	Yes	No	No	Yes	Yes	-5.8	0	0	0	0	0	0.55	0	0	0	2.96
Annoglaucin	OC[C@H]1O[C@@H](Oc2cc(O)c3c(c2)oc(cc3=O)c2ccc(cc2)O)[C@@H]([C@H]([C@@H]1O)O)O	C21H20O10	432.38	31	16	0.29	4	10	6	106.11	170.05	1.98	1.81	0.05	-1.61	0.35	0.52	-3.78	0.0719	0.000166	Soluble	-5	0.00432	9.99e-06	Moderately soluble	-2.69	0.877	0.00203	Soluble	Low	No	Yes	No	No	No	No	No	-7.65	1	0	1	1	2	0.55	0	0	1	5.12
Annoglaxin	COc1cc(ccc1OC)C[C@H]1COC(=O)[C@@H]1Cc1ccc(c(c1)OC)O	C21H24O6	372.41	27	12	0.38	7	6	1	100.6	74.22	2.64	3.59	2.99	2.12	3.99	3.07	-4.28	0.0197	5.28e-05	Moderately soluble	-4.84	0.00544	1.46e-05	Moderately soluble	-5.75	0.000656	1.76e-06	Moderately soluble	High	Yes	No	No	No	Yes	Yes	Yes	-6.02	0	0	0	0	0	0.55	0	0	2	3.43
Annomuricine E	CCCCCCCCCCCCCCCc1cc(O)cc(c1OC(=C)C)O	C24H40O3	376.57	27	6	0.67	16	3	2	118.38	49.69	5.31	9.88	7.64	4.82	7.55	7.04	-7.51	1.17e-05	3.11e-08	Poorly soluble	-10.85	5.35e-09	1.42e-11	Insoluble	-7.82	5.75e-06	1.53e-08	Poorly soluble	Low	No	No	Yes	No	No	Yes	No	-1.58	1	1	1	1	2	0.55	0	1	3	3.66
Annonacin	CCCCCCC=CCCCCCCCc1cc(O)cc(c1OC(=O)C)O	C23H36O4	376.53	27	6	0.61	15	4	2	113.78	66.76	4.52	7.87	6.43	4.48	6.68	6	-6.31	0.000186	4.93e-07	Poorly soluble	-9.12	2.86e-07	7.59e-10	Poorly soluble	-6.6	9.48e-05	2.52e-07	Poorly soluble	High	No	No	Yes	No	Yes	Yes	No	-3.01	1	1	1	1	1	0.55	0	2	3	3.45
Annonacin A	CCCCCC=CCC=CCCCCCCCc1cc(O)cc(c1OC(=O)C)O	C25H38O4	402.57	29	6	0.56	16	4	2	122.92	66.76	4.75	8.27	6.99	4.82	7.35	6.44	-6.64	9.16e-05	2.27e-07	Poorly soluble	-9.53	1.17e-07	2.92e-10	Poorly soluble	-6.67	8.65e-05	2.15e-07	Poorly soluble	Low	No	No	Yes	No	Yes	No	No	-2.88	1	1	1	1	2	0.55	0	2	3	3.66
Annoreticuin-9-one	C=C1CC[C@]2([C@@H]([C@@H]1C)[C@H]1CC[C@H]3[C@@]([C@@]1(C[C@@H]2O)C)(C)CC[C@@H]1[C@]3(C)CC[C@@H](C1(C)C)O)C	C30H50O2	442.72	32	0	0.93	0	2	2	136.3	40.46	4.39	7.6	7	6	5.91	6.18	-7.37	1.88e-05	4.24e-08	Poorly soluble	-8.29	2.28e-06	5.16e-09	Poorly soluble	-6.14	0.000319	7.21e-07	Poorly soluble	Low	No	No	No	No	No	No	No	-3.6	1	3	0	1	1	0.55	0	1	2	5.65
Anthocyanin 1	OC[C@]1(C)[C@@H](O)[C@H](O)C[C@]2([C@H]1CC[C@@]1([C@@H]2CC=C2[C@@]1(C)CC[C@@]1([C@H]2[C@@H](C)[C@@H](CC1)C)C(=O)O)C)C	C30H48O5	488.7	35	0	0.9	2	5	4	139.24	97.99	3.41	5.7	5.03	4.14	3.96	4.45	-6.33	0.000229	4.69e-07	Poorly soluble	-7.52	1.46e-05	2.99e-08	Poorly soluble	-4.28	0.0259	5.31e-05	Moderately soluble	High	No	Yes	No	No	No	No	No	-5.23	0	3	0	0	1	0.56	0	1	2	6.56
Anthocyanin 2	CCCCCCCCCC[C@@H]([C@H]1CC[C@@H](O1)[C@H]1CC[C@H](O1)[C@@H](CCCCCCCCCC[C@H](CC1=C[C@@H](OC1=O)C)O)O)O	C37H66O7	622.92	44	0	0.92	25	7	3	180.1	105.45	6.94	9.7	7.86	3.81	9.23	7.51	-8.16	4.28e-06	6.87e-09	Poorly soluble	-11.83	9.19e-10	1.47e-12	Insoluble	-7.87	8.35e-06	1.34e-08	Poorly soluble	Low	No	No	No	No	No	No	Yes	-3.21	1	4	1	1	3	0.55	0	0	3	7.65
Apigenin	CCCCCCCCCC[C@@H]([C@@H]1CC[C@@H](O1)[C@H]1CC[C@H](O1)[C@H](CCCC[C@H](CCCCCCCC1=C[C@H](OC1=O)C)O)O)O	C37H66O7	622.92	44	0	0.92	25	7	3	180.1	105.45	7.45	9.33	7.86	3.81	9.23	7.54	-7.93	7.32e-06	1.17e-08	Poorly soluble	-11.45	2.22e-09	3.57e-12	Insoluble	-7.87	8.35e-06	1.34e-08	Poorly soluble	Low	No	No	No	No	No	No	Yes	-3.48	1	4	1	1	3	0.55	0	0	3	7.51
Apigenin-7-O-beta-D-glucopyranoside	CCCCCC[C@@H](CCC[C@H]([C@H]1CC[C@@H](O1)[C@H]1CC[C@H](O1)[C@@H](CCCCCCCCCCCCC1=C[C@@H](OC1=O)C)O)O)O	C37H66O7	622.92	44	0	0.92	25	7	3	180.1	105.45	5.95	9.52	7.86	3.81	9.23	7.27	-8.05	5.56e-06	8.92e-09	Poorly soluble	-11.64	1.41e-09	2.27e-12	Insoluble	-7.87	8.35e-06	1.34e-08	Poorly soluble	Low	No	No	No	No	No	No	Yes	-3.34	1	4	1	1	3	0.55	0	0	3	7.51
Arctigenin	CCCCC[C@@H](CCCC[C@@H]([C@@H]1CC[C@@H](O1)[C@H]1CC[C@H](O1)[C@H](CCCCCCCCCCCCC1=C[C@H](OC1=O)C)O)O)O	C37H66O7	622.92	44	0	0.92	25	7	3	180.1	105.45	6.98	9.33	7.86	3.81	9.23	7.44	-7.93	7.32e-06	1.17e-08	Poorly soluble	-11.45	2.22e-09	3.57e-12	Insoluble	-7.87	8.35e-06	1.34e-08	Poorly soluble	Low	No	No	No	No	No	No	Yes	-3.48	1	4	1	1	3	0.55	0	0	3	7.51
Ardisiphenol A	CCCCCCCCCCCC[C@@H]([C@@H]1CC[C@@H](O1)[C@H](CCCCCC[C@@H](CCCCC[C@H](CC1=C[C@@H](OC1=C)C)O)O)O)O	C38H70O6	622.96	44	0	0.89	28	6	4	186.42	99.38	7.91	10.02	8.83	3.98	10.44	8.24	-8.17	4.24e-06	6.81e-09	Poorly soluble	-12.04	5.73e-10	9.21e-13	Insoluble	-8.67	1.33e-06	2.14e-09	Poorly soluble	Low	No	Yes	No	No	No	No	No	-2.99	1	4	1	1	3	0.55	0	0	3	8.21
Ardisiphenol B	CCCCCCCCCCCC[C@@H]([C@@H]1CC[C@@H](O1)[C@@H](CCCC[C@H](CCCCC[C@@H](CC1=C[C@H](OC1=O)C)O)O)O)O	C35H64O7	596.88	42	0	0.91	26	7	4	172.67	116.45	6.73	8.42	7.06	3.46	8.88	6.91	-7.13	4.43e-05	7.43e-08	Poorly soluble	-10.73	1.1e-08	1.84e-11	Insoluble	-7.4	2.39e-05	4e-08	Poorly soluble	Low	No	No	No	No	No	No	Yes	-3.96	1	4	1	1	2	0.55	0	0	3	7.36
Ardisiphenol C	OC[C@@]1(C)[C@@H](O)CC[C@@H]2C1=C[C@H](O)[C@@H]1[C@@]2(C)CC[C@]2([C@@]1(C)CC[C@@H]2[C@@H](C[C@H]([C@@H](C(=C)C)O)O)C)C	C30H50O5	490.72	35	0	0.87	6	5	5	141.69	101.15	3.89	5.28	4.22	3.33	4.54	4.25	-5.81	0.000755	1.54e-06	Moderately soluble	-7.15	3.44e-05	7.01e-08	Poorly soluble	-3.83	0.0726	0.000148	Soluble	High	No	Yes	No	No	No	No	No	-5.54	0	3	0	0	1	0.55	0	1	2	6.78
Arnidiol	OC[C@@]1(C)[C@@H](O)CC[C@@H]2C1=C[C@H](O)[C@@H]1[C@@]2(C)CC[C@]2([C@@]1(C)CC[C@@H]2[C@@H](C[C@H](C=C(C)C)O)C)C	C30H50O4	474.72	34	0	0.87	5	4	4	140.53	80.92	4.07	6.13	5.25	4.16	5.14	4.95	-6.32	0.00023	4.84e-07	Poorly soluble	-7.61	1.16e-05	2.45e-08	Poorly soluble	-4.41	0.0187	3.94e-05	Moderately soluble	High	No	Yes	No	No	No	No	No	-4.84	1	2	0	0	1	0.55	0	1	2	6.66
Asiatic acid	CO[C@H]1C=C2[C@H]([C@]3([C@@H]1[C@]1(C)CC[C@@H]([C@]1(CC3)C)[C@@H](C[C@H](C=C(C)C)O)C)C)CC[C@@H]([C@]2(C)CO)O	C31H52O4	488.74	35	0	0.87	6	4	3	145.26	69.92	4.66	6.67	5.9	4.35	5.7	5.46	-6.68	0.000103	2.11e-07	Poorly soluble	-7.94	5.6e-06	1.15e-08	Poorly soluble	-5.09	0.00395	8.09e-06	Moderately soluble	High	No	No	No	No	No	No	No	-4.55	1	4	0	1	1	0.55	0	1	2	6.78
Asimicin	CC(=C[C@@H](C[C@H]([C@H]1CC[C@@]2([C@]1(C)CC[C@@]1([C@H]2[C@@H](O)C=C2[C@H]1CC[C@@H](C2(C)C)O)C)C)C)O)C	C30H50O3	458.72	33	0	0.87	4	3	3	139.37	60.69	4.34	6.8	6.28	5.01	5.74	5.63	-6.7	9.07e-05	1.98e-07	Poorly soluble	-7.88	6.02e-06	1.31e-08	Poorly soluble	-4.98	0.00481	1.05e-05	Moderately soluble	High	No	No	No	No	No	No	No	-4.27	1	3	0	1	1	0.55	0	1	2	6.5
Asimin	OC[C@@]1(C)[C@@H](O)CC[C@@H]2C1=CC(=O)[C@@H]1[C@@]2(C)CC[C@]2([C@@]1(C)CC[C@@H]2[C@@H](CC(=O)C=C(C)C)C)C	C30H46O4	470.68	34	0	0.8	5	4	2	138.6	74.6	3.89	6.07	5.67	3.97	6.05	5.13	-6.25	0.000263	5.59e-07	Poorly soluble	-7.42	1.8e-05	3.83e-08	Poorly soluble	-5.58	0.00124	2.64e-06	Moderately soluble	High	No	Yes	No	No	No	No	Yes	-4.86	0	3	0	0	1	0.55	0	1	2	6.32
Asiminacin	OC[C@@]1(C)[C@@H](O)CC[C@@H]2C1=CC(=O)[C@@H]1[C@@]2(C)CC[C@]2([C@@]1(C)CC[C@@H]2[C@@H](CC(=O)C)C)C	C27H42O4	430.62	31	0	0.85	4	4	2	124.66	74.6	3.39	4.63	4.72	3.48	5.14	4.27	-5.16	0.00296	6.87e-06	Moderately soluble	-5.92	0.000515	1.2e-06	Moderately soluble	-5.14	0.00311	7.21e-06	Moderately soluble	High	No	Yes	No	No	No	No	No	-5.64	0	1	0	0	0	0.55	0	0	2	6.03
Asiminecin	CC(=C[C@@H](C[C@H]([C@H]1CC[C@@]2([C@]1(C)CC[C@@]1([C@H]2C(=O)C=C2[C@H]1CC[C@@H](C2(C)C)O)C)C)C)O)C	C30H48O3	456.7	33	0	0.83	4	3	2	138.4	57.53	4.06	6.85	6.48	4.91	6.32	5.73	-6.72	8.64e-05	1.89e-07	Poorly soluble	-7.87	6.2e-06	1.36e-08	Poorly soluble	-5.67	0.000965	2.11e-06	Moderately soluble	High	No	No	No	No	No	No	No	-4.22	1	3	0	1	1	0.55	0	1	2	6.31
Asitrilobins A	OC[C@@H]1O[C@H](O[C@H]2C=C3[C@H]([C@]4([C@@H]2[C@]2(C)CC[C@@H]([C@]2(CC4)C)[C@@H](C/C=C/C(OC)(C)C)C)C)CC[C@@H](C3(C)C)O)[C@H]([C@H]([C@H]1O)O)O	C37H62O8	634.88	45	0	0.89	8	8	5	176.52	128.84	4.74	5.22	4.75	2.62	4.29	4.33	-6.54	0.000184	2.9e-07	Poorly soluble	-7.67	1.35e-05	2.12e-08	Poorly soluble	-3.86	0.0872	0.000137	Soluble	Low	No	Yes	No	No	No	No	No	-6.47	1	3	0	0	2	0.55	0	1	3	8.26
Asitrilobins B	COc1cc(O)c2c(c1)OCC(C2=O)c1ccc(cc1OC)O	C17H16O6	316.31	23	12	0.24	3	6	2	82.53	85.22	2.63	2.86	2.47	0.66	2.61	2.25	-3.79	0.0512	0.000162	Soluble	-4.31	0.0155	4.91e-05	Moderately soluble	-4.23	0.0186	5.89e-05	Moderately soluble	High	No	No	Yes	No	Yes	No	Yes	-6.2	0	0	0	0	0	0.55	0	0	0	3.44
Balsaminapentaol A	OC(=O)c1ccccc1	C7H6O2	122.12	9	6	0	1	2	1	33.4	37.3	1.11	1.87	1.38	1.6	1.24	1.44	-2.2	0.766	0.00627	Soluble	-2.27	0.648	0.00531	Soluble	-1.72	2.31	0.0189	Soluble	High	Yes	No	No	No	No	No	No	-5.72	0	3	0	0	1	0.85	0	0	1	1
Balsaminol A	OC[C@@H]1O[C@H]([C@@H]([C@H]1O)O)O[C@@H]1O[C@H](OC(=O)c2ccccc2)[C@H]([C@@H]([C@H]1O)O)O	C17H22O11	402.35	28	6	0.59	6	11	6	86.98	175.37	0.44	-1.79	-2.94	-2.03	-2.65	-1.79	-0.97	43.2	0.107	Very soluble	-1.38	16.9	0.042	Very soluble	1.39	9970	24.8	Soluble	Low	No	No	No	No	No	No	No	-10.03	2	1	1	1	3	0.17	0	0	1	4.86
Balsaminol B	OC[C@@H]1O[C@H](OC(=O)c2ccccc2)[C@H]([C@@H]([C@H]1O)O)O	C13H16O7	284.26	20	6	0.46	4	7	4	65.37	116.45	1.51	-0.61	-1.36	-0.76	-0.83	-0.41	-1.18	18.9	0.0667	Very soluble	-1.36	12.3	0.0433	Very soluble	-0.16	195	0.687	Soluble	High	No	No	No	No	No	No	No	-8.47	0	1	0	0	0	0.55	0	0	0	4.04
Balsaminol F	COc1c(OC)ccc2c1c[n+]1CCc3c(c1c2)cc1c(c3)OCO1	C20H18NO4+	336.36	25	16	0.25	2	4	0	94.87	40.8	0	3.62	3.1	2.19	3.74	2.53	-4.55	0.00953	2.83e-05	Moderately soluble	-4.16	0.023	6.85e-05	Moderately soluble	-5.92	0.0004	1.19e-06	Moderately soluble	High	Yes	Yes	Yes	No	No	Yes	Yes	-5.78	0	0	0	0	0	0.55	0	1	1	3.14
Balsaminols C	OC[C@H]1O[C@@H]2[C@@H]([C@H]([C@@H]1O)O)OC(=O)c1c2c(O)c(c(c1)O)OC	C14H16O9	328.27	23	6	0.5	2	9	5	72.8	145.91	1.13	-0.97	-1.53	-1.67	-0.97	-0.8	-1.33	15.5	0.0473	Very soluble	-1.61	8.08	0.0246	Very soluble	0.09	407	1.24	Soluble	Low	No	No	No	No	No	No	No	-8.99	0	1	1	1	0	0.55	0	0	0	4.39
Balsaminols D	CC1=CCCC(=C)[C@@H]2[C@@H](CC1)C(C2)(C)C	C15H24	204.35	15	0	0.73	0	0	0	68.78	0	3.29	4.38	4.73	4.63	4.19	4.24	-3.87	0.0278	0.000136	Soluble	-4.1	0.0164	8.01e-05	Moderately soluble	-3.77	0.0349	0.000171	Soluble	Low	No	No	No	Yes	Yes	No	No	-4.44	1	0	0	0	1	0.55	0	1	2	4.51
Balsaminols E	COc1cc2Oc3cc(O)c(cc3/C(=C/CC=C(C)C)/c2c(c1CCC=C(C)C)O)OC	C27H32O5	436.54	32	12	0.33	7	5	2	130.21	68.15	4.91	6.8	6.91	3.76	6.67	5.81	-6.65	9.86e-05	2.26e-07	Poorly soluble	-8.04	3.99e-06	9.15e-09	Poorly soluble	-6.89	5.57e-05	1.28e-07	Poorly soluble	Low	No	No	No	No	No	No	No	-4.13	0	2	0	1	1	0.55	0	1	2	4.27
Balsaminoside A	CC[C@@H](C(C)C)CC[C@H]([C@H]1CC[C@@H]2[C@]1(C)CC[C@H]1[C@H]2CC=C2[C@]1(C)CC[C@@H](C2)O)C	C29H50O	414.71	30	0	0.93	6	1	1	133.23	20.23	5.05	9.34	8.02	6.73	7.04	7.24	-7.9	5.23e-06	1.26e-08	Poorly soluble	-9.67	8.9e-08	2.15e-10	Poorly soluble	-6.19	0.000269	6.49e-07	Poorly soluble	Low	No	No	No	No	No	No	No	-2.2	1	3	0	1	2	0.55	0	1	2	6.3
Cajanol	OC[C@H]1O[C@@H](O[C@H]2[C@@H](Oc3c(C2=O)c(O)cc(c3)O)c2ccc(c(c2)O)O)[C@@H]([C@H]([C@@H]1O)O)O	C21H22O12	466.39	33	12	0.38	4	12	8	107.14	206.6	1.35	-0.64	-1.31	-2.67	-1.47	-0.95	-2.33	2.16	0.00464	Soluble	-3.23	0.277	0.000595	Soluble	-0.29	238	0.509	Soluble	Low	No	No	No	No	No	No	No	-9.6	2	1	1	1	3	0.17	1	1	1	5.3
Benzoic acid	CC[C@@H](C(C)C)CC[C@H]([C@H]1CC[C@@H]2[C@]1(C)CC[C@H]1[C@H]2CC=C2[C@]1(C)CC[C@@H](C2)O[C@@H]1O[C@H](CO)[C@H]([C@@H]([C@H]1O)O)O)C	C35H60O6	576.85	41	0	0.94	9	6	4	165.61	99.38	5.17	7.74	5.85	3.96	5.02	5.55	-7.7	1.15e-05	2e-08	Poorly soluble	-9.67	1.23e-07	2.14e-10	Poorly soluble	-4.4	0.0228	3.94e-05	Moderately soluble	Low	No	No	No	No	No	No	No	-4.32	1	4	0	0	1	0.55	0	1	3	8.02
Benzoic acid alpha-L-arabinopyranosyl(1->6)-beta-D-glucopyranoside	OC[C@@]12CC[C@H]([C@@H]2[C@@H]2[C@](CC1)(C)[C@]1(C)CC[C@@H]3[C@]([C@H]1CC2)(C)CC[C@@H](C3(C)C)O)C(=C)C	C30H50O2	442.72	32	0	0.93	2	2	2	136.3	40.46	4.47	8.28	7	6	6.21	6.39	-7.67	9.48e-06	2.14e-08	Poorly soluble	-8.99	4.5e-07	1.02e-09	Poorly soluble	-6.17	0.000299	6.75e-07	Poorly soluble	Low	No	No	No	No	No	No	No	-3.12	1	3	0	1	1	0.55	0	1	2	5.68
Benzoic acid beta-D-glucopyranoside	CC(=C)[C@@H]1CC[C@]2([C@H]1[C@H]1CC[C@H]3[C@@]([C@]1(C)CC2)(C)CC[C@@H]1[C@]3(C)CC[C@@H](C1(C)C)O)C(=O)O	C30H48O3	456.7	33	0	0.9	2	3	2	136.91	57.53	3.83	8.21	7.09	5.82	5.75	6.14	-7.71	8.87e-06	1.94e-08	Poorly soluble	-9.28	2.4e-07	5.26e-10	Poorly soluble	-5.7	0.000909	1.99e-06	Moderately soluble	Low	No	No	No	No	Yes	No	No	-3.26	1	3	0	1	1	0.85	0	1	2	5.63
Berberine	CC(=O)O[C@H]1[C@H]2[C@@H](OC(=O)C2=C)C[C@H]([C@H]2[C@@]1(C)C(=O)C=C2)C	C17H20O5	304.34	22	0	0.59	2	5	0	79.05	69.67	2.47	1.19	1.82	1.92	2.08	1.89	-2.34	1.38	0.00452	Soluble	-2.25	1.71	0.00563	Soluble	-2.32	1.46	0.00481	Soluble	High	Yes	No	No	No	No	No	No	-7.31	0	0	0	0	0	0.55	0	2	0	4.79
Bergenin	O=C(C(C)C)CC[C@H]([C@@H]1CCC(=CC1)C)C	C15H26O	222.37	16	0	0.8	5	1	0	71.83	17.07	3.25	3.94	4.37	3.56	4.21	3.87	-3.37	0.0947	0.000426	Soluble	-4	0.0223	0.0001	Soluble	-3.48	0.0738	0.000332	Soluble	High	Yes	No	No	No	Yes	No	No	-4.86	0	0	0	0	1	0.55	0	1	2	3.83
Beta-Caryophyllene	C=C/C(=C/C[C@]1(C)[C@@H](C)C[C@H]([C@@]23[C@@H]1C[C@@H](OC(=O)C(C)C)C=C3[C@@H](O[C@H]2OC(=O)C)OC(=O)C)O)/C	C28H40O8	504.61	36	0	0.68	10	8	1	134.53	108.36	4.37	4.68	4.22	3.03	3.92	4.05	-5.26	0.00279	5.53e-06	Moderately soluble	-6.68	0.000105	2.07e-07	Poorly soluble	-3.3	0.252	0.000499	Soluble	High	No	No	No	No	No	No	Yes	-6.06	1	3	0	0	0	0.55	0	3	3	6.99
Beta-Mangostin	C=C/C(=C/C[C@@]1(C)[C@@H](C)C[C@H]([C@@]23[C@@H]1C[C@H](OC(=O)[C@H](CC)C)C=C3[C@@H](O[C@@H]2OC(=O)C)OC(=O)C)O)/C	C29H42O8	518.64	37	0	0.69	11	8	1	139.33	108.36	3.73	5.04	4.62	3.22	4.34	4.19	-5.5	0.00162	3.13e-06	Moderately soluble	-7.06	4.55e-05	8.77e-08	Poorly soluble	-3.69	0.106	0.000204	Soluble	High	No	Yes	No	No	No	No	Yes	-5.89	1	3	1	0	1	0.55	0	3	3	7.16
Beta-sitosterol	C=C/C(=C/C[C@@]1(C)[C@@H](C)CC[C@@]23[C@@H]1C[C@H](OC(=O)C(C)C)C=C3[C@@H](O[C@@H]2OC(=O)C)OC(=O)C)/C	C28H40O7	488.61	35	0	0.68	10	7	0	133.37	88.13	4.12	5.84	5.25	3.82	4.79	4.76	-5.89	0.000631	1.29e-06	Moderately soluble	-7.46	1.69e-05	3.45e-08	Poorly soluble	-4.13	0.0366	7.48e-05	Moderately soluble	High	No	No	No	No	Yes	No	Yes	-5.13	0	3	0	0	1	0.55	0	3	3	6.82
Beta-sitosterol-3-O-beta-D-glucoside	C=C/C(=C/C[C@@]1(C)[C@@H](C)CC[C@]2([C@@H]1CC(=O)C=C2COC(=O)C)COC(=O)C)/C	C24H34O5	402.52	29	0	0.62	9	5	0	114.08	69.67	3.84	4.22	4.57	3.4	5.28	4.26	-4.4	0.016	3.98e-05	Moderately soluble	-5.39	0.00163	4.04e-06	Moderately soluble	-4.8	0.00642	1.6e-05	Moderately soluble	High	Yes	No	No	No	Yes	Yes	Yes	-5.76	0	0	0	0	0	0.55	0	2	3	5.39
Beta-sitosterol-3-O-glucoside	CC[C@@H]([C@@H](CCCCCC[C@@H]([C@H]1CC[C@@H](O1)[C@H]1CC[C@@H](O1)[C@@H](CCCCCCCCCCCCC1=C[C@@H](OC1=O)C)O)O)O)O	C37H66O8	638.92	45	0	0.92	25	8	4	181.26	125.68	6.78	8.36	6.83	3.02	8.47	6.69	-7.42	2.44e-05	3.82e-08	Poorly soluble	-10.87	8.71e-09	1.36e-11	Insoluble	-6.92	7.68e-05	1.2e-07	Poorly soluble	Low	No	No	No	No	No	No	Yes	-4.26	1	4	1	1	3	0.55	0	0	3	7.63
Betulin	O[C@@H]1CC[C@]2([C@H](C1(C)C)CC[C@@]1([C@@H]2CC[C@H]2[C@@]1(C)CC[C@@H]2[C@]1(C)CC[C@H](O1)C(O)(C)C)C)C	C30H52O3	460.73	33	0	1	2	3	2	138.2	49.69	4.69	7.25	6.74	5.26	5.88	5.96	-7.13	3.4e-05	7.38e-08	Poorly soluble	-8.12	3.51e-06	7.62e-09	Poorly soluble	-5.87	0.000629	1.36e-06	Moderately soluble	High	No	No	No	No	No	No	No	-3.96	1	3	0	1	1	0.55	0	0	2	6.2
Betulinic acid	O=C1CC[C@@](O1)(C)[C@H]1CC[C@@]2([C@@H]1CC[C@H]1[C@@]2(C)CC[C@@H]2[C@]1(C)CC[C@H](C2(C)C)O)C	C27H44O3	416.64	30	0	0.96	1	3	1	122.78	46.53	3.99	6.86	6.13	5.34	5.59	5.58	-6.68	8.73e-05	2.09e-07	Poorly soluble	-7.65	9.39e-06	2.25e-08	Poorly soluble	-5.78	0.000693	1.66e-06	Moderately soluble	High	No	No	No	No	Yes	No	No	-3.97	1	2	0	1	1	0.55	0	0	2	5.24
Bigelovin	O=C1CC[C@@](O1)(C)[C@H]1CC[C@@]2([C@@H]1CC[C@H]1[C@@]2(C)CC[C@@H]2[C@]1(C)CCC(=O)C2(C)C)C	C27H42O3	414.62	30	0	0.93	1	3	0	121.82	43.37	3.86	6.55	6.34	5.24	6.18	5.63	-6.47	0.00014	3.38e-07	Poorly soluble	-7.26	2.28e-05	5.51e-08	Poorly soluble	-6.48	0.000139	3.34e-07	Poorly soluble	High	No	No	No	No	Yes	No	No	-4.18	1	2	0	1	1	0.55	0	0	2	5.1
Bisabolone	OC(=O)/C=C/c1ccc(c(c1)O)O	C9H8O4	180.16	13	6	0	2	4	3	47.16	77.76	0.97	1.15	1.09	0.7	0.75	0.93	-1.89	2.32	0.0129	Very soluble	-2.38	0.755	0.00419	Soluble	-0.71	35.1	0.195	Soluble	High	No	No	No	No	No	No	No	-6.58	0	0	0	0	1	0.56	1	2	1	1.81
Bucidarasin A	C=C1[C@@H]2CC[C@H](C1(C)C)C2	C10H16	136.23	10	0	0.8	0	0	0	45.22	0	2.57	4.22	3	4.29	3.08	3.43	-3.34	0.0618	0.000454	Soluble	-3.93	0.016	0.000117	Soluble	-2.48	0.455	0.00334	Soluble	Low	Yes	No	No	No	Yes	No	No	-4.13	1	1	0	0	2	0.55	0	1	2	3.5
Bucidarasin B	COC(=O)CC[C@]1(C)[C@@H](CC[C@]23[C@@H]1CC[C@H](C2)C(=C)C3=O)C(=C)C	C21H30O3	330.46	24	0	0.71	5	3	0	96.74	43.37	3.43	4.75	4.47	3.79	4.98	4.28	-4.55	0.00928	2.81e-05	Moderately soluble	-5.39	0.00134	4.06e-06	Moderately soluble	-4.85	0.00469	1.42e-05	Moderately soluble	High	Yes	No	No	Yes	Yes	Yes	Yes	-4.94	0	0	0	0	0	0.55	0	2	1	5.05
Bucidarasin C	OC(=O)CC[C@]1(C)[C@@H](CC[C@]23[C@@H]1CC[C@H](C2)C(=C)C3=O)C(=C)C	C20H28O3	316.43	23	0	0.7	4	3	1	92.42	54.37	2.67	4.43	4.39	3.57	4.43	3.9	-4.33	0.0148	4.69e-05	Moderately soluble	-5.29	0.00162	5.13e-06	Moderately soluble	-4.15	0.0222	7.03e-05	Moderately soluble	High	Yes	No	No	Yes	Yes	No	No	-5.08	0	0	0	0	0	0.85	0	2	1	4.95
Bucidarasin D	CC(c1ccc(c(c1)O)C)C	C10H14O	150.22	11	6	0.4	1	1	1	48.01	20.23	2.24	3.49	2.82	2.76	2.79	2.82	-3.31	0.074	0.000492	Soluble	-3.6	0.0379	0.000253	Soluble	-3.01	0.146	0.000971	Soluble	High	Yes	No	Yes	No	No	No	No	-4.74	0	1	0	0	2	0.55	0	0	1	1
Bullatetrocin	OC[C@]1(C)[C@@H](O)CC[C@]2([C@H]1CC[C@@]1([C@@H]2CC=C2[C@@]1(C)C[C@@H](O)[C@@]1([C@H]2CC(CC1)(C)C)C(=O)O)C)C	C30H48O5	488.7	35	0	0.9	2	5	4	138.98	97.99	3.22	6.21	5.18	4.14	4.35	4.62	-6.65	0.000109	2.24e-07	Poorly soluble	-8.05	4.32e-06	8.85e-09	Poorly soluble	-4.72	0.00921	1.88e-05	Moderately soluble	High	No	Yes	No	No	No	No	No	-4.87	0	3	0	0	1	0.56	0	1	2	6.39
Cabraleadiol	O=C1C=C2C(=CC=C3[C@@]2(C)CC[C@@]2([C@]3(C)CC[C@@]3([C@H]2C[C@@](C)(CC3)C(=O)O)C)C)C(=C1O)C	C29H38O4	450.61	33	0	0.66	1	4	2	131.29	74.6	3.17	5.94	6.7	4.42	5.39	5.12	-6.31	0.000221	4.9e-07	Poorly soluble	-7.28	2.36e-05	5.23e-08	Poorly soluble	-5.8	0.000706	1.57e-06	Moderately soluble	Low	No	Yes	No	No	Yes	No	Yes	-4.83	1	3	0	1	1	0.85	0	0	2	6.28
Cabraleahydroxylactone	Oc1ccc(cc1)[C@@H]1Oc2cc(O)cc(c2C(=O)[C@H]1[C@H]1[C@@H](Oc2c(C1=O)c(O)cc(c2)O)c1ccc(cc1)O)O	C30H22O10	542.49	40	24	0.13	3	10	6	141.03	173.98	2.45	4.62	3.84	0.58	2.85	2.87	-6.36	0.000237	4.36e-07	Poorly soluble	-8	5.44e-06	1e-08	Poorly soluble	-6.27	0.000293	5.41e-07	Poorly soluble	Low	No	No	No	No	Yes	No	Yes	-6.33	2	2	1	1	2	0.17	0	0	2	4.86
Cabralealactone	CCCCCCCCCCCC[C@H]([C@H]1CC[C@@H](O1)[C@@H](CCCCC[C@@H](CCCCCCC1=C[C@@H](OC1=O)C)O)O)O	C35H64O6	580.88	41	0	0.91	26	6	3	171.51	96.22	7.28	9.94	8.09	4.26	9.63	7.84	-7.99	5.98e-06	1.03e-08	Poorly soluble	-11.89	7.54e-10	1.3e-12	Insoluble	-8.35	2.59e-06	4.47e-09	Poorly soluble	Low	No	Yes	No	No	No	No	No	-2.79	2	4	1	1	2	0.17	0	0	3	7.09
Caffeic acid	COc1ccccc1/C=C/C[C@]1(O)CCC(=O)C=C1	C16H18O3	258.31	19	6	0.31	4	3	1	75.49	46.53	2.63	2.18	2.64	1.91	3.31	2.53	-2.78	0.424	0.00164	Soluble	-2.79	0.418	0.00162	Soluble	-3.52	0.0771	0.000299	Soluble	High	Yes	No	No	Yes	No	No	No	-6.33	0	0	0	0	0	0.55	0	0	0	3.34
Camphene	CO[C@H]1CC(=O)CC[C@@]1(O)C/C=C/c1ccccc1	C16H20O3	260.33	19	6	0.44	4	3	1	75.36	46.53	2.62	1.76	2.48	1.73	3.3	2.38	-2.53	0.764	0.00293	Soluble	-2.35	1.15	0.00442	Soluble	-3.76	0.045	0.000173	Soluble	High	Yes	No	No	No	No	No	No	-6.64	0	0	0	0	0	0.55	0	0	0	3.54
Caracasine	OCC(=CCNc1ncnc2c1[nH]cn2)C	C10H13N5O	219.24	16	9	0.3	4	4	3	60.91	86.72	1.04	0.67	0.51	-0.03	1.02	0.64	-1.77	3.69	0.0168	Very soluble	-2.07	1.88	0.00856	Soluble	-2.94	0.253	0.00116	Soluble	High	No	No	No	No	No	No	No	-7.16	0	0	0	0	0	0.55	0	1	1	2.54
Caracasine acid	C[C@@H]1CC[C@]2([C@@H]([C@H]1C)C1=CC[C@H]3[C@@]([C@@]1(CC2)C)(C)CC[C@@H]1[C@]3(C)C[C@@H](O)[C@@H](C1(C)C)O)C(=O)O	C30H48O4	472.7	34	0	0.9	1	4	3	138.08	77.76	3.35	6.37	6.06	4.97	4.56	5.06	-6.72	9.05e-05	1.91e-07	Poorly soluble	-7.79	7.59e-06	1.61e-08	Poorly soluble	-4.85	0.00668	1.41e-05	Moderately soluble	High	No	Yes	No	No	No	No	No	-4.66	1	3	0	1	1	0.56	0	1	2	6.34
Carvacrol	C[C@@H]([C@H]1CC[C@@]2([C@]1(C)[C@H](O)C[C@@]1([C@H]2[C@@H](O)C=C2[C@H]1CC[C@@H](C2(C)C)O)C)C)C/C=C/C(O)(C)C	C30H50O4	474.72	34	0	0.87	4	4	4	140.57	80.92	4.33	4.93	5.25	4.16	4.85	4.7	-5.63	0.00113	2.37e-06	Moderately soluble	-6.37	0.000204	4.3e-07	Poorly soluble	-4.16	0.0331	6.97e-05	Moderately soluble	High	No	Yes	No	No	No	No	No	-5.7	1	2	0	0	0	0.55	0	1	2	6.61
Caulophyllogenin	C[C@@H]([C@H]1CC[C@@]2([C@]1(C)CC[C@@]1([C@H]2[C@@H](O)C=C2[C@H]1CC[C@@H](C2(C)C)O)C)C)C/C=C/C(O)(C)C	C30H50O3	458.72	33	0	0.87	4	3	3	139.4	60.69	4.51	6.27	6.28	5.01	5.74	5.56	-6.37	0.000196	4.26e-07	Poorly soluble	-7.33	2.14e-05	4.66e-08	Poorly soluble	-4.98	0.00481	1.05e-05	Moderately soluble	High	No	No	No	No	No	No	No	-4.65	1	3	0	1	1	0.55	0	1	2	6.44
Cauloside D	OC[C@]12C(=O)C[C@]3([C@@]([C@@H]2CC=C2[C@H]1C[C@H](O)C(=O)C2(C)C)(C)C[C@H]([C@@H]3[C@](C(=O)/C=C/C(OC(=O)C)(C)C)(O)C)O)C	C32H46O9	574.7	41	0	0.75	7	9	4	152.1	158.43	3.03	1.97	2.47	0.99	3.91	2.47	-4.18	0.0378	6.57e-05	Moderately soluble	-4.92	0.00687	1.2e-05	Moderately soluble	-3.69	0.119	0.000207	Soluble	Low	No	No	No	No	No	No	Yes	-8.41	1	3	1	1	1	0.55	0	2	1	6.88
Celastrol	CC(=O)OC(/C=C/C(=O)[C@@]([C@H]1[C@H](O)C[C@@]2([C@]1(C)CC(=O)[C@@]1([C@H]2CC=C2[C@H]1C[C@H](O)C(=O)C2(C)C)C)C)(O)C)(C)C	C32H46O8	558.7	40	0	0.75	6	8	3	150.94	138.2	3.77	2.64	3.5	1.76	4.5	3.23	-4.57	0.015	2.68e-05	Moderately soluble	-5.19	0.00358	6.41e-06	Moderately soluble	-4.26	0.0305	5.46e-05	Moderately soluble	Low	No	Yes	No	No	No	No	Yes	-7.83	1	3	0	1	0	0.55	0	2	1	6.79
Chamaejasmine	O[C@H]1C[C@@H]2C(=CC[C@@H]3[C@@]2(C)C(=O)C[C@]2([C@@]3(C)C[C@H]([C@@H]2[C@](C(=O)/C=C/C(O)(C)C)(O)C)O)C)C(C1=O)(C)C	C30H44O7	516.67	37	0	0.77	4	7	4	141.2	132.13	2.74	2.06	2.93	1.44	3.95	2.62	-4.08	0.0433	8.37e-05	Moderately soluble	-4.46	0.0178	3.44e-05	Moderately soluble	-3.66	0.113	0.000218	Soluble	High	No	Yes	No	No	No	No	Yes	-7.99	1	3	0	1	0	0.55	0	2	1	6.65
Cis-4-deoxyannoreticuin	OC1=C[C@@H]2C(=CC[C@@H]3[C@@]2(C)C(=O)C[C@]2([C@@]3(C)C[C@H]([C@@H]2[C@](C(=O)/C=C/C(O)(C)C)(O)C)O)C)C(C1=O)(C)C	C30H42O7	514.65	37	0	0.7	4	7	4	141.14	132.13	3.46	2.68	3.62	1.36	3.94	3.01	-4.46	0.018	3.51e-05	Moderately soluble	-5.11	0.00402	7.82e-06	Moderately soluble	-3.65	0.116	0.000226	Soluble	Low	No	Yes	No	No	No	No	Yes	-7.54	1	3	0	1	0	0.55	0	2	1	6.61
candenatenin C	CC(=O)OC(/C=C/C(=O)[C@@]([C@H]1[C@H](O)C[C@@]2([C@]1(C)CC(=O)[C@@]1([C@H]2CC=C2[C@H]1C[C@@H](O)[C@H](C2(C)C)O)C)C)(O)C)(C)C	C32H48O8	560.72	40	0	0.78	6	8	4	151.9	141.36	4.02	2.51	3.29	1.85	3.91	3.12	-4.5	0.0177	3.15e-05	Moderately soluble	-5.12	0.00421	7.51e-06	Moderately soluble	-3.57	0.152	0.000272	Soluble	Low	No	No	No	No	No	No	Yes	-7.94	1	3	1	1	0	0.55	0	2	1	6.83
candenatenin D	COc1c(CC=C(C)C)c2oc3c(O)cccc3c(=O)c2c(c1CC=C(C)C)O	C24H26O5	394.46	29	14	0.29	5	5	2	117.97	79.9	4.34	6.63	5.38	2.73	5.99	5.02	-6.49	0.000128	3.24e-07	Poorly soluble	-8.11	3.07e-06	7.78e-09	Poorly soluble	-6.73	7.35e-05	1.86e-07	Poorly soluble	High	No	No	No	Yes	Yes	No	No	-4	0	0	0	0	1	0.55	0	2	2	3.91
Cis-Zeatin	CC(=O)O[C@H]1C[C@H]2C(C)(C)[C@@H](O)CC[C@@]2([C@@H]2[C@@]1(C)[C@@]13CC[C@@H]([C@]3(C1)CC2)[C@@H](C[C@H]([C@H](C(O)(C)C)O)O)C)C	C32H54O6	534.77	38	0	0.97	7	6	4	150.04	107.22	3.98	5.56	4.85	3.81	5.03	4.65	-6.2	0.00034	6.36e-07	Poorly soluble	-7.57	1.43e-05	2.68e-08	Poorly soluble	-4.53	0.016	2.99e-05	Moderately soluble	High	No	Yes	No	No	No	No	No	-5.61	1	3	0	0	1	0.55	0	0	2	6.99
Corosolic acid	CC(=O)O[C@H]1CC[C@]2([C@H](C1(C)C)C[C@H]([C@]1([C@@H]2CC[C@@]23[C@]1(CC[C@@H]3[C@@H](C[C@H]([C@H](C(O)(C)C)O)O)C)C2)C)O)C	C32H54O6	534.77	38	0	0.97	7	6	4	150.04	107.22	4.19	5.56	4.85	3.81	5.03	4.69	-6.2	0.00034	6.36e-07	Poorly soluble	-7.57	1.43e-05	2.68e-08	Poorly soluble	-4.53	0.016	2.99e-05	Moderately soluble	High	No	Yes	No	No	No	No	No	-5.61	1	3	0	0	1	0.55	0	0	2	6.99
Cucurbalsaminol A	CC(=O)O[C@H]1C[C@@H]2[C@]([C@@H]3[C@@]1(C)C1=CC[C@H]([C@]1(CC3)C)[C@@H](C[C@H]([C@H](C(O)(C)C)O)O)C)(C)CC[C@@H](C2(C)C)O	C32H54O6	534.77	38	0	0.91	7	6	4	151.94	107.22	3.57	5.14	5.01	3.71	4.92	4.47	-5.93	0.000626	1.17e-06	Moderately soluble	-7.14	3.9e-05	7.3e-08	Poorly soluble	-4.4	0.0212	3.96e-05	Moderately soluble	High	No	Yes	No	No	No	No	Yes	-5.91	1	3	0	0	1	0.55	0	1	2	6.92
Cucurbita-5,23(E)-diene-3-beta,7-beta,25-triol	CC(=O)O[C@H]1C[C@@H]2[C@](C3=CC[C@@]4([C@@]([C@H]13)(C)CC[C@H]4[C@@H](C[C@H]([C@H](C(O)(C)C)O)O)C)C)(C)CC[C@@H](C2(C)C)O	C32H54O6	534.77	38	0	0.91	7	6	4	151.94	107.22	4.09	4.99	5.01	3.71	4.92	4.54	-5.84	0.000778	1.45e-06	Moderately soluble	-6.98	5.59e-05	1.04e-07	Poorly soluble	-4.4	0.0212	3.96e-05	Moderately soluble	High	No	Yes	No	No	No	No	Yes	-6.02	1	3	0	0	0	0.55	0	1	2	6.86
Cucurbitacin A	O=C[C@H](CCC(=O)O)NO[C@H]1C[C@@H]2[C@]([C@@H]3[C@@]1(C)[C@@]14CC[C@@H]([C@]4(C1)CC3)[C@H](C[C@@H]([C@H](C(OC)(C)C)O)O)C)(C)CC[C@@H](C2(C)C)O	C36H61NO8	635.87	45	0	0.94	13	9	5	173.76	145.55	4.35	2.96	4.89	2.88	5.05	4.03	-4.79	0.0103	1.62e-05	Moderately soluble	-5.68	0.00133	2.09e-06	Moderately soluble	-4.99	0.00648	1.02e-05	Moderately soluble	Low	No	Yes	No	No	No	No	Yes	-8.08	1	3	2	1	1	0.56	0	2	2	8.41
Cucurbitacin B	COc1ccc(cc1)[C@@]12Oc3cc(OC)cc(c3[C@@]3([C@@]2(O)N(C(=O)[C@@H]3[C@H]1c1ccccc1)CCCCNC(=O)c1ccccc1)O)OC	C38H38N2O8	650.72	48	24	0.32	12	8	3	180.12	126.79	4.45	3.65	3.74	2.19	5.17	3.84	-5.75	0.00115	1.77e-06	Moderately soluble	-6	0.000649	9.97e-07	Poorly soluble	-10.55	1.83e-08	2.81e-11	Insoluble	High	No	Yes	No	Yes	Yes	Yes	Yes	-7.68	1	3	1	0	1	0.55	0	0	3	6.07
Cucurbitacin D	COc1cc(/C=C/2\C(=O)OC[C@@H]2Cc2ccc3c(c2)OCO3)cc(c1OC)OC	C22H22O7	398.41	29	12	0.32	6	7	0	104.96	72.45	3.16	3.72	3.13	2.14	4.44	3.32	-4.56	0.0109	2.73e-05	Moderately soluble	-4.93	0.00465	1.17e-05	Moderately soluble	-5.92	0.000483	1.21e-06	Moderately soluble	High	Yes	No	No	Yes	Yes	Yes	Yes	-6.09	0	0	0	0	0	0.55	0	1	2	3.98
Cucurbitacin I	COC1=C(C)C(=O)C(C(=O)/C/1=C/1\C=Cc2c(O1)cccc2)(C)C	C19H18O4	310.34	23	6	0.26	1	4	0	87.14	52.6	3.13	3.49	3.34	1.62	3.94	3.1	-4.09	0.0252	8.13e-05	Moderately soluble	-4.28	0.0164	5.28e-05	Moderately soluble	-5.15	0.00221	7.13e-06	Moderately soluble	High	Yes	No	Yes	Yes	Yes	No	Yes	-5.72	0	0	0	0	0	0.85	0	2	0	3.78
Cucurbitacin Q	CC(C(=C)CC[C@H]([C@H]1CC[C@@]2([C@]1(C)CC=C1C2=CC[C@@H]2[C@]1(C)CC[C@@H](C2(C)C)O)C)C(=O)O)C	C31H48O3	468.71	34	0	0.77	6	3	2	143.15	57.53	4.48	7.7	7.57	5.82	6.75	6.46	-7.2	2.95e-05	6.29e-08	Poorly soluble	-8.75	8.34e-07	1.78e-09	Poorly soluble	-6.08	0.000392	8.36e-07	Poorly soluble	Low	No	No	No	No	Yes	No	No	-3.69	1	3	0	1	1	0.85	0	1	2	6.31
Cudraxanthone G	CC(C(=C)CC[C@H]([C@H]1C[C@@H]([C@@]2([C@]1(C)CC=C1C2=CC[C@H]2[C@H]1CC[C@@H](C2(C)C)O)C)O)C(=O)O)C	C30H46O4	470.68	34	0	0.77	6	4	3	139.76	77.76	4.28	5.81	6.15	4.78	5.34	5.27	-6.02	0.000447	9.49e-07	Poorly soluble	-7.21	2.88e-05	6.12e-08	Poorly soluble	-4.66	0.0102	2.17e-05	Moderately soluble	High	No	Yes	No	No	Yes	No	Yes	-5.05	1	3	0	1	1	0.56	0	1	2	6.45
Cumingianol A	CC(=CCc1c(O)ccc2c1c(=O)c1c(o2)cc2c(c1O)C=CC(O2)(C)C)C	C23H22O5	378.42	28	14	0.26	2	5	2	111.88	79.9	3.92	5.65	4.94	2.52	5.1	4.43	-5.98	0.000393	1.04e-06	Moderately soluble	-7.09	3.06e-05	8.09e-08	Poorly soluble	-6.21	0.000233	6.15e-07	Poorly soluble	High	No	No	No	Yes	Yes	No	No	-4.6	0	0	0	0	1	0.55	0	2	2	4.08
Cumingianol B	CC(=O)c1cc2C=CC(Oc2cc1O)(C)C	C13H14O3	218.25	16	6	0.31	1	3	1	62.78	46.53	2.63	2.73	2.67	1.5	2.68	2.44	-3.12	0.164	0.000751	Soluble	-3.36	0.095	0.000435	Soluble	-3.03	0.203	0.000931	Soluble	High	Yes	No	Yes	Yes	No	No	No	-5.69	0	0	0	0	0	0.55	0	0	1	3
Cumingianol D	CCCCCCCCCC[C@@H]([C@H]1CC[C@@H](O1)[C@H]1CC[C@@H](O1)[C@@H](CCCCCCCCCCCCC1=C[C@@H](OC1=O)C)O)O	C37H66O6	606.92	43	0	0.92	25	6	2	178.94	85.22	7.63	11.23	8.89	4.61	10	8.47	-9.03	5.69e-07	9.38e-10	Poorly soluble	-12.99	6.15e-11	1.01e-13	Insoluble	-8.83	9.06e-07	1.49e-09	Poorly soluble	Low	No	Yes	No	No	No	No	Yes	-2.03	2	4	1	1	3	0.17	0	0	3	7.39
Cumingianol F	CC(=O)O[C@H]1C[C@@H]2[C@]([C@H]1[C@]([C@@H]1OC(=O)[C@@H]([C@](C1)(C)O)C)(O)C)(C)CC[C@H]1[C@H]2C[C@H]2O[C@]32[C@]1(C)C(=O)C=C[C@@H]3OC(=O)C	C32H44O10	588.69	42	0	0.81	6	10	2	149.84	148.96	3.5	2.45	2.66	1.92	3.05	2.72	-4.64	0.0136	2.3e-05	Moderately soluble	-5.22	0.00353	6e-06	Moderately soluble	-3.35	0.265	0.00045	Soluble	Low	No	Yes	No	No	No	No	No	-8.15	1	3	1	1	0	0.55	0	2	1	7.54
Cumingianoside R	CC(=O)OCC1=C(C)C[C@@H](OC1=O)[C@H]([C@H]1CC[C@@H]2[C@]1(C)CC[C@@H]1[C@H]2C[C@@H]2[C@]3([C@]1(C)C(=O)C=C[C@@H]3O)O2)C	C30H40O7	512.63	37	0	0.77	5	7	1	137.23	102.43	4.02	3.85	3.92	3.07	4.44	3.86	-5.11	0.00394	7.69e-06	Moderately soluble	-5.7	0.00103	2.01e-06	Moderately soluble	-4.4	0.0204	3.98e-05	Moderately soluble	High	No	Yes	No	No	No	No	No	-6.69	1	3	0	0	0	0.55	0	2	2	7.03
Cussonoside B	COc1c(=O)[nH]c2c(c1C)C(=O)c1c(C2=O)cccc1	C15H11NO4	269.25	20	12	0.13	1	4	1	71.83	76.23	1.89	1.18	1.47	0.56	3.63	1.75	-2.63	0.63	0.00234	Soluble	-2.38	1.13	0.0042	Soluble	-5.29	0.00137	5.08e-06	Moderately soluble	High	No	No	Yes	No	No	No	Yes	-7.1	0	0	0	0	0	0.55	1	0	0	2.68
Cyclofoveoglin	O[C@H]1CC[C@]2([C@@H](C1)CC[C@@H]1[C@@H]2CC[C@]2([C@]1(O)CC[C@@H]2C1=CC(=O)OC1)C)C	C23H34O4	374.51	27	0	0.87	1	4	2	104.76	66.76	3.09	2.64	3.6	3.56	3.45	3.27	-3.76	0.0652	0.000174	Soluble	-3.69	0.076	0.000203	Soluble	-3.46	0.128	0.000343	Soluble	High	Yes	Yes	No	No	No	No	No	-6.71	0	0	0	0	0	0.55	0	0	1	5.4
isochaihulactone	O=C1OCC(=C1)[C@H]1CC[C@]2([C@]1(C)CC[C@H]1[C@H]2CC[C@H]2[C@]1(C)CC[C@@H](C2)O[C@H]1C[C@H](O)[C@@H]([C@H](O1)C)O[C@H]1C[C@H](O)[C@@H]([C@H](O1)C)O[C@H]1C[C@H](O)[C@@H]([C@H](O1)C)O)O	C41H64O13	764.94	54	0	0.93	7	13	5	194.94	182.83	5.31	1.85	3.25	1.12	1.54	2.61	-5.29	0.00396	5.17e-06	Moderately soluble	-5.31	0.00374	4.89e-06	Moderately soluble	-2.26	4.23	0.00553	Soluble	Low	No	Yes	No	No	No	No	No	-9.65	2	3	1	1	4	0.17	0	1	1	8.74
Dalrubone	O[C@H]1CC[C@]2([C@@H](C1)CC[C@@H]1[C@@H]2C[C@@H](O)[C@]2([C@]1(O)CC[C@@H]2C1=CC(=O)OC1)C)C	C23H34O5	390.51	28	0	0.87	1	5	3	105.92	86.99	2.72	1.1	2.58	2.73	2.55	2.34	-2.89	0.505	0.00129	Soluble	-2.52	1.18	0.00302	Soluble	-2.65	0.88	0.00225	Soluble	High	No	Yes	No	No	No	No	No	-7.9	0	0	0	0	0	0.55	0	0	1	5.55
Dehydroeburicoic acid	CC1=C[C@H]2OC(=O)[C@H]([C@@H]2CCC(=CCC1)C)O	C14H20O3	236.31	17	0	0.64	0	3	1	66.68	46.53	2.14	1.82	2.36	2.21	1.99	2.1	-2.45	0.835	0.00353	Soluble	-2.42	0.905	0.00383	Soluble	-1.86	3.25	0.0138	Soluble	High	Yes	No	No	No	No	No	No	-6.45	0	0	0	0	0	0.55	0	1	1	4.46
Dehydrosulphurenic acid	OC[C@@H]([C@H]1CC[C@@H]2[C@]1(C)[C@H](O)C[C@H]1[C@H]2CC=C2[C@]1(C)C(=O)C=CC2)[C@H]1CC(=C(C(=O)O1)CO[C@@H]1O[C@H](CO)[C@H]([C@@H]([C@H]1O)O)O)C	C34H48O11	632.74	45	0	0.76	7	11	6	161.55	183.21	3.21	0.9	0.94	0.31	1.4	1.35	-3.87	0.0858	0.000136	Soluble	-4.33	0.0294	4.65e-05	Moderately soluble	-1.69	12.8	0.0203	Soluble	Low	No	Yes	No	No	No	No	No	-9.52	3	3	1	1	4	0.17	0	1	1	7.64
Dehydrotomatine	OC(=O)CC[C@@]1(C)[C@H](CC[C@@]2([C@@H]1CC[C@H]1[C@@]2(C)CC[C@@H]1[C@]1(C)CCC(=O)O1)C)C(=C)C	C27H42O4	430.62	31	0	0.85	5	4	1	125.29	63.6	3.53	6.92	6.39	5.1	5.9	5.57	-6.54	0.000124	2.89e-07	Poorly soluble	-8.07	3.68e-06	8.56e-09	Poorly soluble	-5.72	0.000826	1.92e-06	Moderately soluble	High	No	No	No	No	Yes	No	No	-4.01	1	2	0	1	1	0.85	0	1	2	5.17
Demethylcalabaxanthone	Oc1cc2c(=O)oc3c4c2c(c1O)oc(=O)c4cc(c3O)O	C14H6O8	302.19	22	16	0	0	8	4	75.31	141.34	0.79	1.1	1.31	0.14	1.67	1	-2.94	0.343	0.00114	Soluble	-3.66	0.066	0.000218	Soluble	-3.35	0.136	0.000449	Soluble	High	No	No	Yes	No	No	No	No	-7.36	0	0	1	1	0	0.55	1	3	0	3.17
Demethylencecalin	O=C1C(=C2C=Cc3c(O2)cccc3)C(=O)C(C(=O)C1(C)C)(C)C	C19H18O4	310.34	23	6	0.32	0	4	0	86.47	60.44	2.67	4.01	3.01	1.62	4.11	3.08	-4.48	0.0102	3.28e-05	Moderately soluble	-4.98	0.00324	1.04e-05	Moderately soluble	-5.31	0.00151	4.85e-06	Moderately soluble	High	Yes	No	Yes	Yes	Yes	No	Yes	-5.35	0	0	0	0	0	0.85	0	3	1	3.54
Desacetyluvaricin	COc1cc2OC(C)(C)C=Cc2cc1C(=O)C	C14H16O3	232.28	17	6	0.36	2	3	0	67.25	35.53	2.62	2.5	2.97	1.76	3.2	2.61	-2.98	0.241	0.00104	Soluble	-2.89	0.298	0.00128	Soluble	-3.73	0.0429	0.000185	Soluble	High	Yes	No	Yes	Yes	No	No	No	-5.94	0	0	0	0	0	0.55	0	0	1	3.12
Diacetylphiladelphicalactone C	OCC1OC(OC2C(C)OC(C(C2O)O)OC2CCC3(C(C2)(O)CCC2C3CCC3(C2(O)CCC3C2=CC(=O)OC2)C)C=O)C(C(C1O)O)O	C35H52O15	712.78	50	0	0.89	7	15	8	169.76	242.13	3.82	-2.07	-1.43	-1.91	-0.99	-0.52	-2.49	2.29	0.00321	Soluble	-2.49	2.32	0.00325	Soluble	0.38	1730	2.42	Soluble	Low	No	No	No	No	No	No	No	-12.12	3	4	1	1	5	0.17	0	2	1	7.95
Diacetylwithaferin A	CC(=C)[C@@H]1CC[C@]2([C@H]1[C@H]1CC[C@H]3[C@@]([C@]1(C)CC2)(C)CC[C@@H]1[C@]3(C)CC[C@H](C1(C)C)O)C(=O)O	C30H48O3	456.7	33	0	0.9	2	3	2	136.91	57.53	3.91	8.21	7.09	5.82	5.75	6.16	-7.71	8.87e-06	1.94e-08	Poorly soluble	-9.28	2.4e-07	5.26e-10	Poorly soluble	-5.7	0.000909	1.99e-06	Moderately soluble	Low	No	No	No	No	Yes	No	No	-3.26	1	3	0	1	1	0.85	0	1	2	5.63
Dielsiquinone	COC(=O)c1c2[C@@H]3O[C@@H]3C(Oc2c2c(c1O)cccc2)(C)C	C17H16O5	300.31	22	10	0.35	2	5	1	80.02	68.29	2.75	3.11	2.62	1.78	3.17	2.69	-3.87	0.0409	0.000136	Soluble	-4.21	0.0184	6.13e-05	Moderately soluble	-4.17	0.0203	6.76e-05	Moderately soluble	High	Yes	Yes	Yes	Yes	Yes	Yes	No	-5.92	0	0	0	0	0	0.55	0	1	0	3.83
Digitoxigenin	CC(=O)O[C@H]1[C@H]2[C@@H](OC(=O)C2=C)C[C@H]([C@H]2[C@@]1(C)C(=O)CC2)C	C17H22O5	306.35	22	0	0.71	2	5	0	79.53	69.67	2.61	1.7	2.04	2	2.48	2.17	-2.68	0.642	0.0021	Soluble	-2.78	0.51	0.00167	Soluble	-2.79	0.503	0.00164	Soluble	High	Yes	No	No	No	No	No	No	-6.96	0	0	0	0	0	0.55	0	2	0	4.53
Digitoxin	Oc1cc2O[C@@H](CC(=O)c2c(c1)O)c1ccc(c(c1)O)O	C15H12O6	288.25	21	12	0.13	1	6	4	73.59	107.22	1.62	2.02	1.89	0.16	1.56	1.45	-3.26	0.16	0.000554	Soluble	-3.9	0.0364	0.000126	Soluble	-2.84	0.419	0.00145	Soluble	High	No	Yes	No	No	No	No	Yes	-6.62	0	0	0	0	0	0.55	1	1	0	3.11
Digoxigenin	CC(=CCc1c(O)ccc2c1OC[C@H]1[C@@H]2Oc2c1ccc(c2CC=C(C)C)O)C	C25H28O4	392.49	29	12	0.36	4	4	2	116.14	58.92	4.3	6.14	5.4	3.73	5.68	5.05	-6.18	0.000257	6.55e-07	Poorly soluble	-7.16	2.72e-05	6.92e-08	Poorly soluble	-6.07	0.000331	8.43e-07	Poorly soluble	High	Yes	No	No	Yes	Yes	No	Yes	-4.33	0	0	0	0	1	0.55	0	1	2	4.55
Digoxin	CC(=CCc1cc2c(cc1O)OCc1c2oc2c1ccc(c2CC=C(C)C)O)C	C25H26O4	390.47	29	15	0.28	4	4	2	117.67	62.83	4.26	6.67	6.27	3.58	6.42	5.44	-6.58	0.000102	2.62e-07	Poorly soluble	-7.79	6.3e-06	1.61e-08	Poorly soluble	-7.13	2.86e-05	7.33e-08	Poorly soluble	High	No	No	No	Yes	No	No	No	-3.95	0	1	0	1	1	0.55	0	1	2	4.23
Dihydro costunolide	COc1ccc2c(c1CC=C(C)C)O[C@@H]1[C@@]2(O)COc2c1cc(CC=C(C)C)c(c2)O	C26H30O5	422.51	31	12	0.38	5	5	2	121.65	68.15	4.25	5.38	4.7	3.1	5.75	4.64	-5.81	0.000661	1.57e-06	Moderately soluble	-6.57	0.000115	2.72e-07	Poorly soluble	-6.39	0.000171	4.04e-07	Poorly soluble	High	Yes	Yes	No	No	Yes	No	Yes	-5.06	0	0	0	0	1	0.55	0	1	2	4.73
Dinoxin B	CC(=CCc1cc(ccc1O)c1coc2c(c1=O)ccc(c2CC=C(C)C)O)C	C25H26O4	390.47	29	16	0.24	5	4	2	119.41	70.67	3.77	6.32	5.89	3.2	6.48	5.13	-6.32	0.000187	4.78e-07	Poorly soluble	-7.59	9.96e-06	2.55e-08	Poorly soluble	-7.45	1.4e-05	3.57e-08	Poorly soluble	High	No	No	No	Yes	No	No	Yes	-4.19	0	1	0	1	1	0.55	0	1	2	3.95
Eichlerialactone	COc1ccc2c(c1CC=C(C)C)O[C@@H]1[C@@]2(O)COc2c1ccc(c2)O	C21H22O5	354.4	26	12	0.33	3	5	2	97.93	68.15	3.11	4.34	3.19	2.12	3.94	3.34	-4.91	0.00431	1.22e-05	Moderately soluble	-5.49	0.00116	3.27e-06	Moderately soluble	-5.18	0.00234	6.59e-06	Moderately soluble	High	Yes	No	No	Yes	Yes	Yes	Yes	-5.38	0	0	0	0	0	0.55	0	1	2	4.22
Ellagic acid	CC(=CCc1cc2c(cc1O)OC[C@H]1[C@@H]2Oc2c1ccc(c2CC=C(C)C)O)C	C25H28O4	392.49	29	12	0.36	4	4	2	116.14	58.92	4.35	6.14	5.4	3.73	5.68	5.06	-6.18	0.000257	6.55e-07	Poorly soluble	-7.16	2.72e-05	6.92e-08	Poorly soluble	-6.07	0.000331	8.43e-07	Poorly soluble	High	Yes	No	No	Yes	Yes	No	Yes	-4.33	0	0	0	0	1	0.55	0	1	2	4.55
Emorydone	COc1cc(ccc1O)C[C@@H]([C@@H](Cc1ccc2c(c1)OCO2)C)C	C20H24O4	328.4	24	12	0.4	6	4	1	94.51	47.92	3.82	5.16	4.19	3.21	4.85	4.25	-5.1	0.0026	7.93e-06	Moderately soluble	-5.91	0.000402	1.22e-06	Moderately soluble	-5.88	0.000438	1.33e-06	Moderately soluble	High	Yes	No	No	Yes	Yes	Yes	No	-4.64	0	0	0	0	1	0.55	0	0	1	3.58
Encecalin	O=C[C@@]12O[C@@]2(C#C)C(=O)C[C@H]2[C@H]1[C@@H](O)C[C@@H]1[C@]2(C)CCCC1(C)C	C20H26O4	330.42	24	0	0.8	1	4	1	90.16	66.9	2.6	2.45	2.21	1.99	3.7	2.59	-3.37	0.142	0.00043	Soluble	-3.5	0.105	0.000317	Soluble	-3.01	0.322	0.000975	Soluble	High	Yes	No	No	No	No	No	No	-6.58	0	0	0	0	0	0.55	0	3	0	5.42
convalloside	OC[C@@]12O[C@@]2(C#C)C(=O)C[C@H]2[C@H]1[C@@H](O)C[C@@H]1[C@]2(C)CCCC1(C)C	C20H28O4	332.43	24	0	0.85	1	4	2	91.12	70.06	2.66	2.27	2	2.09	3.39	2.48	-3.27	0.181	0.000543	Soluble	-3.38	0.139	0.000419	Soluble	-2.89	0.427	0.00129	Soluble	High	Yes	Yes	No	No	No	No	No	-6.72	0	0	0	0	0	0.55	0	2	0	5.47
Epi-betulinic acid	COc1c(O)cc2c(c1O)c(=O)cc(o2)c1ccc(c(c1)O)O	C16H12O7	316.26	23	16	0.06	2	7	4	82.5	120.36	2.13	2.5	2.29	-0.31	2.06	1.74	-3.76	0.0551	0.000174	Soluble	-4.67	0.00671	2.12e-05	Moderately soluble	-3.94	0.0365	0.000115	Soluble	High	No	No	Yes	No	No	Yes	Yes	-6.45	0	0	0	0	0	0.55	1	1	0	3.18
Epoxymollugin	CC(=C)c1cc2c(o1)cc(c(c2)C(=O)C)O	C13H12O3	216.23	16	9	0.15	2	3	1	63.33	50.44	2.48	3.64	3.37	1.33	3.25	2.82	-3.76	0.0377	0.000175	Soluble	-4.39	0.00886	4.1e-05	Moderately soluble	-3.89	0.028	0.000129	Soluble	High	Yes	No	Yes	Yes	No	No	No	-5.03	0	0	0	0	0	0.55	0	0	2	2.57
Ergolide	COc1cc2oc(cc(=O)c2c(c1OC)O)c1ccc(c(c1)O)OC	C18H16O7	344.32	25	16	0.17	4	7	2	91.44	98.36	3.07	3.4	2.9	0.17	3.12	2.53	-4.33	0.0162	4.72e-05	Moderately soluble	-5.14	0.00247	7.16e-06	Moderately soluble	-5.33	0.00163	4.72e-06	Moderately soluble	High	No	No	Yes	No	Yes	Yes	Yes	-5.99	0	0	0	0	0	0.55	0	0	0	3.43
Eriodictyol	Oc1ccc2c(c1)c(=O)c1c(o2)cccc1O	C13H8O4	228.2	17	14	0	0	4	2	64.04	70.67	2	2.8	2.36	0.87	2.48	2.1	-3.63	0.0537	0.000235	Soluble	-3.94	0.0262	0.000115	Soluble	-4.14	0.0164	7.18e-05	Moderately soluble	High	Yes	No	Yes	No	No	Yes	Yes	-5.7	0	0	0	0	0	0.55	0	1	1	2.74
Erybraedin A	COc1cc2CCN([C@@H]3c2c(c1O)Oc1cc2c(cc1OC)CCN([C@H]2Cc1ccc(Oc2cc(C3)ccc2OC)cc1)C)C	C37H40N2O6	608.72	45	24	0.35	3	8	1	181.6	72.86	4.88	6.34	5.45	3.55	5.5	5.14	-7.8	9.54e-06	1.57e-08	Poorly soluble	-7.66	1.33e-05	2.19e-08	Poorly soluble	-10.12	4.61e-08	7.57e-11	Insoluble	High	No	No	No	No	No	No	No	-5.51	1	3	0	0	2	0.55	0	0	2	6.89
Erycristagallin	COc1ccc(cc1)[C@]12Oc3cc(OC)cc(c3[C@@]([C@H]2O)([C@@H]([C@H]1C(=O)NCCCCNC(=O)c1ccccc1)c1ccccc1)O)OC	C38H40N2O8	652.73	48	24	0.32	14	8	4	178.19	135.58	4.53	3.78	4.07	1.78	5.33	3.9	-5.71	0.00126	1.93e-06	Moderately soluble	-6.32	0.000312	4.78e-07	Poorly soluble	-10.83	9.57e-09	1.47e-11	Insoluble	Low	No	Yes	Yes	Yes	No	No	Yes	-7.6	1	3	1	1	1	0.55	0	0	3	6.55
Erystagallin A	COc1ccc(cc1)[C@]12Oc3cc(OC)cc(c3[C@@]([C@H]2O)([C@@H]([C@H]1C(=O)NCCCCNC(=O)c1ccccc1)c1ccccc1)O)OC	C38H40N2O8	652.73	48	24	0.32	14	8	4	178.19	135.58	4.53	3.78	4.07	1.78	5.33	3.9	-5.71	0.00126	1.93e-06	Moderately soluble	-6.32	0.000312	4.78e-07	Poorly soluble	-10.83	9.57e-09	1.47e-11	Insoluble	Low	No	Yes	Yes	Yes	No	No	Yes	-7.6	1	3	1	1	1	0.55	0	0	3	6.55
Erysubin F	O=C1CC(=O)[C@H]2[C@@]([C@@H]1C)(C)CC[C@@H]1[C@@]2(C)CC[C@]2([C@@]1(C)CC[C@]1([C@@H]2CC(C)(C)CC1)C)C	C30H48O2	440.7	32	0	0.93	0	2	0	134.59	34.14	4.09	9.16	7.64	5.89	7.21	6.8	-8.34	2e-06	4.54e-09	Poorly soluble	-9.77	7.42e-08	1.68e-10	Poorly soluble	-7.75	7.8e-06	1.77e-08	Poorly soluble	Low	No	No	No	No	No	No	No	-2.48	1	3	0	1	1	0.55	0	1	2	5.23
Erythrabissin-1	O=C1CC[C@@H]2[C@]([C@@H]1C)(C)CC[C@H]1[C@]2(C)CC[C@]2([C@@]1(C)CC[C@@]1([C@@H]2CC(C)(C)CC1)C)C	C30H50O	426.72	31	0	0.97	0	1	0	134.39	17.07	4.49	9.8	8.46	6.92	7.52	7.44	-8.66	9.34e-07	2.19e-09	Poorly soluble	-10.08	3.56e-08	8.33e-11	Insoluble	-7.88	5.66e-06	1.33e-08	Poorly soluble	Low	No	No	No	No	No	No	No	-1.94	1	3	0	1	2	0.55	0	0	2	5.17
Erythrabyssin II	COC(=O)c1c(O)c2ccccc2c2c1cco2	C14H10O4	242.23	18	13	0.07	2	4	1	67.02	59.67	2.01	3.62	3.08	1.71	2.81	2.64	-4.02	0.0229	9.44e-05	Moderately soluble	-4.56	0.00666	2.75e-05	Moderately soluble	-4.47	0.00821	3.39e-05	Moderately soluble	High	Yes	No	Yes	No	No	No	No	-5.21	0	0	0	0	0	0.55	0	0	2	2.55
Erythro-austrobailignan-6	C[C@@H]1[C@H](O[C@H]([C@H]1C)c1ccc2c(c1)OCO2)c1ccc2c(c1)OCO2	C20H20O5	340.37	25	12	0.4	2	5	0	91.03	46.15	3.62	4.12	3.58	2.79	3.8	3.58	-4.77	0.00579	1.7e-05	Moderately soluble	-4.8	0.00545	1.6e-05	Moderately soluble	-5.09	0.00277	8.15e-06	Moderately soluble	High	Yes	No	No	Yes	Yes	Yes	No	-5.45	0	0	0	0	0	0.55	0	0	1	4.06
Escobarine A	COc1cc(ccc1OC)[C@@H]1O[C@@H]([C@H]([C@H]1C)C)c1ccc(c(c1)OC)OC	C22H28O5	372.45	27	12	0.45	6	5	0	104.87	46.15	3.97	4.38	4.16	2.42	4.27	3.84	-4.84	0.00536	1.44e-05	Moderately soluble	-5.07	0.0032	8.6e-06	Moderately soluble	-6.07	0.000316	8.49e-07	Poorly soluble	High	Yes	No	No	No	No	Yes	No	-5.46	0	0	0	0	0	0.55	0	0	2	4.12
Escobarine B	OC(=O)c1cc(O)c(c(c1)O)O	C7H6O5	170.12	12	6	0	1	5	4	39.47	97.99	0.21	0.7	0.5	-0.16	-0.2	0.21	-1.64	3.9	0.0229	Very soluble	-2.34	0.786	0.00462	Soluble	-0.04	155	0.91	Soluble	High	No	No	No	No	No	No	Yes	-6.84	0	2	0	0	1	0.56	1	1	1	1.22
Eupafolin	CC(=CCCc1c(O)cc2c(c1O)c(=O)c1c(o2)cc(c(c1CCCC(O)(C)C)O)O)C	C25H30O7	442.5	32	14	0.4	7	7	5	126.81	131.36	3.86	5.22	4.76	1.67	5.2	4.14	-5.73	0.000817	1.85e-06	Moderately soluble	-7.73	8.31e-06	1.88e-08	Poorly soluble	-6.01	0.000435	9.84e-07	Poorly soluble	Low	No	No	Yes	No	No	No	No	-5.29	0	0	0	0	1	0.55	1	3	2	4.07
Euparin	COc1c(O)cc2c(c1CCC(O)(C)C)c(=O)c1c(o2)cc(c(c1O)CC=C(C)C)O	C24H28O7	428.47	31	14	0.38	6	7	4	121.66	120.36	3.99	4.9	4.28	1.46	4.94	3.91	-5.52	0.00129	3.01e-06	Moderately soluble	-7.16	2.94e-05	6.86e-08	Poorly soluble	-5.91	0.000524	1.22e-06	Moderately soluble	High	No	No	No	No	No	No	No	-5.43	0	0	0	0	0	0.55	0	2	2	4.02
Eupatorin	CC(=CCc1c(O)c(O)c(c2c1c(=O)c1c(o2)cc(c(c1O)CC=C(C)C)O)CC=C(C)C)C	C28H32O6	464.55	34	14	0.32	6	6	4	139.24	111.13	4.72	7.87	6.29	2.93	6.83	5.73	-7.59	1.2e-05	2.59e-08	Poorly soluble	-10.05	4.12e-08	8.88e-11	Insoluble	-6.66	0.000103	2.21e-07	Poorly soluble	Low	No	No	No	No	No	No	No	-3.55	0	2	0	1	1	0.55	1	3	2	4.45
Euxanthone	CC(=CCc1c(O)c(CC=C(C)C)c(c2c1oc1c(O)ccc(c1c2=O)O)O)C	C23H24O6	396.43	29	14	0.26	4	6	4	115.52	111.13	3.85	5.95	4.79	1.98	4.96	4.31	-6.14	0.000287	7.25e-07	Poorly soluble	-8.06	3.46e-06	8.72e-09	Poorly soluble	-5.45	0.0014	3.54e-06	Moderately soluble	High	No	No	Yes	No	Yes	No	No	-4.49	0	0	0	0	1	0.55	0	3	2	3.89
Fangchinoline	Oc1ccc(cc1)c1coc2c(c1=O)c(O)cc(c2)O	C15H10O5	270.24	20	16	0	1	5	3	73.99	90.9	1.91	2.67	2.58	0.52	2.52	2.04	-3.72	0.0511	0.000189	Soluble	-4.23	0.0159	5.88e-05	Moderately soluble	-4.4	0.0107	3.94e-05	Moderately soluble	High	No	No	Yes	No	No	Yes	Yes	-6.05	0	0	0	0	0	0.55	0	0	0	2.87
Foveoglin A	CCCCCCCCCCCC[C@H]([C@H]1CC[C@H](O1)[C@H](CC[C@H]([C@@H]1CC[C@@H](O1)CCCCC[C@@H](CC1=C[C@H](OC1=O)C)O)O)O)O	C37H66O8	638.92	45	0	0.92	25	8	4	181.26	125.68	7	8.17	6.83	3.02	8.47	6.7	-7.3	3.21e-05	5.03e-08	Poorly soluble	-10.67	1.37e-08	2.15e-11	Insoluble	-6.92	7.68e-05	1.2e-07	Poorly soluble	Low	No	No	No	No	No	No	Yes	-4.4	1	4	1	1	3	0.55	0	0	3	7.72
Foveoglin B	O[C@H]1CC[C@]2([C@@H](C1)CC[C@@H]1[C@@H]2CC[C@]2([C@]1(O)C[C@@H]([C@@H]2C1=CC(=O)OC1)O)C)C	C23H34O5	390.51	28	0	0.87	1	5	3	105.92	86.99	2.68	1.6	2.58	2.73	2.55	2.43	-3.2	0.245	0.000626	Soluble	-3.04	0.358	0.000916	Soluble	-2.65	0.88	0.00225	Soluble	High	No	Yes	No	No	No	No	No	-7.55	0	0	0	0	0	0.55	0	0	1	5.7
Friedelan-1,3-dione	CCCCCCCCCC[C@H]([C@H]1CC[C@@H](O1)[C@@H](CCCC[C@@H](CCCCCCC[C@H](CC1=C[C@@H](OC1=O)C)O)O)O)O	C35H64O7	596.88	42	0	0.91	26	7	4	172.67	116.45	7.02	8.42	7.06	3.46	8.88	6.97	-7.13	4.43e-05	7.43e-08	Poorly soluble	-10.73	1.1e-08	1.84e-11	Insoluble	-7.4	2.39e-05	4e-08	Poorly soluble	Low	No	No	No	No	No	No	Yes	-3.96	1	4	1	1	2	0.55	0	0	3	7.36
Friedelin	CCCCCCCCCC[C@@H]([C@H](CCCC[C@H]1CC[C@@H](O1)[C@H]1CC[C@@H](O1)[C@@H](CCCCC[C@H](CC1=C[C@@H](OC1=O)C)O)O)O)O	C37H66O8	638.92	45	0	0.92	25	8	4	181.26	125.68	7.19	7.81	6.83	3.02	8.47	6.66	-7.07	5.42e-05	8.48e-08	Poorly soluble	-10.29	3.24e-08	5.07e-11	Insoluble	-6.92	7.68e-05	1.2e-07	Poorly soluble	Low	No	No	No	No	No	No	Yes	-4.65	1	4	1	1	3	0.55	0	0	3	7.76
Furomollugin	OCc1cc2oc3cc(O)c(c(c3c(=O)c2c(c1CC=C(C)C)O)CC=C(C)C)O	C24H26O6	410.46	30	14	0.29	5	6	4	119.63	111.13	3.98	5.42	4.42	1.92	5.37	4.22	-5.81	0.000629	1.53e-06	Moderately soluble	-7.51	1.27e-05	3.1e-08	Poorly soluble	-5.84	0.000589	1.44e-06	Moderately soluble	High	No	No	No	No	Yes	No	No	-4.96	0	0	0	0	1	0.55	1	3	2	3.97
Galbacin	CCCCCCCCCCCCCCCC[C@H]([C@H]1CC[C@@H](O1)[C@@H](CC[C@@H](CCCCC[C@H](CC1=C[C@@H](OC1=O)C)O)O)O)O	C37H68O7	624.93	44	0	0.92	28	7	4	182.29	116.45	7.56	9.87	7.84	3.81	9.74	7.76	-8.08	5.14e-06	8.23e-09	Poorly soluble	-12.24	3.61e-10	5.77e-13	Insoluble	-8.17	4.23e-06	6.76e-09	Poorly soluble	Low	No	No	No	No	No	No	Yes	-3.1	1	4	1	1	3	0.55	0	0	3	7.62
Galbelgin	CCCCCCCCCCCCCC[C@@H]([C@@H]1CC[C@@H](O1)[C@@H](CC[C@H](CCCCC[C@@H](CC1=C[C@H](OC1=O)C)O)O)O)O	C35H64O7	596.88	42	0	0.91	26	7	4	172.67	116.45	6.68	8.78	7.06	3.46	8.88	6.97	-7.36	2.63e-05	4.41e-08	Poorly soluble	-11.11	4.66e-09	7.8e-12	Insoluble	-7.4	2.39e-05	4e-08	Poorly soluble	Low	No	No	No	No	No	No	Yes	-3.71	1	4	1	1	2	0.55	0	0	3	7.36
Gallic acid	OC[C@]1(C)[C@@H](O)CC[C@]2([C@H]1CC[C@@]1([C@@H]2CC=C2[C@@]1(C)CC[C@@]1([C@H]2CC(CC1)(C)C)C(=O)O)C)C	C30H48O4	472.7	34	0	0.9	2	4	3	137.82	77.76	3.48	6.82	6.21	4.97	5.24	5.34	-6.94	5.49e-05	1.16e-07	Poorly soluble	-8.26	2.59e-06	5.48e-09	Poorly soluble	-5.55	0.00134	2.83e-06	Moderately soluble	High	No	Yes	No	No	No	No	No	-4.34	1	3	0	1	1	0.56	0	1	2	6.24
Garcinone C	OC[C@H]1O[C@@H](OC(=O)[C@@]23CCC(C[C@H]3C3=CC[C@H]4[C@@]([C@@]3(CC2)C)(C)CC[C@@H]2[C@]4(C)CC[C@@H]([C@]2(C)CO)O)(C)C)[C@@H]([C@H]([C@@H]1O)O)O	C36H58O9	634.84	45	0	0.92	5	9	6	169.79	156.91	3.54	5.01	3.46	2.48	3.17	3.53	-6.6	0.000159	2.5e-07	Poorly soluble	-8.05	5.72e-06	9.01e-09	Poorly soluble	-3.74	0.115	0.000181	Soluble	Low	No	Yes	No	No	No	No	No	-6.62	2	3	1	1	4	0.17	0	1	2	7.75
Garcinone D	OCC1(C)[C@H](CC[C@]2(C1CC[C@@]1([C@@H]2CC=C2[C@@]1(C)CC[C@@]1([C@@H]2CC(CC1)(C)C)C(=O)O)C)C)O[C@@H]1OC[C@@H]([C@@H]([C@H]1O)O)O	C35H56O8	604.81	43	0	0.91	4	8	5	164.23	136.68	3.84	4.74	4.67	3.07	3.65	3.99	-6.31	0.000295	4.87e-07	Poorly soluble	-7.34	2.76e-05	4.57e-08	Poorly soluble	-4.18	0.0396	6.55e-05	Moderately soluble	Low	No	Yes	No	No	No	No	No	-6.62	1	3	0	1	1	0.56	0	2	2	7.65
Garcinone E	COc1cc(ccc1O)[C@H]1CC(=O)c2c(O1)c(CC=C(C)C)c(c(c2O)CC=C(C)C)O	C26H30O6	438.51	32	12	0.35	6	6	3	125.5	96.22	4.15	6.21	5.21	2.48	5.64	4.74	-6.35	0.000195	4.44e-07	Poorly soluble	-8.02	4.23e-06	9.64e-09	Poorly soluble	-5.97	0.000469	1.07e-06	Moderately soluble	High	No	No	No	No	Yes	No	Yes	-4.57	0	0	0	0	1	0.55	0	1	2	4.4
Gartanin	O[C@@H]([C@@H](C(O)(C)C)O)C[C@@H]([C@@H]1CC[C@]2([C@@]1(C)CC[C@H]1C2=CC[C@@H]2[C@]1(C)CC[C@@H](C2(C)C)O)C)C	C30H52O4	476.73	34	0	0.93	5	4	4	141.04	80.92	3.17	5.76	5.47	4.27	5.26	4.79	-6.09	0.000383	8.04e-07	Poorly soluble	-7.23	2.82e-05	5.92e-08	Poorly soluble	-4.62	0.0114	2.38e-05	Moderately soluble	High	No	Yes	No	No	No	No	No	-5.12	1	2	0	0	1	0.55	0	1	2	6.6
Genistein	CC(=CCC[C@]1(C)[C@@H](CC=C(C)C)C[C@]2(C(=O)[C@]1(C(=O)C(C)C)C(=O)C(=C2O)CC=C(C)C)CC=C(C)C)C	C35H52O4	536.78	39	0	0.63	11	4	1	165.15	71.44	5.82	9.63	8.99	4.57	9.62	7.73	-8.51	1.66e-06	3.1e-09	Poorly soluble	-11.04	4.85e-09	9.03e-12	Insoluble	-7.7	1.06e-05	1.98e-08	Poorly soluble	Low	No	Yes	No	No	No	No	No	-2.74	2	4	1	1	1	0.85	0	2	3	7.33
Gigantecin	CCCCCCCCCC[C@@H]([C@H]1CC[C@@H](O1)[C@H]1CC[C@@H](O1)[C@@H](CCCCCCCCCCCCC1=C[C@H](OC1=O)C)O)O	C37H66O6	606.92	43	0	0.92	25	6	2	178.94	85.22	7.64	11.23	8.89	4.61	10	8.47	-9.03	5.69e-07	9.38e-10	Poorly soluble	-12.99	6.15e-11	1.01e-13	Insoluble	-8.83	9.06e-07	1.49e-09	Poorly soluble	Low	No	Yes	No	No	No	No	Yes	-2.03	2	4	1	1	3	0.17	0	0	3	7.39
Gitoxigenin	C[C@H]1CCCC(=C[C@@H]2[C@H](CC1)C(=C)C(=O)O2)C	C15H22O2	234.33	17	0	0.67	0	2	0	70.33	26.3	2.73	3.21	3.63	3.35	3.26	3.24	-3.32	0.113	0.000484	Soluble	-3.43	0.0862	0.000368	Soluble	-3.07	0.199	0.000849	Soluble	High	Yes	No	No	Yes	Yes	No	No	-5.45	0	0	0	0	0	0.55	0	2	1	4.54
Gitoxin	COc1cc(OC)c2c(c1)O[C@@]1([C@@H]([C@@]2(O)[C@H]([C@@H]1c1ccccc1)C(=O)NCCCCNC(=O)c1ccccc1)O)c1ccc(cc1)OC	C38H40N2O8	652.73	48	24	0.32	14	8	4	178.19	135.58	4.89	4.33	4.07	1.78	5.33	4.08	-6.06	0.000567	8.69e-07	Poorly soluble	-6.89	8.38e-05	1.28e-07	Poorly soluble	-10.83	9.57e-09	1.47e-11	Insoluble	Low	No	Yes	Yes	Yes	No	No	Yes	-7.21	1	3	1	1	1	0.55	0	0	3	6.55
Glacins A	COc1cc2C[C@@H](C)[C@H]([C@@H](c2cc1O)c1ccc(c(c1)OC)O)C	C20H24O4	328.4	24	12	0.4	3	4	2	95.01	58.92	3.38	4.49	4.08	2.81	3.75	3.7	-4.88	0.00436	1.33e-05	Moderately soluble	-5.45	0.00117	3.57e-06	Moderately soluble	-5.19	0.00214	6.52e-06	Moderately soluble	High	Yes	No	No	Yes	No	Yes	No	-5.12	0	0	0	0	0	0.55	0	0	1	3.75
Glacins B	O[C@@H]1C[C@@H]2[C@]([C@@H]1[C@]([C@H]([C@@H]1OC(=O)[C@@H]([C@H]1C)C)O)(O)C)(C)CC[C@H]1[C@@H]2C[C@H]2O[C@]32[C@]1(C)C(=O)C=C[C@@H]3O	C28H40O8	504.61	36	0	0.86	3	8	4	130.33	136.82	3.3	2.11	1.37	1.26	1.9	1.99	-4.1	0.0401	7.95e-05	Moderately soluble	-4.61	0.0123	2.43e-05	Moderately soluble	-1.7	10.1	0.02	Soluble	High	No	Yes	No	No	No	No	No	-7.88	1	3	0	1	0	0.55	0	1	1	7.08
G-Mangostin	OC[C@H]1O[C@@H](Oc2c(oc3c(c2=O)c(O)ccc3)c2ccc(cc2)O)[C@@H]([C@H]([C@@H]1O)O)O	C21H20O10	432.38	31	16	0.29	4	10	6	106.11	170.05	2.05	1.07	0.05	-1.61	0.35	0.38	-3.31	0.21	0.000487	Soluble	-4.23	0.0253	5.85e-05	Moderately soluble	-2.69	0.877	0.00203	Soluble	Low	No	Yes	No	No	No	No	No	-8.18	1	0	1	1	2	0.55	0	0	1	5.24
Goniotetracin	OC[C@H]1O[C@@H](Oc2c(oc3c(c2=O)c(O)cc(c3)O)c2ccc(cc2)O)[C@@H]([C@H]([C@@H]1O)O)O	C21H20O11	448.38	32	16	0.29	4	11	7	108.13	190.28	1.29	0.72	-0.24	-2.1	-0.12	-0.09	-3.18	0.297	0.000661	Soluble	-4.29	0.0228	5.08e-05	Moderately soluble	-2.1	3.55	0.00791	Soluble	Low	No	No	No	No	No	No	No	-8.52	2	0	1	1	3	0.17	0	0	1	5.29
Goniothalamicin	COc1c(oc2c(c1=O)c(O)cc(c2)O[C@@H]1O[C@H](C)[C@@H]([C@@H]([C@H]1O)O)O)c1ccc(cc1)O	C22H22O10	446.4	32	16	0.32	4	10	5	111.44	159.05	2.39	1.54	1.09	-1.12	1.02	0.98	-3.68	0.0924	0.000207	Soluble	-4.49	0.0145	3.24e-05	Moderately soluble	-3.36	0.193	0.000433	Soluble	Low	No	Yes	No	No	No	No	Yes	-7.93	0	0	1	1	1	0.55	0	0	1	5.32
Hederagenin	CC(=C[C@@H](C[C@H]([C@H]1CC[C@@]2([C@]1(C)CC[C@@]13[C@H]2C=C[C@]2([C@H]3CC[C@@H](C2(C)C)O)OC1)C)C)O)C	C30H48O3	456.7	33	0	0.87	4	3	2	137.21	49.69	4.48	6.72	6.29	5.01	5.94	5.69	-6.64	0.000104	2.28e-07	Poorly soluble	-7.57	1.23e-05	2.7e-08	Poorly soluble	-5.18	0.00301	6.59e-06	Moderately soluble	High	No	No	No	No	No	No	No	-4.31	1	3	0	1	1	0.55	0	1	2	7.79
Hederagenin 28-O-beta-D-glucopyranosyl ester	COc1cc2OC(c3ccccc3)C(C(=O)c2c(c1)O)O	C16H14O5	286.28	21	12	0.19	2	5	2	75.18	75.99	2.35	1.99	1.75	0.69	2.15	1.79	-3.16	0.198	0.000693	Soluble	-3.21	0.176	0.000614	Soluble	-3.88	0.0373	0.00013	Soluble	High	No	No	No	No	No	No	No	-6.63	0	0	0	0	0	0.55	0	0	0	3.48
Hederagenin 3-O-alpha-L-arabinopyranoside	C/C=C/c1cc2c(c(c1)OC)O[C@@H]([C@H]2C)c1ccc(c(c1)OC)O	C20H22O4	326.39	24	12	0.3	4	4	1	94.98	47.92	3.74	4.38	4.25	2.73	4.36	3.89	-4.73	0.00609	1.87e-05	Moderately soluble	-5.1	0.00258	7.9e-06	Moderately soluble	-5.26	0.00177	5.43e-06	Moderately soluble	High	Yes	No	No	Yes	Yes	Yes	No	-5.18	0	0	0	0	0	0.55	0	0	1	3.94
Hiravanone	COc1cc(ccc1OC)c1oc2c(OC)c(OC)cc(c2c(=O)c1OC)OC	C21H22O8	402.39	29	16	0.29	7	8	0	106.87	85.59	3.7	3.22	3.51	0.34	4.28	3.01	-4.31	0.0197	4.9e-05	Moderately soluble	-4.69	0.00822	2.04e-05	Moderately soluble	-6.82	6.16e-05	1.53e-07	Poorly soluble	High	No	No	No	No	Yes	No	Yes	-6.47	0	0	0	0	0	0.55	0	0	1	3.96
Hispidol B	OC[C@H]1O[C@@H](OC(C#N)(C)C)[C@@H]([C@H]([C@@H]1O)O)O	C10H17NO6	247.25	17	0	0.9	3	7	4	54.67	123.17	1.63	-2.27	-1.89	-2.39	-1.59	-1.3	0.26	445	1.8	Highly soluble	0.22	408	1.65	Highly soluble	1.38	5970	24.2	Soluble	Low	No	Yes	No	No	No	No	No	-9.42	0	1	0	0	1	0.55	0	0	1	4.45
Hyperforin	CCCCCCCCCCCC[C@H]([C@H]1CC[C@@H](O1)[C@H]1CC[C@@H](O1)[C@@H](CC[C@@H](CCCCCCCC1=C[C@@H](OC1=O)C)O)O)O	C37H66O7	622.92	44	0	0.92	25	7	3	180.1	105.45	7.35	9.7	7.86	3.81	9.23	7.59	-8.16	4.28e-06	6.87e-09	Poorly soluble	-11.83	9.19e-10	1.47e-12	Insoluble	-7.87	8.35e-06	1.34e-08	Poorly soluble	Low	No	No	No	No	No	No	Yes	-3.21	1	4	1	1	3	0.55	0	0	3	7.56
Isodesacetyluvaricin	CCCCCCCCCCCC[C@H]([C@H]1CC[C@@H](O1)[C@H]1CC[C@@H](O1)[C@@H](CCCCCC[C@H](CC1=C[C@@H](OC1=O)C)O)O)O	C35H62O7	594.86	42	0	0.91	23	7	3	170.48	105.45	6.13	8.62	7.08	3.46	8.38	6.73	-7.44	2.16e-05	3.62e-08	Poorly soluble	-10.71	1.16e-08	1.95e-11	Insoluble	-7.1	4.71e-05	7.93e-08	Poorly soluble	Low	No	No	No	No	No	No	Yes	-3.81	1	4	1	1	2	0.55	0	0	3	7.39
Isodihydrocostunolide	CCCCCCCCCCCCCC[C@H]([C@H]1CC[C@@H](O1)[C@H]1CC[C@@H](O1)[C@@H](CCCC[C@H](CC1=C[C@@H](OC1=O)C)O)O)O	C35H62O7	594.86	42	0	0.91	23	7	3	170.48	105.45	6.19	8.62	7.08	3.46	8.38	6.74	-7.44	2.16e-05	3.62e-08	Poorly soluble	-10.71	1.16e-08	1.95e-11	Insoluble	-7.1	4.71e-05	7.93e-08	Poorly soluble	Low	No	No	No	No	No	No	Yes	-3.81	1	4	1	1	2	0.55	0	0	3	7.39
Isofoveoglin	CCCCCCCCCCCCCC[C@H]([C@H]1CC[C@@H](O1)[C@H]1CC[C@@H](O1)[C@@H](CCCCCC[C@H](CC1=C[C@@H](OC1=O)C)O)O)O	C37H66O7	622.92	44	0	0.92	25	7	3	180.1	105.45	7.01	9.7	7.86	3.81	9.23	7.52	-8.16	4.28e-06	6.87e-09	Poorly soluble	-11.83	9.19e-10	1.47e-12	Insoluble	-7.87	8.35e-06	1.34e-08	Poorly soluble	Low	No	No	No	No	No	No	Yes	-3.21	1	4	1	1	3	0.55	0	0	3	7.65
Isoguaiacin	CC(=C)[C@@H]1CC[C@]2([C@H]1[C@H]1CC[C@H]3[C@@]([C@]1(C)CC2)(C)CC[C@@H]1[C@]3(C)CC[C@@H](C1(C)C)O)C	C30H50O	426.72	31	0	0.93	1	1	1	135.14	20.23	4.72	9.87	8.02	6.92	6.82	7.27	-8.64	9.83e-07	2.3e-09	Poorly soluble	-10.22	2.58e-08	6.05e-11	Insoluble	-6.74	7.69e-05	1.8e-07	Poorly soluble	Low	No	No	No	No	No	No	No	-1.9	1	3	0	1	2	0.55	0	1	2	5.49
Ixocarpalactone A	CC(=CCc1c2O[C@@H](CC(=O)c2c(c2c1OC(C)(C)C=C2)O)c1ccc(cc1)O)C	C25H26O5	406.47	30	12	0.32	3	5	2	117.39	75.99	3.22	5.6	5.06	2.82	5.2	4.38	-5.99	0.00042	1.03e-06	Moderately soluble	-6.96	4.48e-05	1.1e-07	Poorly soluble	-6.04	0.000367	9.04e-07	Poorly soluble	High	No	No	No	Yes	Yes	No	Yes	-4.8	0	0	0	0	1	0.55	0	1	2	4.53
Kaempferol 3-O-beta-D-glucopyranoside	Oc1ccc(c(c1)O)C(=O)/C=C/c1ccc(cc1)Oc1cc(ccc1O)/C=C/C(=O)c1ccc(cc1O)O	C30H22O8	510.49	38	24	0	8	8	5	142.69	144.52	2.79	6.31	5.58	2.12	4.87	4.33	-6.92	6.14e-05	1.2e-07	Poorly soluble	-9.13	3.75e-07	7.35e-10	Poorly soluble	-6.7	0.000102	1.99e-07	Poorly soluble	Low	No	No	Yes	No	Yes	No	No	-4.93	1	2	1	1	1	0.55	0	1	3	3.74
Kaempferol 5-O-beta-D-glucopyranoside	C[C@H]([C@@H](Cc1ccc2c(c1)OCO2)C)Cc1ccc2c(c1)OCO2	C20H22O4	326.39	24	12	0.4	5	4	0	92.06	36.92	3.78	5.35	4.2	3.62	5.16	4.42	-5.27	0.00174	5.32e-06	Moderately soluble	-5.88	0.000432	1.32e-06	Moderately soluble	-6.08	0.000274	8.39e-07	Poorly soluble	High	Yes	No	No	Yes	Yes	Yes	Yes	-4.49	0	0	0	0	1	0.55	0	0	1	3.5
Kaempferol-3-methoxy-7-O-alpha-L-rhamnoside	COc1cc(ccc1O)[C@@H]1O[C@@H]([C@H]([C@H]1C)C)c1ccc2c(c1)OCO2	C20H22O5	342.39	25	12	0.4	3	5	1	93.48	57.15	3.52	3.93	3.57	2.38	3.49	3.38	-4.6	0.00868	2.54e-05	Moderately soluble	-4.83	0.00507	1.48e-05	Moderately soluble	-4.89	0.00444	1.3e-05	Moderately soluble	High	Yes	Yes	No	Yes	No	Yes	No	-5.6	0	0	0	0	0	0.55	0	0	1	4.13
Karavilagenin E	COc1cc(ccc1OC)[C@@H]1O[C@@H]([C@H]([C@H]1C)C)c1ccc2c(c1)OCO2	C21H24O5	356.41	26	12	0.43	4	5	0	97.95	46.15	3.84	4.25	3.87	2.61	4.02	3.72	-4.8	0.00559	1.57e-05	Moderately soluble	-4.93	0.00418	1.17e-05	Moderately soluble	-5.58	0.000935	2.62e-06	Moderately soluble	High	Yes	No	No	Yes	No	Yes	No	-5.46	0	0	0	0	0	0.55	0	0	2	4.24
(2R,3R)-3,5-dihydroxy-7-methoxy?avanone	CC(=CCC[C@@]1(C)C=Cc2c(O1)ccc1c2[nH]c2c1cc(cc2)C)C	C23H25NO	331.45	25	13	0.3	3	1	1	108.45	25.02	3.97	6.63	6.43	4.66	6.51	5.64	-6.26	0.000183	5.51e-07	Poorly soluble	-6.96	3.66e-05	1.11e-07	Poorly soluble	-7.47	1.12e-05	3.38e-08	Poorly soluble	High	No	Yes	Yes	Yes	Yes	Yes	Yes	-3.61	1	1	0	1	1	0.55	0	1	1	4.05
Licarin A	CC(=CCC[C@@]1(C)C=Cc2c(O1)c(C)cc1c2[nH]c2c1cccc2)C	C23H25NO	331.45	25	13	0.3	3	1	1	108.45	25.02	3.8	6.63	6.43	4.66	6.51	5.6	-6.26	0.000183	5.51e-07	Poorly soluble	-6.96	3.66e-05	1.11e-07	Poorly soluble	-7.47	1.12e-05	3.38e-08	Poorly soluble	High	No	Yes	Yes	Yes	Yes	Yes	Yes	-3.61	1	1	0	1	1	0.55	0	1	1	4.07
Limocitrin 3,5,7,4'-tetramethyl ether	CC(=CCC[C@H]1C=Cc2c(O1)c(C)cc1c2[nH]c2c1ccc(c2)O)C	C22H23NO2	333.42	25	13	0.27	3	2	2	105.63	45.25	3.27	6.08	5.75	3.83	5.52	4.89	-5.92	0.000397	1.19e-06	Moderately soluble	-6.81	5.16e-05	1.55e-07	Poorly soluble	-6.29	0.000172	5.15e-07	Poorly soluble	High	Yes	No	Yes	Yes	Yes	Yes	Yes	-4.02	0	1	0	0	1	0.55	0	1	1	3.99
Linamarin	CCOC(=O)CCC(=O)O	C6H10O4	146.14	10	0	0.67	5	4	1	34.01	63.6	1.17	0.51	0.41	0.25	0.23	0.51	-0.74	26.8	0.183	Very soluble	-1.42	5.61	0.0384	Very soluble	-0.52	43.8	0.3	Soluble	High	No	No	No	No	No	No	No	-6.83	0	2	0	0	1	0.85	0	0	1	1.78
Longimicins A	COc1c(O)cc2c(c1CC=C(C)C)c(=O)c1c(o2)cc2c(c1O)[C@@H](O)[C@H](O2)C(O)(C)C	C24H26O8	442.46	32	14	0.38	4	8	4	120.37	129.59	3.43	4.15	3.12	0.68	3.82	3.04	-5.26	0.00245	5.53e-06	Moderately soluble	-6.58	0.000117	2.64e-07	Poorly soluble	-4.92	0.00531	1.2e-05	Moderately soluble	High	No	No	No	No	Yes	No	No	-6.05	0	0	0	0	0	0.55	0	2	2	4.89
Longimicins B	CC(=CCc1c(O)cc2c(c1O)c(=O)c1c(o2)cc(c2c1CCC(O2)(C)C)O)C	C23H24O6	396.43	29	14	0.35	2	6	3	113.58	100.13	3.91	5.36	4.68	2.05	5.03	4.2	-5.9	0.000499	1.26e-06	Moderately soluble	-7.22	2.41e-05	6.08e-08	Poorly soluble	-6.09	0.000322	8.13e-07	Poorly soluble	High	No	No	No	Yes	Yes	No	No	-4.91	0	0	0	0	1	0.55	0	2	2	3.84
Longimicins C	COc1c(O)cc2c(c1C[C@H](C(O)(C)C)O)c(=O)c1c(o2)cc(c(c1O)CC=C(C)C)O	C24H28O8	444.47	32	14	0.38	6	8	5	122.83	140.59	3.73	3.92	3.25	0.68	4.17	3.15	-4.99	0.00452	1.02e-05	Moderately soluble	-6.57	0.000119	2.68e-07	Poorly soluble	-4.97	0.0048	1.08e-05	Moderately soluble	Low	No	No	No	No	No	Yes	No	-6.23	0	0	1	1	0	0.55	0	2	2	4.55
Longimicins D	C/C(=C\Cc1c(O)cc2c(c1O)c(=O)c1c(o2)c(O)ccc1)/CCC=C(C)C	C23H24O5	380.43	28	14	0.26	5	5	3	113.34	90.9	3.87	6.23	5.3	2.52	5.3	4.64	-6.16	0.000261	6.86e-07	Poorly soluble	-7.92	4.52e-06	1.19e-08	Poorly soluble	-6.06	0.000334	8.79e-07	Poorly soluble	High	No	No	No	No	Yes	No	No	-4.2	0	0	0	0	1	0.55	0	2	2	3.67
Lupeol	Cc1cc(=O)[nH]c2c1C(=O)c1ccccc1C2=O	C14H9NO3	239.23	18	12	0.07	0	3	1	65.34	67	1.67	1	1.46	0.87	3.61	1.72	-2.45	0.856	0.00358	Soluble	-2	2.41	0.0101	Very soluble	-5.17	0.00161	6.73e-06	Moderately soluble	High	Yes	No	Yes	No	No	No	No	-7.05	0	0	0	0	0	0.55	1	0	1	2.38
Lupinifolin	COc1c(C)c2C(=O)c3ccccc3C(=O)c2n(c1=O)C	C16H13NO4	283.28	21	12	0.19	1	4	0	76.73	65.37	2.35	1.36	1.48	0.81	3.09	1.82	-2.81	0.439	0.00155	Soluble	-2.34	1.31	0.00462	Soluble	-4.85	0.00399	1.41e-05	Moderately soluble	High	Yes	No	Yes	No	No	No	Yes	-7.06	0	0	0	0	0	0.55	1	0	0	2.8
Luxenchalcone	OCc1c2C(=O)c3ccccc3C(=O)c2n(c(=O)c1OC)C	C16H13NO5	299.28	22	12	0.19	2	5	1	77.89	85.6	1.94	0.11	0.51	0	2.48	1.01	-2.04	2.75	0.00919	Soluble	-1.46	10.3	0.0344	Very soluble	-4.29	0.0155	5.16e-05	Moderately soluble	High	No	No	Yes	No	No	No	No	-8.05	0	0	0	0	0	0.55	1	0	0	2.89
Machilin A	COc1c(=O)[nH]c2c(c1C)C(=O)c1c(C2=O)cccc1O	C15H11NO5	285.25	21	12	0.13	1	5	2	73.85	96.46	1.89	1.37	1.17	0.02	3.15	1.52	-2.83	0.423	0.00148	Soluble	-3	0.286	0.001	Soluble	-4.71	0.00551	1.93e-05	Moderately soluble	High	No	No	Yes	No	No	No	Yes	-7.07	0	0	0	0	0	0.55	1	0	0	2.75
Machilin F	O[C@@H]1C[C@@]2(C)[C@H](C([C@H]1O)(C)C)CC[C@@]1([C@@H]2CC=C2[C@@]1(C)CC[C@@]1([C@H]2CC(C)(C)CC1)C(=O)O)C	C30H48O4	472.7	34	0	0.9	1	4	3	137.82	77.76	3.38	6.51	6.2	4.97	4.96	5.2	-6.81	7.39e-05	1.56e-07	Poorly soluble	-7.94	5.43e-06	1.15e-08	Poorly soluble	-5.3	0.00237	5.02e-06	Moderately soluble	High	No	Yes	No	No	No	No	No	-4.56	1	3	0	1	1	0.56	0	1	2	6.22
Machilin G	CC(=O)O[C@H]1C[C@H]2C(C)(C)[C@@H](OC(=O)c3ccccc3)C[C@H]([C@@]2([C@@H]2[C@@]1(C)C1=CC[C@@H]([C@]1(CC2)C)[C@@H]1C[C@@H](O[C@H]1O)[C@H](C(O)(C)C)O)C)OC(=O)C	C41H58O10	710.89	51	6	0.73	10	10	3	191.45	148.82	4.33	6.23	5.76	4.03	4.99	5.07	-7.6	1.79e-05	2.51e-08	Poorly soluble	-9.14	5.13e-07	7.22e-10	Poorly soluble	-6.06	0.000623	8.77e-07	Poorly soluble	Low	No	Yes	No	No	No	No	Yes	-6.21	1	4	1	1	2	0.55	0	2	3	7.68
Macranthoside B	CC(=O)O[C@@H]1C[C@@H]2[C@]([C@@H]3[C@]1(C)C1=CC[C@H]([C@@]1(CC3)C)[C@@H]1COC([C@H]([C@@H](C1)O)O)(C)C)(C)[C@@H](OC(=O)C)C[C@H](C2(C)C)OC(=O)c1ccccc1	C41H58O9	694.89	50	6	0.73	8	9	2	190.29	128.59	4.43	6.75	6.44	4.39	5.54	5.51	-7.96	7.59e-06	1.09e-08	Poorly soluble	-9.26	3.85e-07	5.55e-10	Poorly soluble	-7.11	5.44e-05	7.83e-08	Poorly soluble	Low	No	Yes	No	No	No	No	Yes	-5.75	2	4	0	1	2	0.17	0	2	3	7.49
Mahanimbicine	O=C1OC[C@@H](C1)[C@@H]1CC=C2[C@@]1(C)CC[C@H]1[C@@]2(C)[C@H](OC(=O)C)C[C@@H]2[C@]1(C)[C@@H](OC(=O)C)C[C@H](C2(C)C)OC(=O)c1ccccc1	C37H48O8	620.77	45	6	0.68	8	8	0	168.9	105.2	4.06	6.98	6.46	5.22	5.88	5.72	-7.66	1.37e-05	2.2e-08	Poorly soluble	-9	6.16e-07	9.92e-10	Poorly soluble	-7.39	2.53e-05	4.07e-08	Poorly soluble	Low	No	Yes	No	No	Yes	No	Yes	-5.13	2	4	0	1	2	0.17	0	2	3	6.61
Mahanimbine	CC(=O)O[C@@H]1C[C@H](OC(=O)c2ccccc2)[C@]2([C@@H]3[C@]1(C)CO[C@@H]3[C@H]([C@@]1([C@@H]2CC[C@@]2(C1=CC[C@H]2c1cocc1)C)C)O)C	C35H42O7	574.7	42	11	0.6	6	7	1	156.48	95.2	3.64	5.91	6.08	3.99	5.09	4.94	-6.92	6.84e-05	1.19e-07	Poorly soluble	-7.68	1.19e-05	2.07e-08	Poorly soluble	-7.42	2.2e-05	3.82e-08	Poorly soluble	Low	No	Yes	No	No	No	No	No	-5.61	1	4	0	1	1	0.55	0	2	2	6.63
Mahanine	C[C@H]1CC[C@@H](C(=O)C1)C(C)C	C10H18O	154.25	11	0	0.9	1	1	0	48.27	17.07	2.4	3.05	2.65	2.3	2.64	2.61	-2.65	0.344	0.00223	Soluble	-3.07	0.13	0.000842	Soluble	-2.17	1.05	0.00678	Soluble	High	Yes	No	No	No	No	No	No	-5.08	0	1	0	0	2	0.55	0	0	1	2.42
Maleic acid monoethyl ester	COc1cc(ccc1O)C[C@H]([C@H](Cc1ccc(c(c1)OC)O)C)C	C20H26O4	330.42	24	12	0.4	7	4	2	96.96	58.92	3.6	4.96	4.17	3.2	4.54	4.09	-4.92	0.00396	1.2e-05	Moderately soluble	-5.94	0.000383	1.16e-06	Moderately soluble	-5.67	0.0007	2.12e-06	Moderately soluble	High	Yes	Yes	Yes	Yes	No	Yes	Yes	-4.79	0	0	0	0	0	0.55	0	0	1	3.05
Mangostenone C	COc1cc(ccc1OC)C[C@@H]([C@H](Cc1ccc(c(c1)OC)O)C)C	C21H28O4	344.44	25	12	0.43	8	4	1	101.43	47.92	3.91	5.28	4.48	3.42	5.09	4.44	-5.13	0.00256	7.43e-06	Moderately soluble	-6.04	0.000317	9.19e-07	Poorly soluble	-6.37	0.000148	4.29e-07	Poorly soluble	High	Yes	Yes	No	No	No	Yes	Yes	-4.65	0	0	0	0	1	0.55	0	0	2	3.21
Mangostenone D	COC(=O)c1cc(O)c(c(c1)O)O	C8H8O5	184.15	13	6	0.12	2	5	3	43.79	86.99	0.97	0.86	0.59	0.18	0.28	0.57	-1.73	3.41	0.0185	Very soluble	-2.27	0.988	0.00537	Soluble	-0.75	32.8	0.178	Soluble	High	No	No	No	No	No	No	No	-6.81	0	0	0	0	1	0.55	1	1	1	1.5
Mangostenone E	COC(=O)[C@H](C(=C)CC[C@H]([C@H]1CC[C@@H]2[C@]1(C)CC(=O)C1=C2C(=O)C[C@@H]2[C@]1(C)CCC(=O)[C@H]2C)C)C	C30H42O5	482.65	35	0	0.73	7	5	0	138.29	77.51	4.17	5.61	5.66	3.79	6.67	5.18	-5.9	0.000601	1.25e-06	Moderately soluble	-7	4.82e-05	9.99e-08	Poorly soluble	-6.49	0.000155	3.21e-07	Poorly soluble	High	No	Yes	No	No	Yes	No	No	-5.26	0	4	0	0	1	0.55	0	1	2	5.97
Mangostinone	COC(=O)c1c2C=CC(Oc2c2c(c1O)cccc2)(C)C	C17H16O4	284.31	21	10	0.24	2	4	1	81.37	55.76	2.87	4.14	3.41	2.54	3.31	3.25	-4.43	0.0105	3.7e-05	Moderately soluble	-5.02	0.00273	9.59e-06	Moderately soluble	-4.44	0.0104	3.66e-05	Moderately soluble	High	Yes	No	Yes	Yes	Yes	No	No	-5.09	0	0	0	0	0	0.55	0	0	1	3.41
Marcanines A	CC(=CCc1c(oc2c(c1=O)c(O)cc1c2C=CC(O1)(C)C)c1ccc(cc1O)O)C	C25H24O6	420.45	31	16	0.24	3	6	3	121.83	100.13	3.77	5.52	5.16	2.09	5.18	4.35	-6.11	0.000328	7.79e-07	Poorly soluble	-7.38	1.74e-05	4.15e-08	Poorly soluble	-6.44	0.000152	3.61e-07	Poorly soluble	High	No	No	No	Yes	Yes	No	No	-4.95	0	0	0	0	1	0.55	0	1	2	4.43
Marcanines B	CCCCCCCCCCCC[C@@H]([C@H]1CC[C@@H](O1)[C@@H](CCCCCC(=O)CCCC[C@H](CC1=C[C@@H](OC1=O)C)O)O)O	C35H62O7	594.86	42	0	0.89	26	7	3	171.71	113.29	6.94	7.91	7.27	3.36	9.2	6.94	-6.8	9.53e-05	1.6e-07	Poorly soluble	-10.14	4.32e-08	7.27e-11	Insoluble	-7.88	7.91e-06	1.33e-08	Poorly soluble	Low	No	Yes	No	No	No	No	Yes	-4.31	1	4	1	1	2	0.55	0	0	3	7.18
Marcanines C	CCCCCCCCCCCC[C@@H]([C@@H]1CC[C@@H](O1)[C@@H](CCCCCC(=O)CCCC[C@H](CC1=C[C@@H](OC1=O)C)O)O)O	C35H62O7	594.86	42	0	0.89	26	7	3	171.71	113.29	6.65	7.91	7.27	3.36	9.2	6.88	-6.8	9.53e-05	1.6e-07	Poorly soluble	-10.14	4.32e-08	7.27e-11	Insoluble	-7.88	7.91e-06	1.33e-08	Poorly soluble	Low	No	Yes	No	No	No	No	Yes	-4.31	1	4	1	1	2	0.55	0	0	3	7.18
Marcanines D	CCCCCCCCCCC=CCC[C@H]([C@H]1CC[C@@H](O1)[C@@H](CCCCCC(=O)CCCC[C@@H]1C[C@H](C(=O)O1)CC(=O)C)O)O	C37H64O7	620.9	44	0	0.86	27	7	2	180.36	110.13	6.35	7.91	8.11	3.63	10.22	7.24	-6.89	7.98e-05	1.29e-07	Poorly soluble	-10.07	5.26e-08	8.47e-11	Insoluble	-8.42	2.34e-06	3.77e-09	Poorly soluble	Low	No	Yes	No	No	No	No	No	-4.47	1	4	1	1	3	0.55	0	1	3	6.97
Maslinic acid	CCCCCCCCCCCC[C@H]([C@@H]1CC[C@@H](O1)[C@@H](CC[C@@H](CCC[C@H](CCC[C@H](CC1=C[C@H](OC1=O)C)O)O)O)O)O	C35H64O8	612.88	43	0	0.91	26	8	5	173.84	136.68	5.85	7.26	6.03	2.67	8.12	5.99	-6.5	0.000195	3.18e-07	Poorly soluble	-9.96	6.8e-08	1.11e-10	Poorly soluble	-6.45	0.000219	3.58e-07	Poorly soluble	Low	No	No	No	No	No	No	Yes	-4.88	1	4	1	2	3	0.55	0	0	3	7.48
Mefiavolkenin	CCCCCCCCCCCC[C@@H]([C@@H](CC[C@@H]([C@@H]1CC[C@H](O1)CCCCCCC[C@H](CC1=C[C@@H](OC1=O)C)O)O)O)O	C35H64O7	596.88	42	0	0.91	26	7	4	172.67	116.45	7.08	8.78	7.06	3.46	8.88	7.05	-7.36	2.63e-05	4.41e-08	Poorly soluble	-11.11	4.66e-09	7.8e-12	Insoluble	-7.4	2.39e-05	4e-08	Poorly soluble	Low	No	No	No	No	No	No	Yes	-3.71	1	4	1	1	2	0.55	0	0	3	7.34
Melianin B	CCCCCCCCCCCC[C@H]([C@H](CC[C@@H]([C@@H]1CC[C@H](O1)C[C@H](C[C@H](CCC[C@H](CC1=C[C@@H](OC1=O)C)O)O)O)O)O)O	C35H64O9	628.88	44	0	0.91	26	9	6	175	156.91	6.14	6.28	5	1.89	7.37	5.34	-5.98	0.000659	1.05e-06	Moderately soluble	-9.36	2.73e-07	4.33e-10	Poorly soluble	-5.49	0.00202	3.21e-06	Moderately soluble	Low	No	No	No	No	No	No	No	-5.68	2	3	2	1	5	0.17	0	0	3	7.61
Melianin C	CCCCCCCCCCCC[C@H]([C@H](CC[C@@H]([C@@H]1CC[C@H](O1)CCC[C@H]([C@@H](CC[C@H](CC1=C[C@@H](OC1=O)C)O)O)O)O)O)O	C35H64O9	628.88	44	0	0.91	26	9	6	175	156.91	6.25	6.28	5	1.89	7.37	5.36	-5.98	0.000659	1.05e-06	Moderately soluble	-9.36	2.73e-07	4.33e-10	Poorly soluble	-5.49	0.00202	3.21e-06	Moderately soluble	Low	No	No	No	No	No	No	No	-5.68	2	3	2	1	5	0.17	0	0	3	7.57
Meliavolkinin	C=CC(=C)CCC=C(C)C	C10H16	136.23	10	0	0.4	4	0	0	48.76	0	2.89	4.17	3.48	3.56	3.05	3.43	-3.05	0.122	0.000896	Soluble	-3.88	0.018	0.000132	Soluble	-2.42	0.524	0.00385	Soluble	Low	Yes	No	No	No	No	No	No	-4.17	0	1	0	0	2	0.55	0	2	2	2.85
Menthone	CCCCCCCC[C@H]1CCC[C@@]1(CCCCCNN)C(=O)O	C19H38N2O2	326.52	23	0	0.95	14	4	3	98.35	75.35	3.51	3.54	4.63	3.6	4.28	3.91	-3.17	0.22	0.000675	Soluble	-4.81	0.00509	1.56e-05	Moderately soluble	-5.31	0.00159	4.86e-06	Moderately soluble	High	No	No	No	No	No	Yes	No	-5.78	0	0	1	0	0	0.56	0	1	2	3.65
Meso-dihydroguaiaretic acid	Oc1cc(O)c2c(c1)oc(c(c2=O)O[C@@H]1O[C@H](C)[C@H]([C@@H]([C@H]1O)O)O)c1cc(O)c(c(c1)O)O	C21H20O12	464.38	33	16	0.29	3	12	8	111.02	210.51	1.45	0.51	0.19	-2.32	-0.46	-0.13	-3.2	0.292	0.000629	Soluble	-4.5	0.0146	3.15e-05	Moderately soluble	-1.49	14.9	0.0321	Soluble	Low	No	No	No	No	No	No	No	-8.77	2	0	1	1	3	0.17	1	1	1	5.32
Meso-monomethyl dihydroguaiaretic acid	Oc1cc(O)c2c(c1)oc(c(c2=O)O[C@@H]1O[C@H](C(=O)O)[C@H]([C@@H]([C@H]1O)O)O)c1cc(O)c(c(c1)O)O	C21H18O14	494.36	35	16	0.24	4	14	9	112.79	247.81	1.17	0.25	-0.74	-3.08	-1.51	-0.78	-3.14	0.361	0.00073	Soluble	-5.01	0.00478	9.67e-06	Moderately soluble	-0.45	176	0.356	Soluble	Low	No	Yes	No	No	No	No	No	-9.14	2	2	1	1	3	0.11	1	1	1	5.3
Methyl gallate	CCCCCCC[C@@H](CCC(=O)N1CCCC[C@@H]1c1cccnc1)O	C21H34N2O2	346.51	25	6	0.71	11	3	1	107.37	53.43	3.86	4.12	3.93	2.53	4.58	3.81	-4.04	0.0319	9.21e-05	Moderately soluble	-4.95	0.0039	1.13e-05	Moderately soluble	-5.53	0.00102	2.96e-06	Moderately soluble	High	Yes	No	No	No	No	Yes	No	-5.49	0	0	1	0	0	0.55	0	0	2	3.58
Methyl zhankuic acid A	CC(=CCNc1ncnc2c1[nH]cn2)C	C10H13N5	203.24	15	9	0.3	3	3	2	59.74	66.49	1.39	2.07	1.54	0.78	1.63	1.48	-2.65	0.455	0.00224	Soluble	-3.1	0.163	0.000803	Soluble	-3.49	0.0653	0.000321	Soluble	High	Yes	No	Yes	No	No	No	No	-6.07	0	0	0	0	0	0.55	0	1	1	2.5
Mollugin	OC[C@H]1O[C@@H]([C@H]([C@@H]1O)O)n1cnc2c1ncnc2NCC=C(C)C	C15H21N5O4	335.36	24	9	0.53	5	7	4	86.33	125.55	2.3	1.11	-0.7	-1.03	-0.85	0.17	-2.57	0.911	0.00272	Soluble	-3.34	0.153	0.000458	Soluble	-1.24	19.3	0.0575	Soluble	High	No	Yes	No	No	No	No	No	-7.56	0	1	0	0	0	0.55	0	1	0	4.47
Morusin	O=c1cc(oc2c1c1ccccc1cc2)c1ccccc1	C19H12O2	272.3	21	20	0	1	2	0	85.43	30.21	2.91	4.43	4.61	3.06	5.03	4.01	-4.96	0.003	1.1e-05	Moderately soluble	-4.78	0.00449	1.65e-05	Moderately soluble	-7.8	4.29e-06	1.57e-08	Poorly soluble	High	Yes	No	Yes	Yes	No	No	No	-4.82	0	0	0	0	0	0.55	0	1	1	3.08
Mosin B	Oc1ccc(cc1)[C@H]1CC(=O)c2c(O1)cc(cc2O)O	C15H12O5	272.25	20	12	0.13	1	5	3	71.57	86.99	1.74	2.52	2.19	0.71	2.05	1.84	-3.49	0.0874	0.000321	Soluble	-3.99	0.0277	0.000102	Soluble	-3.42	0.104	0.000382	Soluble	High	No	Yes	Yes	No	No	No	Yes	-6.17	0	0	0	0	0	0.55	0	0	0	3.01
Mosin C	COc1cc(ccc1OC)[C@@H]1O[C@@H]([C@H]([C@H]1C)C)c1ccc(c(c1)OC)O	C21H26O5	358.43	26	12	0.43	5	5	1	100.4	57.15	3.5	4.06	3.85	2.2	3.73	3.47	-4.63	0.00837	2.34e-05	Moderately soluble	-4.96	0.00389	1.09e-05	Moderately soluble	-5.38	0.0015	4.18e-06	Moderately soluble	High	Yes	No	No	Yes	No	Yes	No	-5.6	0	0	0	0	0	0.55	0	0	2	4
Mosinone A	COc1cc(ccc1O)[C@@H]1O[C@@H]([C@H]([C@H]1C)C)c1ccc(c(c1)OC)O	C20H24O5	344.4	25	12	0.4	4	5	2	95.93	68.15	3.25	3.73	3.55	1.98	3.19	3.14	-4.42	0.0132	3.83e-05	Moderately soluble	-4.85	0.00483	1.4e-05	Moderately soluble	-4.69	0.0071	2.06e-05	Moderately soluble	High	Yes	Yes	No	Yes	No	Yes	No	-5.75	0	0	0	0	0	0.55	0	0	1	3.88
Muricapentocin	Cc1cccc2c1ccc1c2oc(=O)c2c1occ2C	C17H12O3	264.28	20	17	0.12	0	3	0	79.69	43.35	2.97	4.12	4.31	3.13	4.87	3.88	-4.7	0.00524	1.98e-05	Moderately soluble	-4.74	0.00484	1.83e-05	Moderately soluble	-6.95	2.94e-05	1.11e-07	Poorly soluble	High	Yes	No	Yes	Yes	No	No	No	-4.99	0	0	0	0	0	0.55	0	2	1	3.35
Muricatetrocin C	CO[C@@H]1[C@@H](O)[C@H](O[C@H]2CC[C@]3([C@@H](C2)CC[C@@H]2[C@@H]3CC[C@]3([C@]2(O)C[C@@H]([C@@H]3C2=CC(=O)OC2)OC(=O)C)C)C)O[C@@H]([C@H]1O)C	C32H48O10	592.72	42	0	0.88	6	10	3	151.61	140.98	4.41	1.96	2.65	1.69	2.09	2.56	-4.35	0.0263	4.43e-05	Moderately soluble	-4.55	0.0169	2.85e-05	Moderately soluble	-2.73	1.1	0.00185	Soluble	Low	No	Yes	No	No	No	No	No	-8.52	1	3	1	1	0	0.55	0	2	1	7.34
Muricoreacin	COC(=O)C[C@H]1[C@]2(C)[C@H](O[C@H]3C2=C(C)[C@@H](C3)c2cocc2)[C@@H]2[C@H]3[C@]1(C)C(=O)C=C[C@@]3(C)C(=O)O2	C27H30O7	466.52	34	5	0.59	4	7	0	120.98	92.04	3.3	2.17	3.74	2.28	3.83	3.06	-3.94	0.053	0.000114	Soluble	-3.74	0.0857	0.000184	Soluble	-5.27	0.00249	5.35e-06	Moderately soluble	High	No	Yes	No	No	No	No	No	-7.61	0	0	0	0	0	0.55	0	2	1	6.07
Murihexocin C	CCCCCCCC(=O)N1CCC[C@H]1c1cccnc1	C17H26N2O	274.4	20	6	0.65	8	2	0	86.98	33.2	3.19	3.66	3.4	2.46	3.9	3.32	-3.54	0.0789	0.000288	Soluble	-4.05	0.0247	8.99e-05	Moderately soluble	-5	0.00273	9.93e-06	Moderately soluble	High	Yes	No	No	No	No	Yes	No	-5.38	0	0	0	0	0	0.55	0	0	2	2.77
Myrcene	COc1cc(ccc1OC)c1cc(=O)c2c(o1)c(OC)c(c(c2OC)OC)OC	C21H22O8	402.39	29	16	0.29	7	8	0	106.87	85.59	3.96	3.01	3.51	0.34	4.28	3.02	-4.18	0.0267	6.65e-05	Moderately soluble	-4.47	0.0136	3.37e-05	Moderately soluble	-6.82	6.16e-05	1.53e-07	Poorly soluble	High	No	No	No	No	Yes	No	Yes	-6.62	0	0	0	0	0	0.55	0	0	1	3.9
Myricetin	COc1ccc2c(c1OC)C(=O)O[C@@H]2[C@@H]1N(C)CCc2c1c(OC)c1c(c2)OCO1	C22H23NO7	413.42	30	12	0.41	4	8	0	109.88	75.69	3.59	2.71	1.85	1.69	3.2	2.61	-4.14	0.0298	7.2e-05	Moderately soluble	-3.95	0.0461	0.000111	Soluble	-5.23	0.00241	5.83e-06	Moderately soluble	High	No	No	No	Yes	Yes	Yes	Yes	-6.9	0	0	0	0	0	0.55	0	0	1	4.31
Myricetin 3-O-alpha-rhamnoside	CO[C@@H]1C[C@H](O[C@H]2CC[C@]3([C@H](C2)CC[C@@H]2[C@@H]3CC[C@]3([C@@]2(O)CC[C@@H]3C2=CC(=O)OC2)C)C)O[C@@H]([C@H]1O)C	C30H46O7	518.68	37	0	0.9	4	7	2	139.55	94.45	4.47	3.05	4.14	2.94	3.35	3.59	-4.71	0.01	1.93e-05	Moderately soluble	-4.7	0.0104	2e-05	Moderately soluble	-3.78	0.0853	0.000164	Soluble	High	No	Yes	No	No	No	No	No	-7.3	1	3	0	0	0	0.55	0	1	1	6.87
Myricetin 3-O-beta-glucuronide	CO[C@@H]1[C@@H](O)[C@H](O[C@H]2CC[C@]3([C@@H](C2)CC[C@@H]2[C@@H]3CC[C@]3([C@]2(O)CC[C@@H]3C2=CC(=O)OC2)C)C)O[C@@H]([C@@H]1O)C	C30H46O8	534.68	38	0	0.9	4	8	3	140.71	114.68	3.64	2.1	3.11	2.15	2.46	2.69	-4.21	0.0327	6.11e-05	Moderately soluble	-4.14	0.0389	7.27e-05	Moderately soluble	-2.96	0.586	0.0011	Soluble	High	No	Yes	No	No	No	No	No	-8.07	1	3	0	0	0	0.55	0	1	1	6.97
N-(4-hydroxyundecanoyl)anabasine	O[C@@H]1C[C@@]2(C)[C@H](C([C@H]1O)(C)C)CC[C@@]1([C@H]2CC=C2[C@@]1(C)CC[C@@]1([C@@H]2CC(C)(C)CC1)C)C	C30H50O2	442.72	32	0	0.93	0	2	2	136.04	40.46	4.58	8.18	7.14	6	6.02	6.38	-7.74	8.09e-06	1.83e-08	Poorly soluble	-8.89	5.71e-07	1.29e-09	Poorly soluble	-6.34	0.000201	4.53e-07	Poorly soluble	Low	No	No	No	No	No	No	No	-3.19	1	3	0	1	1	0.55	0	1	2	6.2
N6-isopentenyladenine	OC[C@@]1(C)[C@H](O)CC[C@@]2([C@@H]1CC[C@]1([C@H]2CC=C2[C@]1(C)CC[C@]1([C@H]2CC(CC1)(C)C)C)C)C	C30H50O2	442.72	32	0	0.93	1	2	2	136.04	40.46	4.36	8.48	7.14	6	6.31	6.46	-7.86	6.09e-06	1.38e-08	Poorly soluble	-9.2	2.79e-07	6.3e-10	Poorly soluble	-6.59	0.000113	2.56e-07	Poorly soluble	Low	No	No	No	No	No	No	No	-2.98	1	3	0	1	1	0.55	0	1	2	6.23
N6-isopentenyladenosine	O[C@H]1CC[C@]2([C@H](C1(C)C)CC[C@@]1([C@H]2CC=C2[C@@]1(C)CC[C@@]1([C@@H]2CC(C)(C)CC1)C)C)C	C30H50O	426.72	31	0	0.93	0	1	1	134.88	20.23	4.79	9.15	8.17	6.92	6.92	7.19	-8.25	2.4e-06	5.62e-09	Poorly soluble	-9.47	1.44e-07	3.38e-10	Poorly soluble	-7.16	2.93e-05	6.85e-08	Poorly soluble	Low	No	No	No	No	No	No	No	-2.41	1	3	0	1	2	0.55	0	1	2	6.04
Naphthoflavon	CO[C@H]1C[C@H](OC[C@H]2CC[C@]3([C@@H](C2)CC[C@@H]2[C@@H]3CC[C@]3([C@]2(O)C[C@@H]([C@@H]3C2=CC(=O)OC2)OC(=O)C)C)C)O[C@@H]([C@@H]1C)C	C34H52O8	588.77	42	0	0.88	7	8	1	158.9	100.52	4.66	4.13	5.2	3.61	4.4	4.4	-5.63	0.00138	2.34e-06	Moderately soluble	-5.95	0.000664	1.13e-06	Moderately soluble	-4.91	0.00724	1.23e-05	Moderately soluble	High	No	Yes	No	No	No	No	No	-6.96	1	3	0	0	0	0.55	0	1	2	7.46
Naringenin	CO[C@H]1C[C@H](O[C@H]2CC[C@]3([C@H](C2)CC[C@H]2[C@@H]3CC[C@]3([C@]2(O)C[C@@H]([C@@H]3C2=CC(=O)OC2)OC(=O)C)C)C)O[C@H]([C@@H]1O)C	C32H48O9	576.72	41	0	0.88	6	9	2	150.45	120.75	4.32	1.16	3.68	2.46	2.97	2.92	-3.75	0.102	0.000178	Soluble	-3.29	0.295	0.000512	Soluble	-3.56	0.159	0.000276	Soluble	High	No	Yes	No	No	No	No	No	-8.99	1	3	0	0	0	0.55	0	2	1	7.25
Nectandrin A	O[C@H]1CC[C@]2([C@H](C1(C)C)CC[C@@]1([C@@H]2CC=C2[C@@]1(C)CC[C@@]1([C@H]2CC(C)(C)CC1)C(=O)O)C)C	C30H48O3	456.7	33	0	0.9	1	3	2	136.65	57.53	3.94	7.49	7.23	5.82	5.85	6.07	-7.32	2.16e-05	4.74e-08	Poorly soluble	-8.53	1.34e-06	2.94e-09	Poorly soluble	-6.12	0.000345	7.55e-07	Poorly soluble	Low	No	No	No	No	No	No	No	-3.77	1	3	0	1	1	0.85	0	1	2	6.08
Nectandrin B	COc1cc2oc(c3ccc(cc3O)O)c(c(=O)c2c(c1/C=C/C(C)C)O)CC=C(C)C	C26H28O6	436.5	32	16	0.27	6	6	3	128.71	100.13	4.14	5.72	5.65	2.3	6.08	4.78	-6.12	0.000328	7.52e-07	Poorly soluble	-7.59	1.12e-05	2.57e-08	Poorly soluble	-6.6	0.000109	2.5e-07	Poorly soluble	High	No	No	No	Yes	No	No	No	-4.9	0	1	0	0	1	0.55	0	1	2	4.43
Neo-tanshinlactone	CC(=O)O[C@H]1C(=O)[C@]2(C)[C@@H](O)C[C@@H]3[C@]([C@H]2[C@@H]([C@]2(C(C1=C(C)[C@@H](OC(=O)[C@@H]([C@H](c1ccccc1)NC(=O)c1ccccc1)O)C2)(C)C)O)OC(=O)c1ccccc1)(CO3)OC(=O)C	C47H51NO14	853.91	62	18	0.45	15	14	4	218.96	221.29	4.26	3.66	3.41	1.7	4.59	3.52	-6.66	0.000185	2.16e-07	Poorly soluble	-8	8.61e-06	1.01e-08	Poorly soluble	-8.8	1.34e-06	1.57e-09	Poorly soluble	Low	No	Yes	No	No	No	No	No	-8.91	2	3	2	1	3	0.17	0	2	3	8.34
Neritaloside	O=C1C[C@H]2[C@H](O1)[C@@H]1O[C@]1(C)CCC=C(C(=O)C2)C	C14H18O4	250.29	18	0	0.71	0	4	0	65.2	55.9	2.12	1.13	1.77	1.36	2.45	1.77	-2.1	1.97	0.00788	Soluble	-1.9	3.17	0.0127	Very soluble	-2.29	1.27	0.00508	Soluble	High	Yes	No	No	No	No	No	No	-7.02	0	0	0	0	0	0.55	0	1	0	4.49
Nimbolide	CC(=O)O[C@H]1C[C@H](CC=C1C)C(=C)C	C12H18O2	194.27	14	0	0.58	3	2	0	58.02	26.3	2.47	3.69	2.85	2.56	2.48	2.81	-3.17	0.131	0.000674	Soluble	-3.93	0.0227	0.000117	Soluble	-2.14	1.41	0.00728	Soluble	High	Yes	No	No	No	Yes	No	No	-4.87	0	0	0	0	1	0.55	0	1	2	3.63
N-n-octanoylnornicotine	O[C@H]1C[C@@H]2[C@]([C@H]1[C@]([C@@H]1OC(=O)[C@@H]([C@](C1)(C)O)C)(O)C)(C)CC[C@H]1[C@H]2C[C@H]2O[C@]32[C@]1(C)C(=O)C=C[C@@H]3O	C28H40O8	504.61	36	0	0.86	2	8	4	130.36	136.82	3.33	1.86	1.52	1.26	2.01	1.99	-4.01	0.0495	9.81e-05	Moderately soluble	-4.35	0.0223	4.42e-05	Moderately soluble	-2.15	3.59	0.00711	Soluble	High	No	Yes	No	No	No	No	No	-8.06	1	3	0	1	0	0.55	0	1	1	7.05
Nobiletin	O=C1O[C@H](C[C@@]([C@H]1C)(C)O)[C@@]([C@H]1CC[C@@H]2[C@]1(C)CC[C@H]1[C@H]2[C@@H]2O[C@@H]2[C@@]2([C@]1(C)C(=O)C=CC2)O)(O)C	C28H40O7	488.61	35	0	0.86	2	7	3	129.2	116.59	3.23	2.6	2.55	2.04	2.9	2.66	-4.38	0.0206	4.21e-05	Moderately soluble	-4.7	0.0098	2.01e-05	Moderately soluble	-2.97	0.522	0.00107	Soluble	High	No	Yes	No	No	No	No	No	-7.43	0	2	0	0	0	0.55	0	1	1	6.45
Noscapine	Oc1ccc(cc1)C(=O)O	C7H6O3	138.12	10	6	0	1	3	2	35.42	57.53	0.85	1.58	1.09	0.99	0.74	1.05	-2.07	1.18	0.00852	Soluble	-2.4	0.551	0.00399	Soluble	-1.17	9.4	0.0681	Soluble	High	Yes	No	No	No	No	No	No	-6.02	0	3	0	0	1	0.85	0	0	1	1
Odoroside A	OCCC1=C(C)C[C@@H](OC1=O)[C@H]([C@H]1CC[C@@H]2[C@]1(C)CC[C@H]1[C@H]2CC=C2[C@]1(C)[C@@H](O)C[C@@H](C2)O[C@H]1O[C@@H](CO)[C@@H]([C@H]([C@H]1O)O)O)C	C35H54O10	634.8	45	0	0.86	7	10	6	166.63	166.14	4.09	3.04	2.37	1.43	2.23	2.63	-5.23	0.00375	5.9e-06	Moderately soluble	-6.19	0.000405	6.39e-07	Poorly soluble	-2.43	2.38	0.00375	Soluble	Low	No	Yes	No	No	No	No	No	-8.01	2	3	1	1	3	0.17	0	1	1	7.9
Odoroside H	COc1cc(cc(c1OC)OC)[C@H]1[C@H]2C(=O)OC[C@@H]2C(=O)c2c1cc1OCOc1c2	C22H20O8	412.39	30	12	0.36	4	8	0	103.11	89.52	3.14	2.51	2.56	1.35	3.49	2.61	-4.01	0.0403	9.77e-05	Moderately soluble	-4.04	0.038	9.21e-05	Moderately soluble	-5.45	0.00147	3.56e-06	Moderately soluble	High	No	No	No	No	Yes	Yes	Yes	-7.03	0	0	0	0	0	0.55	0	0	1	4.4
Olean-12-en-2-alpha,3-beta-diol	COC(=O)[C@]1(C)CC[C@]2([C@@H](C1)[C@]1(C)CC[C@@]3(C(=CC=C4C3=CC(=O)C(=C4C)O)[C@]1(CC2)C)C)C	C30H40O4	464.64	34	0	0.67	2	4	1	135.61	63.6	4.28	6.27	6.79	4.62	5.94	5.58	-6.54	0.000134	2.89e-07	Poorly soluble	-7.39	1.88e-05	4.04e-08	Poorly soluble	-6.49	0.000149	3.21e-07	Poorly soluble	Low	No	Yes	No	No	Yes	No	No	-4.68	1	3	0	1	1	0.55	0	0	2	6.3
Olean-12-en-3-alpha,24-diol	OC(=O)c1ccc(c(c1)O)O	C7H6O4	154.12	11	6	0	1	4	3	37.45	77.76	0.66	1.15	0.8	0.4	0.26	0.65	-1.86	2.14	0.0139	Very soluble	-2.38	0.646	0.00419	Soluble	-0.6	38.3	0.248	Soluble	High	No	No	No	No	No	No	Yes	-6.42	0	3	0	0	1	0.56	1	1	1	1.07
Olean-12-en-3-beta-ol	CC(=O)C1=c2oc3=C(C)C(=O)C(C(=O)c3c2Oc2c1cccc2)(C)C	C20H16O5	336.34	25	11	0.25	1	5	0	90.63	73.58	2.99	2.25	2.14	1.1	4.71	2.64	-3.6	0.084	0.00025	Soluble	-3.43	0.125	0.000371	Soluble	-6.45	0.000119	3.52e-07	Poorly soluble	High	Yes	No	Yes	Yes	Yes	No	Yes	-6.75	0	0	0	0	0	0.55	0	1	0	4.03
Oleandrigeninsarmentoside	CC1=c2oc3=Cc4c(Oc3c2C(=O)C(C1=O)(C)C)cccc4	C18H14O4	294.3	22	11	0.22	0	4	0	80.81	56.51	2.93	2.85	2.18	1.54	4.3	2.76	-3.83	0.0435	0.000148	Soluble	-3.7	0.0594	0.000202	Soluble	-5.92	0.000354	1.2e-06	Moderately soluble	High	Yes	No	Yes	Yes	Yes	Yes	Yes	-6.07	0	0	0	0	0	0.55	0	1	0	3.85
Oleandrin	OC[C@H]1O[C@H]([C@@H]([C@H]([C@@H]1O)O)O)c1c(O)ccc2c1occ(c2=O)c1ccc(cc1)O	C21H20O9	416.38	30	16	0.29	3	9	6	104.59	160.82	1.77	0.01	0.06	-1.52	0.81	0.23	-2.62	0.989	0.00237	Soluble	-2.94	0.479	0.00115	Soluble	-2.97	0.449	0.00108	Soluble	Low	No	No	No	No	No	No	No	-8.83	1	0	1	1	2	0.55	0	0	1	4.98
Oleanolic acid	COc1cc(OC)c(cc1c1oc2c(OC)c(OC)c(c(c2c(=O)c1OC)OC)OC)OC	C23H26O10	462.45	33	16	0.35	9	10	0	119.86	104.05	4.39	3.16	3.53	-0.24	4.46	3.06	-4.46	0.0159	3.45e-05	Moderately soluble	-5.02	0.00446	9.65e-06	Moderately soluble	-7.01	4.49e-05	9.71e-08	Poorly soluble	High	No	No	No	Yes	Yes	No	No	-6.88	0	0	0	0	0	0.55	0	0	2	4.38
artocarpin	CCCCC[C@@H]([C@@H](CCC[C@@H]([C@H]1CC[C@@H](O1)[C@H]1CC[C@@H](O1)[C@@H](CCCCCCCCCCCCC1=C[C@@H](OC1=O)C)O)O)O)O	C37H66O8	638.92	45	0	0.92	25	8	4	181.26	125.68	7.13	8.36	6.83	3.02	8.47	6.76	-7.42	2.44e-05	3.82e-08	Poorly soluble	-10.87	8.71e-09	1.36e-11	Insoluble	-6.92	7.68e-05	1.2e-07	Poorly soluble	Low	No	No	No	No	No	No	Yes	-4.26	1	4	1	1	3	0.55	0	0	3	7.63
Paclitaxel	CCCCC[C@@H](CCCC[C@@H]([C@H]1CC[C@@H](O1)[C@H]1CC[C@@H](O1)[C@@H](CCCC[C@@H](CCCCCCCC1=C[C@@H](OC1=O)C)O)O)O)O	C37H66O8	638.92	45	0	0.92	25	8	4	181.26	125.68	7.26	7.44	6.83	3.02	8.47	6.61	-6.84	9.27e-05	1.45e-07	Poorly soluble	-9.91	7.84e-08	1.23e-10	Poorly soluble	-6.92	7.68e-05	1.2e-07	Poorly soluble	Low	No	No	No	No	No	No	Yes	-4.91	1	4	1	1	3	0.55	0	0	3	7.63
Parthenolid-9-one	COc1cc(OC)c2c(c1)oc(c(c2=O)OC)c1ccc(c(c1)OC)OC	C20H20O7	372.37	27	16	0.25	6	7	0	100.38	76.36	3.59	3.25	3.5	0.63	4.21	3.04	-4.24	0.0215	5.77e-05	Moderately soluble	-4.53	0.0111	2.97e-05	Moderately soluble	-6.71	7.24e-05	1.95e-07	Poorly soluble	High	Yes	No	No	Yes	Yes	No	Yes	-6.26	0	0	0	0	0	0.55	0	0	1	3.78
P-Cymene	COc1cc(O)c2c(c1)oc(c(c2=O)OC)c1ccc(c(c1)OC)OC	C19H18O7	358.34	26	16	0.21	5	7	1	95.91	87.36	3.58	3.47	3.2	0.4	3.66	2.86	-4.37	0.0152	4.23e-05	Moderately soluble	-4.99	0.0037	1.03e-05	Moderately soluble	-6.02	0.000343	9.57e-07	Poorly soluble	High	No	No	Yes	No	Yes	Yes	Yes	-6.02	0	0	0	0	0	0.55	0	0	1	3.64
Philadelphicalactone C	O[C@@H]1[C@H](O)C[C@](C[C@H]1O)(O)C(=O)O	C7H12O6	192.17	13	0	0.86	1	6	5	40.11	118.22	-0.09	-2.37	-2.32	-2.14	-1.82	-1.75	0.53	648	3.37	Highly soluble	0.43	512	2.66	Highly soluble	2.08	23000	120	Soluble	Low	No	Yes	No	No	No	No	No	-9.15	0	1	0	0	2	0.56	0	0	1	3.34
Philadelphicalactone D	CCCCCCCCCCCCCC1=C(O)C(=O)C=C(C1=O)O	C19H30O4	322.44	23	0	0.68	12	4	2	93.93	74.6	3.88	6.5	5.09	1.68	4.98	4.43	-5.14	0.00232	7.21e-06	Moderately soluble	-7.86	4.42e-06	1.37e-08	Poorly soluble	-5.12	0.00245	7.6e-06	Moderately soluble	High	No	No	No	Yes	Yes	Yes	No	-3.65	0	0	1	0	1	0.85	1	1	2	3.88
P-Hydroxybenzoic acid			0	0	0		0			0	0
Physagulin D	CC(=O)O[C@@H]1[C@H](OC(=O)c2ccccc2)[C@]2(C)[C@@H](OC(=O)C)[C@H](C[C@]([C@]32[C@@H]([C@@H]1C(C)(C)O3)OC(=O)c1ccc(=O)n(c1)C)(C)O)OC(=O)c1ccccc1	C40H43NO13	745.77	54	18	0.45	13	13	1	189.7	182.96	4.1	3.68	3.56	2.84	3.82	3.6	-6.17	0.000503	6.75e-07	Poorly soluble	-7.21	4.58e-05	6.14e-08	Poorly soluble	-7.57	2.01e-05	2.7e-08	Poorly soluble	Low	No	Yes	No	No	No	Yes	Yes	-8.24	2	3	2	1	3	0.17	0	1	3	7.35
Physagulin D(1->6)-beta-D-glucopyranosyl-(1->4)-beta-D-glucopyranoside	CC(=O)O[C@@H]1[C@H](OC(=O)c2ccccc2)[C@]2(C)[C@@H](OC(=O)C)[C@H](C[C@]([C@]32[C@@H]([C@@H]1C(C)(C)O3)OC(=O)c1ccc(=O)n(c1)C)(C)O)OC(=O)c1ccccc1	C40H43NO13	745.77	54	18	0.45	13	13	1	189.7	182.96	4.1	3.68	3.56	2.84	3.82	3.6	-6.17	0.000503	6.75e-07	Poorly soluble	-7.21	4.58e-05	6.14e-08	Poorly soluble	-7.57	2.01e-05	2.7e-08	Poorly soluble	Low	No	Yes	No	No	No	Yes	Yes	-8.24	2	3	2	1	3	0.17	0	1	3	7.35
Podophyllotoxone	CC(=O)O[C@H]1CC[C@]([C@@]23[C@]1(C)[C@@H](OC(=O)c1ccccc1)[C@@H](O)[C@H]([C@H]3O)C(O2)(C)C)(C)O	C24H32O8	448.51	32	6	0.67	5	8	3	114	122.52	2.97	1.43	1.59	1.35	1.91	1.85	-3.33	0.21	0.000467	Soluble	-3.61	0.111	0.000247	Soluble	-3.45	0.158	0.000352	Soluble	High	No	Yes	No	No	No	Yes	Yes	-8.02	0	0	0	0	0	0.55	0	1	1	5.91
Pristimerin	CC(=O)O[C@H]1[C@@H]2[C@@H](O)[C@]3([C@@]([C@H]1OC(=O)c1ccccc1)(C)[C@H](CC[C@]3(C)O)OC(=O)C)OC2(C)C	C26H34O9	490.54	35	6	0.65	7	9	2	123.74	128.59	3.24	2	2.16	1.71	2.43	2.31	-3.81	0.0766	0.000156	Soluble	-4.33	0.0231	4.71e-05	Moderately soluble	-4.06	0.0426	8.69e-05	Moderately soluble	High	No	Yes	No	No	No	Yes	Yes	-7.87	0	1	0	0	0	0.55	0	1	1	6.17
Protocatechuic acid	O=C1[C@H]2CCC(C[C@H]2C2=CC[C@H]3[C@@]([C@@]2([C@H]1O)C)(C)CCC1=C(C)C(=O)C(=C[C@]31C)O)(C)C	C28H38O4	438.6	32	0	0.71	0	4	2	126.81	74.6	3.43	5.14	5.47	3.5	4.75	4.46	-5.8	0.000699	1.59e-06	Moderately soluble	-6.45	0.000155	3.54e-07	Poorly soluble	-5.33	0.00207	4.72e-06	Moderately soluble	High	No	Yes	No	No	Yes	No	No	-5.33	0	0	0	0	1	0.55	0	1	2	5.99
Psorothamnones A	O=C1[C@H]2CCC(C[C@H]2C2=CC[C@H]3[C@@]([C@@]2([C@H]1O)C)(C)CC[C@@H]1[C@]3(C)CC(=O)C(=C1C)O)(C)C	C28H40O4	440.61	32	0	0.79	0	4	2	127.29	74.6	3.22	4.95	5.55	3.58	4.76	4.41	-5.69	0.000899	2.04e-06	Moderately soluble	-6.25	0.000245	5.57e-07	Poorly soluble	-5.34	0.002	4.55e-06	Moderately soluble	High	No	Yes	No	No	No	No	No	-5.47	0	1	0	0	0	0.55	0	1	2	5.93
Psorothamnones B	Oc1ccc(cc1)/C=C/c1cc(O)cc(c1)O	C14H12O3	228.24	17	12	0	2	3	3	67.88	60.69	1.71	3.13	2.76	2.26	2.57	2.48	-3.62	0.0551	0.000241	Soluble	-4.07	0.0193	8.44e-05	Moderately soluble	-3.29	0.118	0.000516	Soluble	High	Yes	No	Yes	No	Yes	No	Yes	-5.47	0	0	0	0	0	0.55	0	1	1	2.02
Puerarin	CN1CC[C@@H]([C@@H](C1)O)c1c(O)cc(c2c1oc(C)cc2=O)O	C16H19NO5	305.33	22	10	0.44	1	6	3	86.36	94.14	2.43	1.36	0.91	-0.08	1.68	1.26	-2.86	0.421	0.00138	Soluble	-2.94	0.351	0.00115	Soluble	-2.91	0.375	0.00123	Soluble	High	No	Yes	No	No	No	No	No	-7.2	0	0	0	0	0	0.55	0	0	0	3.78
Purpuracenin	CCCCCCCCCC[C@@H]([C@@H](CC[C@H]([C@H]1CC[C@H](O1)[C@H]1CC[C@@H](O1)CCCCCCC[C@H](CC1=C[C@@H](OC1=O)C)O)O)O)O	C37H66O8	638.92	45	0	0.92	25	8	4	181.26	125.68	7.2	8.17	6.83	3.02	8.47	6.74	-7.3	3.21e-05	5.03e-08	Poorly soluble	-10.67	1.37e-08	2.15e-11	Insoluble	-6.92	7.68e-05	1.2e-07	Poorly soluble	Low	No	No	No	No	No	No	Yes	-4.4	1	4	1	1	3	0.55	0	0	3	7.76
Purpurediolin	CCCCCCCCCC[C@@H]([C@@H](CC[C@H]([C@H]1CC[C@H](O1)[C@H]1CC[C@@H](O1)CCCCCCC[C@H](CC1=C[C@@H](OC1=O)C)O)O)O)O	C37H66O8	638.92	45	0	0.92	25	8	4	181.26	125.68	7.2	8.17	6.83	3.02	8.47	6.74	-7.3	3.21e-05	5.03e-08	Poorly soluble	-10.67	1.37e-08	2.15e-11	Insoluble	-6.92	7.68e-05	1.2e-07	Poorly soluble	Low	No	No	No	No	No	No	Yes	-4.4	1	4	1	1	3	0.55	0	0	3	7.76
Purpurenin	CCCCCCCCCCCC[C@@H]([C@H]1CC[C@H](O1)[C@@H](CC[C@@H](CCCCCCCCC[C@H](CC1=C[C@@H](OC1=O)C)O)O)O)O	C37H68O7	624.93	44	0	0.92	28	7	4	182.29	116.45	7.19	9.87	7.84	3.81	9.74	7.69	-8.08	5.14e-06	8.23e-09	Poorly soluble	-12.24	3.61e-10	5.77e-13	Insoluble	-8.17	4.23e-06	6.76e-09	Poorly soluble	Low	No	No	No	No	No	No	Yes	-3.1	1	4	1	1	3	0.55	0	0	3	7.62
Quercetin 3,5,7,3',4'-pentamethyl ether	CCCCCCCCCCCC[C@@H]([C@H]1CC[C@H](O1)[C@@H](CC[C@H](CCCCCCCCC[C@H](CC1=C[C@@H](OC1=O)C)O)O)O)O	C37H68O7	624.93	44	0	0.92	28	7	4	182.29	116.45	5.92	9.87	7.84	3.81	9.74	7.44	-8.08	5.14e-06	8.23e-09	Poorly soluble	-12.24	3.61e-10	5.77e-13	Insoluble	-8.17	4.23e-06	6.76e-09	Poorly soluble	Low	No	No	No	No	No	No	No	-3.1	1	4	1	1	3	0.55	0	0	3	7.62
Quercetin 3,7,3',4'-tetramethyl ether	COc1cc(O)c(c(c1)OC)C(=O)[C@@H]([C@@H](C(=O)c1ccc(cc1)OC)c1ccccc1)C(=O)NCCCCNC(=O)c1ccccc1	C37H38N2O8	638.71	47	24	0.24	18	8	3	176.7	140.26	4.37	5.89	5.21	1.86	6.46	4.76	-6.7	0.000127	1.99e-07	Poorly soluble	-8.61	1.57e-06	2.46e-09	Poorly soluble	-11.02	6.16e-09	9.64e-12	Insoluble	Low	No	Yes	No	Yes	Yes	No	No	-6.01	1	3	2	1	3	0.55	0	1	3	4.78
Quinic acid	C1Oc2c(O1)cc(cc2)[C@H]1OC[C@@H]2[C@H]1CO[C@@H]2c1ccc2c(c1)OCO2	C20H18O6	354.35	26	12	0.4	2	6	0	90	55.38	3.35	2.68	2.57	1.98	3.25	2.77	-3.93	0.0412	0.000116	Soluble	-3.5	0.113	0.00032	Soluble	-4.6	0.00898	2.54e-05	Moderately soluble	High	Yes	No	No	Yes	No	Yes	Yes	-6.56	0	0	0	0	0	0.55	0	0	1	4.12
Rapanone	OC[C@H]([C@H]1CO[C@H]([C@@H](O1)Oc1cc2O[C@@]3([C@@](c2c(c1)OC)(O)[C@@H]([C@@H]([C@H]3c1ccccc1)C(=O)OC)O)c1ccc(cc1)OC)OC)O	C34H38O13	654.66	47	18	0.44	11	13	4	161.84	171.83	4.22	1.64	1.36	-0.1	2.45	1.91	-4.49	0.0212	3.24e-05	Moderately soluble	-4.86	0.00901	1.38e-05	Moderately soluble	-5.71	0.00127	1.94e-06	Moderately soluble	Low	No	Yes	No	No	No	No	Yes	-9.13	2	3	2	1	3	0.17	0	0	2	6.6
Reissantins A	OC[C@H]1O[C@@H](OCC2=C(C)C[C@@H](OC2=O)[C@H]([C@H]2CC[C@@H]3[C@]2(C)CC[C@H]2[C@H]3C[C@@H]3[C@]4([C@]2(C)C(=O)C=C[C@@H]4O)O3)C)[C@@H]([C@H]([C@@H]1O)O)O	C34H48O11	632.74	45	0	0.82	6	11	5	159.87	175.51	3.43	1.68	1.18	0.4	1.84	1.7	-4.43	0.0238	3.76e-05	Moderately soluble	-4.98	0.00662	1.05e-05	Moderately soluble	-1.99	6.46	0.0102	Soluble	Low	No	Yes	No	No	No	No	No	-8.97	2	3	1	1	3	0.17	0	1	1	8.12
Reissantins B	CCCCCC[C@H](CCC[C@H]([C@@H]1CC[C@H](O1)[C@H]1CC[C@H](O1)[C@H](CCCCCCCCCCCCC1=C[C@H](OC1=O)C)O)C)C	C39H70O5	618.97	44	0	0.92	25	5	1	187.39	64.99	8.22	13.08	10.41	5.77	11.27	9.75	-10.27	3.34e-08	5.39e-11	Insoluble	-14.49	2.01e-12	3.24e-15	Insoluble	-9.8	9.74e-08	1.57e-10	Poorly soluble	Low	No	Yes	No	No	No	No	Yes	-0.79	2	4	1	1	3	0.17	0	0	3	7.69
Reissantins D	CCCCCC[C@@H](CCC[C@H]([C@H]1CC[C@@H](O1)[C@H]1CC[C@@H](O1)[C@@H](CCCCCCCCCCCCC1=C[C@@H](OC1=O)C)O)O)O	C37H66O7	622.92	44	0	0.92	25	7	3	180.1	105.45	7.45	9.52	7.86	3.81	9.23	7.58	-8.05	5.56e-06	8.92e-09	Poorly soluble	-11.64	1.41e-09	2.27e-12	Insoluble	-7.87	8.35e-06	1.34e-08	Poorly soluble	Low	No	No	No	No	No	No	Yes	-3.34	1	4	1	1	3	0.55	0	0	3	7.51
Reissantins E	CCCCCC[C@H](CCC[C@H](C[C@H]1CC[C@H](O1)[C@H](CC[C@H]([C@H]1CC[C@H](O1)CCCCCCCCCC1=C[C@H](OC1=O)C)O)O)O)O	C38H68O8	652.94	46	0	0.92	26	8	4	186.07	125.68	6.82	8.35	7.22	3.2	8.9	6.9	-7.43	2.41e-05	3.69e-08	Poorly soluble	-10.86	9.11e-09	1.4e-11	Insoluble	-7.3	3.24e-05	4.95e-08	Poorly soluble	Low	No	No	No	No	No	No	Yes	-4.35	1	4	1	1	3	0.55	0	0	3	7.78
Remangilones A	CCCCCC[C@H](CCC[C@@H]([C@H]1CC[C@@H](O1)[C@@H](CC[C@H]([C@H]1CC[C@H](O1)CCCCCCCCCC1=C[C@H](OC1=O)C)O)O)O)O	C37H66O8	638.92	45	0	0.92	25	8	4	181.26	125.68	6.99	7.99	6.83	3.02	8.47	6.66	-7.18	4.17e-05	6.53e-08	Poorly soluble	-10.48	2.11e-08	3.3e-11	Insoluble	-6.92	7.68e-05	1.2e-07	Poorly soluble	Low	No	No	No	No	No	No	Yes	-4.52	1	4	1	1	3	0.55	0	0	3	7.62
Remangilones C	CCCCCCCCCC[C@@H]([C@H]1CC[C@@H](O1)[C@@H](CC[C@@H]([C@@H]1CC[C@@H](O1)CCCCCCCCCC1=C[C@H](OC1=O)C)O)O)O	C37H66O7	622.92	44	0	0.92	25	7	3	180.1	105.45	7.24	9.7	7.86	3.81	9.23	7.57	-8.16	4.28e-06	6.87e-09	Poorly soluble	-11.83	9.19e-10	1.47e-12	Insoluble	-7.87	8.35e-06	1.34e-08	Poorly soluble	Low	No	No	No	No	No	No	Yes	-3.21	1	4	1	1	3	0.55	0	0	3	7.51
Resiniferol 20-(4-hydroxy-3-methoxyphenylacetate) 9,13,14-ortho-phenylacetate	CCCCCCCCCC[C@H]([C@@H]1CC[C@H](O1)[C@@H](CC[C@H]([C@@H]1CC[C@H](O1)CCCCCCCCCC1=C[C@H](OC1=O)C)O)O)O	C37H66O7	622.92	44	0	0.92	25	7	3	180.1	105.45	6.77	9.7	7.86	3.81	9.23	7.47	-8.16	4.28e-06	6.87e-09	Poorly soluble	-11.83	9.19e-10	1.47e-12	Insoluble	-7.87	8.35e-06	1.34e-08	Poorly soluble	Low	No	No	No	No	No	No	Yes	-3.21	1	4	1	1	3	0.55	0	0	3	7.51
Resveratrol	CC(C(=C)CC[C@@H]([C@@H]1C[C@@H]([C@]2([C@]1(C)CCC1=C2CC[C@H]2[C@@]1(C)CC[C@H](C2(C)C)O)C)O)C(=O)O)C	C31H50O4	486.73	35	0	0.84	6	4	3	144.78	77.76	4.2	6.65	6.76	5.06	6.27	5.79	-6.65	0.000109	2.23e-07	Poorly soluble	-8.08	4e-06	8.22e-09	Poorly soluble	-5.72	0.000925	1.9e-06	Moderately soluble	Low	No	No	No	No	No	No	Yes	-4.55	1	4	0	1	1	0.56	0	1	2	6.36
Rohitukine	COc1c(O)c(C)cc2c1c(C=O)c(cc2)O	C13H12O4	232.23	17	10	0.15	2	4	2	64.84	66.76	2.21	2.81	2.38	1.18	2.64	2.24	-3.35	0.103	0.000443	Soluble	-3.87	0.0314	0.000135	Soluble	-3.39	0.0937	0.000404	Soluble	High	Yes	No	Yes	No	No	No	Yes	-5.72	0	0	0	0	0	0.55	0	1	1	1.74
rollidecin A	COc1ccc(cc1)c1cc(=O)c2c(o1)c(OC)c(c(c2OC)OC)OC	C20H20O7	372.37	27	16	0.25	6	7	0	100.38	76.36	3.71	3.04	3.5	0.63	4.21	3.02	-4.11	0.0291	7.83e-05	Moderately soluble	-4.31	0.0183	4.9e-05	Moderately soluble	-6.71	7.24e-05	1.95e-07	Poorly soluble	High	Yes	No	No	No	Yes	No	Yes	-6.41	0	0	0	0	0	0.55	0	0	1	3.74
Rollidecin B	OC[C@H]1[C@H](CO[C@@H]1c1ccc(c(c1)O)O)Cc1ccc(c(c1)OC)O	C19H22O6	346.37	25	12	0.37	5	6	4	92.62	99.38	2.42	2.07	2.03	0.94	2.33	1.96	-3.32	0.167	0.000482	Soluble	-3.79	0.0567	0.000164	Soluble	-3.67	0.0735	0.000212	Soluble	High	No	Yes	No	No	No	Yes	No	-6.94	0	0	0	0	0	0.55	1	1	0	3.78
Rollinecins A	CC1=CC[C@](CC1)(O)C(C)C	C10H18O	154.25	11	0	0.8	1	1	1	48.8	20.23	2.56	3.26	2.5	2.3	2.44	2.61	-2.78	0.254	0.00164	Soluble	-3.36	0.0675	0.000438	Soluble	-1.91	1.92	0.0124	Soluble	High	Yes	No	No	No	No	No	No	-4.93	0	1	0	0	2	0.55	0	1	1	3.28
Rollinecins B	COc1ccc(cc1)c1cc(=O)c2c(o1)cc(c(c2OC)OC)OC	C19H18O6	342.34	25	16	0.21	5	6	0	93.89	67.13	3.43	3.07	3.49	0.94	4.14	3.01	-4.04	0.0312	9.12e-05	Moderately soluble	-4.15	0.0244	7.13e-05	Moderately soluble	-6.61	8.5e-05	2.48e-07	Poorly soluble	High	Yes	No	Yes	Yes	Yes	Yes	Yes	-6.21	0	0	0	0	0	0.55	0	0	0	3.51
Sapindoside B	C[C@H]1CC[C@]2(NC1)O[C@@H]1[C@H]([C@@H]2C)[C@@]2([C@@H](C1)[C@@H]1CC[C@@H]3[C@]([C@H]1CC2)(C)CC[C@@H](C3)O)C	C27H45NO2	415.65	30	0	1	0	3	2	127.7	41.49	4.24	6.21	4.99	5.08	3.99	4.9	-6.33	0.000195	4.68e-07	Poorly soluble	-6.87	5.65e-05	1.36e-07	Poorly soluble	-4.82	0.00629	1.51e-05	Moderately soluble	High	Yes	Yes	No	No	No	No	No	-4.43	1	1	0	0	1	0.55	0	0	2	6.43
Secofoveogline	CC(=CCc1c2OC(C)(C)C=Cc2c(c2c1oc1c(O)c(O)ccc1c2=O)O)C	C23H22O6	394.42	29	14	0.26	2	6	3	113.9	100.13	2.87	5.3	4.65	1.98	4.62	3.88	-5.85	0.000558	1.41e-06	Moderately soluble	-7.15	2.77e-05	7.02e-08	Poorly soluble	-5.62	0.000937	2.38e-06	Moderately soluble	High	No	No	No	No	Yes	No	No	-4.94	0	0	0	0	1	0.55	1	3	2	4.16
Sesamin	OC/C(=C/CNc1ncnc2c1[nH]cn2)/C	C10H13N5O	219.24	16	9	0.3	4	4	3	60.91	86.72	1.04	0.67	0.51	-0.03	1.02	0.64	-1.77	3.69	0.0168	Very soluble	-2.07	1.88	0.00856	Soluble	-2.94	0.253	0.00116	Soluble	High	No	No	No	No	No	No	No	-7.16	0	0	0	0	0	0.55	0	1	1	2.54
Silvestrol	CC(=O)O[C@H](C[C@H]([C@H]1CC[C@@]2([C@]1(C)CC[C@@]1([C@H]2[C@@H](OC(=O)C)C=C2[C@H]1CC[C@@H](C2(C)C)OC(=O)C)C)C)C)C=C(C)C	C36H56O6	584.83	42	0	0.81	10	6	0	168.58	78.9	4.89	8.53	7.99	5.79	7.37	6.91	-8.18	3.87e-06	6.61e-09	Poorly soluble	-10.06	5.1e-08	8.72e-11	Insoluble	-6.79	9.59e-05	1.64e-07	Poorly soluble	Low	No	Yes	No	No	No	No	No	-3.81	2	4	0	1	1	0.17	0	2	3	7.1
Sitoindoside IX	CC(=C[C@@H](C[C@H]([C@H]1CC[C@@]2([C@]1(C)CC[C@@]1([C@H]2[C@@H](OC(=O)c2ccccc2)C=C2[C@H]1CC[C@@H](C2(C)C)OC(=O)c1ccccc1)C)C)C)OC(=O)c1ccccc1)C	C51H62O6	771.03	57	18	0.51	13	6	0	228.28	78.9	6.15	13.5	11.87	8.4	10.55	10.1	-12.5	2.43e-10	3.15e-13	Insoluble	-15.22	4.68e-13	6.07e-16	Insoluble	-12.9	9.66e-11	1.25e-13	Insoluble	Low	No	Yes	No	No	No	No	No	-1.42	2	4	1	1	2	0.17	0	2	3	7.74
Squamocin	COc1cc(cc(c1O)OC)c1cc(=O)c2c(o1)cc(cc2O)O	C17H14O7	330.29	24	16	0.12	3	7	3	86.97	109.36	2.58	3.07	2.59	-0.07	2.59	2.15	-4.12	0.0252	7.63e-05	Moderately soluble	-5.03	0.00306	9.26e-06	Moderately soluble	-4.63	0.00771	2.33e-05	Moderately soluble	High	No	No	Yes	No	Yes	Yes	Yes	-6.14	0	0	0	0	0	0.55	0	0	0	3.21
Squamocin-D	Oc1cc(/C=C/C(=O)[C@@]23CC[C@@]4([C@H](C2=CC[C@@H]2[C@@]3(C)CC[C@@H]3[C@]2(C)CC[C@@H](C3(C)C)O)CC(CC4)(C)C)C(=O)O)ccc1O	C38H52O6	604.82	44	6	0.68	4	6	4	175.32	115.06	3.76	7.56	7.8	4.89	6.57	6.12	-8.19	3.91e-06	6.46e-09	Poorly soluble	-9.81	9.31e-08	1.54e-10	Poorly soluble	-6.96	6.59e-05	1.09e-07	Poorly soluble	Low	No	Yes	No	No	No	No	Yes	-4.62	2	4	0	1	2	0.56	1	3	2	6.72
Squamostatin-A	COC(=O)[C@@]12CCC(C[C@@H]2C2=CC[C@@H]3[C@@]([C@@]2(CC1)COC(=O)/C=C/c1ccc(c(c1)OC)O)(C)CC[C@@H]1[C@]3(C)CC[C@@H](C1(C)C)O)(C)C	C41H58O7	662.9	48	6	0.71	8	7	2	190	102.29	5.56	8.68	8.16	5.42	7.67	7.1	-8.98	6.9e-07	1.04e-09	Poorly soluble	-10.71	1.3e-08	1.97e-11	Insoluble	-8.43	2.45e-06	3.69e-09	Poorly soluble	Low	No	Yes	No	No	No	No	Yes	-4.18	2	4	0	1	2	0.17	0	3	3	7.15
Squamostatin-B	COc1cc(/C=C/C(=O)C[C@@]23CC[C@@]4([C@H](C2=CC[C@H]2[C@@]3(C)CC[C@@H]3[C@]2(C)CC[C@@H](C3(C)C)O)[C@@H](C)[C@@H](CC4)C)C(=O)O)ccc1O	C40H56O6	632.87	46	6	0.7	6	6	3	184.85	104.06	3.58	8.16	8.35	5.23	7.16	6.5	-8.61	1.57e-06	2.48e-09	Poorly soluble	-10.2	3.96e-08	6.25e-11	Insoluble	-7.58	1.65e-05	2.61e-08	Poorly soluble	Low	No	Yes	No	No	No	No	Yes	-4.37	2	4	0	1	2	0.56	0	2	2	6.92
Squamostatin-D	COc1cc(C=CC(=O)C[C@@]23CC[C@@]4([C@H](C2=CC[C@H]2[C@@]3(C)CC[C@@H]3[C@]2(C)CC[C@@H](C3(C)C)O)[C@@H](C)[C@@H](CC4)C)C(=O)O)ccc1O	C40H56O6	632.87	46	6	0.7	6	6	3	184.85	104.06	3.58	8.16	8.35	5.23	7.16	6.5	-8.61	1.57e-06	2.48e-09	Poorly soluble	-10.2	3.96e-08	6.25e-11	Insoluble	-7.58	1.65e-05	2.61e-08	Poorly soluble	Low	No	Yes	No	No	No	No	Yes	-4.37	2	4	0	1	2	0.56	0	2	2	6.92
Squamostatin-E	O=C(C[C@@]12CC[C@@]3([C@H](C1=CC[C@H]1[C@@]2(C)CC[C@@H]2[C@]1(C)CC[C@@H](C2(C)C)O)CC(CC3)(C)C)C(=O)O)/C=C/c1ccc(cc1)O	C39H54O5	602.84	44	6	0.69	5	5	3	178.1	94.83	3.91	8.33	8.48	5.61	7.46	6.76	-8.6	1.53e-06	2.53e-09	Poorly soluble	-10.19	3.92e-08	6.51e-11	Insoluble	-7.95	6.84e-06	1.14e-08	Poorly soluble	Low	No	No	No	No	No	No	Yes	-4.06	2	4	0	1	2	0.56	0	2	2	6.58
Sulphurenic acid	C[C@@H]1CC[C@]2([C@@H]([C@H]1C)C1=CC[C@H]3[C@@]([C@@]1(CC2)C)(C)CC[C@@H]1[C@]3(C)CC[C@@H](C1(C)C)O)C(=O)O	C30H48O3	456.7	33	0	0.9	1	3	2	136.91	57.53	3.95	7.34	7.09	5.82	5.46	5.93	-7.23	2.69e-05	5.89e-08	Poorly soluble	-8.38	1.92e-06	4.21e-09	Poorly soluble	-5.67	0.000972	2.13e-06	Moderately soluble	Low	No	No	No	No	No	No	No	-3.87	1	3	0	1	1	0.85	0	1	2	6.21
Syriacusins A	CCCCCCCCCCCC[C@H]([C@H]1CC[C@@H](O1)[C@H](OC(=O)C)C[C@@H](CCCCCCCCC[C@@H](CCC1=C[C@H](OC1=O)C)O)O)O	C39H70O8	666.97	47	0	0.9	30	8	3	192.03	122.52	7.71	10.44	8.41	4.09	10.32	8.19	-8.57	1.79e-06	2.68e-09	Poorly soluble	-12.96	7.35e-11	1.1e-13	Insoluble	-8.76	1.15e-06	1.73e-09	Poorly soluble	Low	No	Yes	No	No	No	No	Yes	-2.96	1	4	1	1	3	0.55	0	1	3	7.83
Tangeretin	CCCC=C[C@H]1COC(=C(C1)CC)OOC1=C(CC)C[C@H](CO1)C=CCCC	C24H38O4	390.56	28	0	0.67	11	4	0	115.7	36.92	5.73	6.83	6.96	4.4	6.18	6.02	-5.84	0.000567	1.45e-06	Moderately soluble	-7.41	1.51e-05	3.85e-08	Poorly soluble	-5.18	0.00255	6.53e-06	Moderately soluble	Low	No	No	Yes	Yes	Yes	No	Yes	-3.83	1	1	1	1	1	0.55	0	2	3	5.77
Taxiresinol	O=CN1c2cc(OC)c(cc2[C@]23[C@@H]1[C@@](O)(C(=O)OC)[C@H](OC(=O)C)[C@]1([C@@H]3N(CC2)CC=C1)CC)[C@]1(C[C@@H]2CN(CCc3c1[nH]c1c3cccc1)C[C@](C2)(O)CC)C(=O)OC	C46H56N4O10	824.96	60	15	0.57	11	12	3	233.11	171.17	4.7	3.13	2.38	2.35	4.43	3.4	-6.39	0.000339	4.11e-07	Poorly soluble	-6.39	0.000333	4.04e-07	Poorly soluble	-8	8.25e-06	1e-08	Poorly soluble	Low	No	Yes	No	No	No	No	Yes	-9.11	2	3	2	1	4	0.17	0	3	2	9.59
Terpinen-4-ol	OCC1=C(C)C[C@@H](OC1=O)[C@H]([C@H]1CC[C@@H]2[C@]1(C)CC[C@H]1[C@@H]2C[C@@H]2[C@]3([C@]1(C)C(=O)C[C@@H]([C@@H]3O)O)O2)C	C28H40O7	488.61	35	0	0.86	3	7	3	129.13	116.59	3.04	2.85	2.55	2.04	3.45	2.79	-4.47	0.0167	3.41e-05	Moderately soluble	-4.96	0.00539	1.1e-05	Moderately soluble	-3.44	0.178	0.000364	Soluble	High	No	Yes	No	No	No	No	No	-7.26	0	2	0	0	0	0.55	0	1	1	6.9
Tetra-o-methylscutellarein	OC[C@H]1O[C@H](OC[C@H]2O[C@@H](O[C@H]3C[C@H](O)[C@]4(C(=CC[C@H]5[C@@H]4CC[C@]4([C@H]5CC[C@H]4[C@@H]([C@H]4CC(=C(C(=O)O4)CO)C)C)C)C3)C)[C@@H]([C@H]([C@@H]2O)O)O)[C@@H]([C@H]([C@@H]1O)O)O	C40H62O15	782.91	55	0	0.88	9	15	9	194.21	245.29	4.28	0.99	-0.19	-1.03	-0.27	0.76	-4.72	0.0148	1.89e-05	Moderately soluble	-5.73	0.00146	1.86e-06	Moderately soluble	-0.2	499	0.637	Soluble	Low	No	Yes	No	No	No	No	No	-10.37	3	3	1	1	4	0.17	0	1	2	8.88
Tomatidine	C[C@@H]1[C@@H](C)C[C@@H](OC1=O)[C@@]([C@H]1[C@@H](O)C[C@@H]2[C@]1(C)CC[C@H]1[C@H]2C[C@@H]2[C@]3([C@]1(C)C(=O)C=C[C@@H]3O)O2)(O)C	C28H40O7	488.61	35	0	0.86	2	7	3	129.16	116.59	3.22	3.08	2.4	2.04	2.51	2.65	-4.68	0.0103	2.1e-05	Moderately soluble	-5.2	0.00311	6.37e-06	Moderately soluble	-2.52	1.47	0.00301	Soluble	High	No	Yes	No	No	No	No	No	-7.09	0	2	0	0	0	0.55	0	1	1	7
xanthone V1	COc1cc(O)c(c(c1C(=O)/C=C/c1ccc(cc1)O)O)CC=C(C)C	C21H22O5	354.4	26	12	0.19	6	5	3	102.53	86.99	2.93	5.07	4.11	2.36	4.31	3.76	-5.18	0.00236	6.65e-06	Moderately soluble	-6.64	8.14e-05	2.3e-07	Poorly soluble	-4.58	0.00926	2.61e-05	Moderately soluble	High	No	No	Yes	No	Yes	No	Yes	-4.86	0	0	0	0	1	0.55	0	2	2	3.16
Trans-Zeatin	C[C@@H](C(=C)CC[C@H]([C@H]1CC[C@@H]2[C@]1(C)CC(=O)C1=C2C(=O)C[C@H]2[C@]1(C)CCC(=O)[C@H]2C)C)C(=O)O	C29H40O5	468.62	34	0	0.72	6	5	1	133.96	88.51	3.22	5.28	5.58	3.59	6.1	4.75	-5.68	0.000988	2.11e-06	Moderately soluble	-6.89	6.05e-05	1.29e-07	Poorly soluble	-5.81	0.000733	1.56e-06	Moderately soluble	High	No	Yes	No	No	Yes	No	No	-5.41	0	2	0	0	1	0.56	0	1	2	5.89
Triacetylbalsaminol F	C[C@@H](C(=C)CC[C@H]([C@H]1CC[C@@H]2[C@]1(C)[C@@H](O)C(=O)C1=C2C(=O)C[C@H]2[C@]1(C)CC[C@H]([C@H]2C)O)C)C(=O)O	C29H42O6	486.64	35	0	0.76	6	6	3	136.09	111.9	3.2	5.01	4.34	2.86	4.63	4.01	-5.62	0.00117	2.41e-06	Moderately soluble	-7.1	3.87e-05	7.94e-08	Poorly soluble	-4.29	0.0251	5.16e-05	Moderately soluble	High	No	Yes	No	No	No	No	Yes	-5.71	0	3	0	0	1	0.56	0	1	2	6.28
Tribenzoylbalsaminol F	CC(=O)C1=C(O)C=C2[C@](C1=O)(C)c1c(O)c(C)c(c(c1O2)C(=O)C)O	C18H16O7	344.32	25	6	0.28	2	7	3	87.43	121.13	1.66	3.58	2.13	-0.52	2.59	1.89	-4.28	0.0182	5.3e-05	Moderately soluble	-5.81	0.000533	1.55e-06	Moderately soluble	-3.08	0.284	0.000826	Soluble	High	No	No	Yes	No	Yes	No	Yes	-5.86	0	0	0	0	0	0.56	0	1	1	4.08
Tricin	COc1ccc(cc1)C1CC(=O)c2c(O1)cc(cc2O)OC	C17H16O5	300.31	22	12	0.24	3	5	1	80.51	64.99	2.36	3.17	2.79	1.2	3.09	2.52	-3.9	0.0374	0.000125	Soluble	-4.21	0.0187	6.23e-05	Moderately soluble	-4.81	0.00462	1.54e-05	Moderately soluble	High	Yes	No	Yes	Yes	No	Yes	Yes	-5.88	0	0	0	0	0	0.55	0	0	0	3.22
Uncarinic acid A	CC(c1cc2c(o1)C(=O)c1c(C2=O)cccc1)O	C14H10O4	242.23	18	11	0.14	1	4	1	62.95	67.51	1.91	1.82	1.78	0.17	2.98	1.73	-2.87	0.323	0.00133	Soluble	-2.86	0.336	0.00139	Soluble	-4.32	0.0115	4.74e-05	Moderately soluble	High	Yes	No	Yes	No	No	No	No	-6.49	0	0	0	0	0	0.55	1	0	1	3.66
Uncarinic acid B	CC(=O)[C]1[CH]c2c(O1)c(=C)c1c(c2=C)cccc1	C16H12O2	236.27	18	10	0.19	1	2	0	71.32	26.3	0	2.28	1.48	2.6	4.61	2.19	-3.09	0.194	0.00082	Soluble	-2.47	0.802	0.00339	Soluble	-5.28	0.00124	5.26e-06	Moderately soluble	High	Yes	No	No	No	No	Yes	No	-6.12	0	0	0	0	0	0.55	0	0	1	2.94
Uncarinic acid C	COc1cc(ccc1O)c1oc2cc(O)cc(c2c(=O)c1OC)O	C17H14O7	330.29	24	16	0.12	3	7	3	86.97	109.36	2.61	3.28	2.59	-0.07	2.59	2.2	-4.25	0.0186	5.63e-05	Moderately soluble	-5.25	0.00185	5.61e-06	Moderately soluble	-4.63	0.00771	2.33e-05	Moderately soluble	High	No	No	Yes	No	Yes	Yes	Yes	-5.99	0	0	0	0	0	0.55	0	0	0	3.4
Uncarinic acid D	COc1cc2c(cc1O)OC1C2COc2c1ccc(c2)O	C16H14O5	286.28	21	12	0.25	1	5	2	75.19	68.15	2.46	2.41	2.39	1.31	2.26	2.16	-3.49	0.0926	0.000324	Soluble	-3.48	0.0941	0.000329	Soluble	-3.73	0.0533	0.000186	Soluble	High	Yes	Yes	Yes	Yes	No	Yes	Yes	-6.34	0	0	0	0	0	0.55	0	0	0	3.61
Uncarinic acid E	COc1c(ccc(c1OC)OC)C1COc2c(C1=O)ccc(c2)O	C18H18O6	330.33	24	12	0.28	4	6	1	87	74.22	2.79	2.63	2.78	0.89	3.14	2.45	-3.65	0.0738	0.000223	Soluble	-3.84	0.0479	0.000145	Soluble	-4.92	0.00393	1.19e-05	Moderately soluble	High	Yes	No	Yes	Yes	Yes	Yes	Yes	-6.45	0	0	0	0	0	0.55	0	0	0	3.58
Ursolic acid	COc1cc2O[C@H](c3ccc(c(c3)O)O)[C@H](C(=O)c2c(c1)O)OC(=O)C	C18H16O8	360.31	26	12	0.22	4	8	3	88.96	122.52	2.03	1.85	1.74	0.04	1.65	1.46	-3.32	0.174	0.000482	Soluble	-4.04	0.0326	9.04e-05	Moderately soluble	-3.35	0.162	0.000451	Soluble	High	No	Yes	No	No	No	No	No	-7.18	0	0	0	0	0	0.55	1	1	1	3.9
Uvaribonin	COc1c(oc2c(c1=O)c(O)cc(c2)O)c1ccc(c(c1)O)O	C16H12O7	316.26	23	16	0.06	2	7	4	82.5	120.36	2	2.71	2.29	-0.31	2.06	1.75	-3.89	0.0407	0.000129	Soluble	-4.89	0.00407	1.29e-05	Moderately soluble	-3.94	0.0365	0.000115	Soluble	High	No	No	Yes	No	No	Yes	Yes	-6.31	0	0	0	0	0	0.55	1	1	0	3.29
Vaccinperoxypyran	O=C1OCC(=C1)[C@H]1CC[C@]2([C@]1(C)CCC1C2CC[C@]2(C1(O)CCC(C2)O[C@H]1O[C@@H](C)[C@@H]([C@H]([C@@H]1O)O)O)O)O	C28H42O10	538.63	38	0	0.89	3	10	6	133.83	166.14	2.9	-1.59	0.3	0.21	0.4	0.44	-1.98	5.64	0.0105	Very soluble	-1.39	21.9	0.0407	Very soluble	-0.94	62.6	0.116	Soluble	Low	No	Yes	No	No	No	No	No	-10.71	2	3	1	1	2	0.17	0	1	1	6.84
Vincristine			0	0	0	0.89	0	10	6	0	0	2.9	-1.59	0.3	0.21	0.4	0.44	-1.98	5.64	0.0105	Very soluble	-1.39	21.9	0.0407	Very soluble	-0.94	62.6	0.116	Soluble	Low	No	Yes	No	No	No	No	No	-10.71	2	3	1	1	2	0.17	0	1	1	6.84
Viscosalactone B	COC1=CC(=O)C(=CC1=O)c1coc2c(c1=O)c(O)cc(c2)O	C16H10O7	314.25	23	10	0.06	2	7	2	79.55	114.04	1.76	1.32	1.27	-1.19	2.07	1.05	-2.81	0.487	0.00155	Soluble	-3.32	0.152	0.000483	Soluble	-3.52	0.0953	0.000303	Soluble	High	No	No	No	No	No	No	Yes	-7.28	0	0	0	0	0	0.56	1	1	0	3.41
Withanoside IV	CC=CC(=O)O[C@@H]1[C@@H](O)[C@@H]2[C@]3([C@@]1(C)[C@@]1(C)CCC(=C[C@H]1O2)C)CO3	C19H26O5	334.41	24	0	0.74	3	5	1	88.18	68.29	3.2	1.67	2.14	1.75	2.77	2.31	-2.77	0.571	0.00171	Soluble	-2.72	0.64	0.00191	Soluble	-2.2	2.11	0.00631	Soluble	High	Yes	No	No	No	No	No	No	-7.15	0	0	0	0	0	0.55	0	3	0	5.61
Withaphysacarpin	COc1ccc2c(c1)n1c(=O)ccc3c1c2ccn3	C15H10N2O2	250.25	19	16	0.07	1	3	0	74.15	43.6	2.26	2.39	2.45	2.09	2.69	2.38	-3.45	0.0879	0.000351	Soluble	-2.95	0.283	0.00113	Soluble	-5.05	0.00222	8.85e-06	Moderately soluble	High	Yes	No	Yes	No	No	No	Yes	-6.13	0	0	0	0	0	0.55	0	0	0	2
Xanthohumol	COc1ccc2c(c1)n1c(=O)ccc3c1c2cc[n+]3[O-]	C15H10N2O3	266.25	20	16	0.07	1	3	0	77.52	56.17	1.8	1.4	1.69	2.34	1.38	1.72	-2.9	0.336	0.00126	Soluble	-2.18	1.74	0.00655	Soluble	-3.65	0.0593	0.000223	Soluble	High	Yes	No	Yes	No	No	No	No	-6.93	0	0	0	0	0	0.55	0	2	0	2.43
Zhankuic acid A	CC1=CC2C(CC1)C(C)(O)CCC2C(C)C	C15H26O	222.37	16	0	0.87	1	1	1	70.72	20.23	3.15	3.34	3.78	3.67	3.22	3.43	-3.26	0.123	0.000554	Soluble	-3.44	0.0804	0.000361	Soluble	-2.73	0.41	0.00185	Soluble	High	Yes	No	No	Yes	No	No	No	-5.29	0	0	0	0	1	0.55	0	1	1	4.29
Zhankuic acid C	O=C1C2=C(CCC(O2)(C)C)C(=O)c2c1cccc2	C15H14O3	242.27	18	6	0.33	0	3	0	67.29	43.37	2.31	2.65	2.91	1.4	3.53	2.56	-3.26	0.134	0.000552	Soluble	-3.21	0.149	0.000614	Soluble	-4.59	0.00617	2.55e-05	Moderately soluble	High	Yes	No	Yes	Yes	No	No	Yes	-5.9	0	0	0	0	0	0.85	1	0	1	3.25
(-)-Usnic acid	OC(=O)CCc1nccc2c1[nH]c1c2cccc1	C14H12N2O2	240.26	18	13	0.14	3	3	2	69.95	65.98	1.38	2.11	2.73	1.44	3.09	2.15	-3	0.243	0.00101	Soluble	-3.13	0.18	0.000748	Soluble	-4.78	0.00401	1.67e-05	Moderately soluble	High	Yes	No	Yes	No	No	No	No	-6.27	0	0	0	0	0	0.85	0	0	1	1.98
(S)-5-hydroxy-7,4'-dimethoxyflavanone	C=C1CC[C@H]2O[C@@]2(CC[C@@H]2[C@@H]1CC2(C)C)C	C15H24O	220.35	16	0	0.87	0	1	0	68.27	12.53	3.15	3.56	3.94	3.67	4.07	3.68	-3.45	0.0784	0.000356	Soluble	-3.51	0.0683	0.00031	Soluble	-3.51	0.0681	0.000309	Soluble	High	Yes	No	No	Yes	Yes	No	No	-5.12	0	0	0	0	1	0.55	0	2	2	4.35
2-(1-hydroxyethyl)naphtho[2,3-b]furan-4,9-quinone	CC(C1CCC(=C)C=C1)C	C10H16	136.23	10	0	0.6	1	0	0	47.12	0	2.65	3.44	3.16	3.27	2.84	3.07	-2.79	0.223	0.00164	Soluble	-3.12	0.103	0.000757	Soluble	-2.03	1.28	0.00942	Soluble	Low	Yes	No	No	No	No	No	No	-4.69	0	1	0	0	2	0.55	0	0	1	3.73
2-acetylnaphtho[2,3-b]furan-4,9-quinone	C=C1CCC2CC1C2(C)C	C10H16	136.23	10	0	0.8	0	0	0	45.22	0	2.59	4.16	3	4.29	3.08	3.42	-3.31	0.0674	0.000495	Soluble	-3.87	0.0185	0.000136	Soluble	-2.48	0.455	0.00334	Soluble	Low	Yes	No	No	No	Yes	No	No	-4.18	1	1	0	0	2	0.55	0	1	2	3.73
3,3'-di-O-Methylquercetin	OC1CC2C(C1(C)CC2)(C)C	C10H18O	154.25	11	0	1	0	1	1	46.6	20.23	2.29	2.72	2.19	2.45	2.27	2.38	-2.51	0.477	0.00309	Soluble	-2.8	0.245	0.00159	Soluble	-1.91	1.92	0.0124	Soluble	High	Yes	No	No	No	No	No	No	-5.31	0	1	0	0	2	0.55	0	0	1	3.43
3,8-dihydroxy-9-methoxypterocarpan	CC(=O)OC1CC2C(C1(C)CC2)(C)C	C12H20O2	196.29	14	0	0.92	2	2	0	56.34	26.3	2.5	4.3	2.76	2.76	2.66	3	-3.63	0.0456	0.000232	Soluble	-4.57	0.00534	2.72e-05	Moderately soluble	-2.58	0.52	0.00265	Soluble	High	Yes	No	No	No	Yes	No	No	-4.44	0	0	0	0	1	0.55	0	0	2	3.64
3'-O-methylviolanone	O=C1CC2C(C1(C)CC2)(C)C	C10H16O	152.23	11	0	0.9	0	1	0	45.64	17.07	2.12	2.19	2.4	2.3	2.85	2.37	-2.16	1.04	0.00686	Soluble	-2.18	1	0.00657	Soluble	-2.6	0.383	0.00252	Soluble	High	Yes	No	No	No	No	No	No	-5.67	0	1	0	0	2	0.55	0	0	1	3.22
3-O-Acetylpadmatin	O=c1ccc2c3n1c1ccccc1c3ccn2	C14H8N2O	220.23	17	16	0	0	2	0	67.66	34.37	1.99	2.42	2.44	2.41	2.71	2.39	-3.43	0.0825	0.000375	Soluble	-2.78	0.362	0.00164	Soluble	-4.93	0.00261	1.18e-05	Moderately soluble	High	Yes	No	Yes	No	No	No	No	-5.93	0	0	0	0	0	0.55	0	0	1	1.94
3-O-Methylquercetin	OC[C@H]1O[C@@H](Oc2ccc3c(c2)n2c(=O)ccc4c2c3ccn4)[C@@H]([C@H]([C@@H]1O)O)O	C20H18N2O7	398.37	29	16	0.3	3	8	4	101.81	133.75	1.42	0.26	-0.38	-0.33	-0.03	0.19	-2.68	0.825	0.00207	Soluble	-2.63	0.934	0.00235	Soluble	-2.67	0.862	0.00216	Soluble	High	No	No	No	No	No	No	No	-8.55	0	0	0	1	0	0.55	0	0	1	4.41
toxicarioside M	O=C(O[C@H]1CC[C@]2([C@H](C1(C)C)CC[C@@]1([C@@H]2CC=C2[C@@]1(C)CC[C@@]1([C@H]2[C@@H](C)[C@H](C)CC1)C(=O)O)C)C)C=Cc1ccc(cc1)O	C39H54O5	602.84	44	6	0.69	5	5	2	178.29	83.83	4.59	9.65	8.95	6.42	7.21	7.36	-9.43	2.25e-07	3.73e-10	Poorly soluble	-11.33	2.85e-09	4.73e-12	Insoluble	-7.79	9.69e-06	1.61e-08	Poorly soluble	Low	No	No	No	No	No	No	No	-3.13	2	4	0	1	2	0.56	0	2	2	6.82
4-hydroxy-3-methoxy-8,9-methylenedioxypterocarpan	O=C/C=C(/CCC=C(C)C)\C	C10H16O	152.23	11	0	0.5	4	1	0	49.44	17.07	2.51	3.03	2.88	2.49	2.65	2.71	-2.43	0.567	0.00373	Soluble	-3.05	0.134	0.000883	Soluble	-1.96	1.66	0.0109	Soluble	High	Yes	No	No	No	No	No	No	-5.08	0	1	0	0	2	0.55	0	3	1	2.49
5-hydroxybowdichione	COc1cc2cc3CC(C)(O)CC(=O)c3c(c2c(c1/C=C/C(C)C)O)O	C21H24O5	356.41	26	10	0.38	3	5	3	102.86	86.99	3.45	4.06	3.7	1.81	4.37	3.48	-4.69	0.00721	2.02e-05	Moderately soluble	-5.59	0.000914	2.56e-06	Moderately soluble	-4.72	0.00681	1.91e-05	Moderately soluble	High	No	No	No	No	Yes	No	Yes	-5.59	0	0	0	0	0	0.55	0	0	2	3.76
8-dihydrotrichothecinol A	CC(=CCOc1cc(O)c2c(c1)cc1c(c2O)C(=O)CC(C1)(C)O)C	C20H22O5	342.39	25	10	0.35	3	5	3	97.1	86.99	3.38	3.79	3.48	1.59	3.86	3.22	-4.45	0.0122	3.56e-05	Moderately soluble	-5.31	0.00167	4.89e-06	Moderately soluble	-4.7	0.00688	2.01e-05	Moderately soluble	High	No	No	Yes	No	Yes	Yes	No	-5.7	0	0	0	0	0	0.55	0	1	1	3.5
9-methoxycanthin-6-one	CC(=C)C1CC2=C(O1)C(=O)c1c(C2=O)cccc1	C15H12O3	240.25	18	6	0.2	1	3	0	66.78	43.37	2.24	2.98	2.68	1.32	3.38	2.52	-3.39	0.0984	0.00041	Soluble	-3.55	0.067	0.000279	Soluble	-4.16	0.0168	7e-05	Moderately soluble	High	Yes	No	Yes	Yes	No	No	No	-5.65	0	0	0	0	0	0.85	1	1	1	3.67
9-methoxycanthin-6-one 3N-oxide	COc1ccc(cc1OC)CC1C(=O)OCC1Cc1ccc(c(c1)OC)OC	C22H26O6	386.44	28	12	0.41	8	6	0	105.07	63.22	3.31	3.91	3.3	2.34	4.54	3.48	-4.49	0.0126	3.25e-05	Moderately soluble	-4.94	0.00448	1.16e-05	Moderately soluble	-6.45	0.000139	3.59e-07	Poorly soluble	High	Yes	No	No	Yes	Yes	Yes	Yes	-5.88	0	0	0	0	0	0.55	0	0	3	3.55
Alpha-cadinol	CC(=CCc1c(O)ccc2c1OC[C@@H]1[C@H]2Oc2c1ccc1c2C=CC(O1)(C)C)C	C25H26O4	390.47	29	12	0.36	2	4	1	114.52	47.92	4.02	5.49	5.26	3.73	5.34	4.77	-5.89	0.000499	1.28e-06	Moderately soluble	-6.25	0.000217	5.57e-07	Poorly soluble	-6.25	0.000221	5.66e-07	Poorly soluble	High	Yes	Yes	No	Yes	Yes	Yes	Yes	-4.78	0	0	0	0	1	0.55	0	1	2	4.79
Alpha-lapachone	CC(=CCc1cc2c(cc1O)O[C@@H]1[C@H]2COc2c1ccc(c2CC=C(C)C)O)C	C25H28O4	392.49	29	12	0.36	4	4	2	116.14	58.92	4.13	6.14	5.4	3.73	5.68	5.02	-6.18	0.000257	6.55e-07	Poorly soluble	-7.16	2.72e-05	6.92e-08	Poorly soluble	-6.07	0.000331	8.43e-07	Poorly soluble	High	Yes	No	No	Yes	Yes	No	Yes	-4.33	0	0	0	0	1	0.55	0	1	2	4.55
Beta-carboline-1-propionic acid	CO[C@]12COc3c([C@@H]2Oc2c1ccc(c2CC=C(C)C)OC)ccc(c3)O	C22H24O5	368.42	27	12	0.36	4	5	1	102.66	57.15	3.63	3.99	3.84	2.34	4.48	3.66	-4.7	0.0073	1.98e-05	Moderately soluble	-4.89	0.00473	1.28e-05	Moderately soluble	-5.87	0.000494	1.34e-06	Moderately soluble	High	Yes	Yes	No	Yes	Yes	Yes	Yes	-5.71	0	0	0	0	0	0.55	0	1	2	4.38
Beta-caryophyllene oxide	O=c1ccc2c(o1)c1occc1cc2	C11H6O3	186.16	14	13	0	0	3	0	52.26	43.35	1.97	2.31	2.54	1.48	2.91	2.24	-3.14	0.136	0.00073	Soluble	-2.86	0.258	0.00138	Soluble	-4.5	0.00587	3.16e-05	Moderately soluble	High	Yes	No	Yes	No	No	No	No	-5.8	0	0	0	0	1	0.55	0	1	1	3.07
Beta-phellandrene	CC(=O)O[C@H]([C@@]1(C)CC[C@@H](O1)[C@](CCC=C(C)C)(O)C)CC[C@H]([C@]1(C)CC[C@@H](O1)[C@](CCC=C(C)C)(O)C)OC(=O)C	C34H58O8	594.82	42	0	0.82	17	8	2	167.59	111.52	5.98	5.94	6.5	3.11	7.42	5.79	-6.15	0.000423	7.11e-07	Poorly soluble	-8.06	5.22e-06	8.77e-09	Poorly soluble	-5.7	0.00118	1.98e-06	Moderately soluble	Low	No	No	No	No	No	No	Yes	-5.71	1	4	1	1	2	0.55	0	2	3	6.88
Beta-pinene	CC(=CCc1c(C)cc2c(c1O)c(O)c1c(c2)C(CC=C(C)C)(CC=C(C)C)C(=O)C=C1O)C	C30H36O4	460.6	34	10	0.37	6	4	3	143.21	77.76	4.64	8.39	7.5	4	7.58	6.42	-7.8	7.25e-06	1.57e-08	Poorly soluble	-9.89	5.93e-08	1.29e-10	Poorly soluble	-7.14	3.3e-05	7.16e-08	Poorly soluble	Low	No	Yes	No	Yes	No	No	Yes	-3.15	0	2	0	1	1	0.56	0	1	2	4.4
Borneol	CC(=CCC1(CC=C(C)C)C(=O)C(=C(c2c1cc1cc(C)cc(c1c2O)O)O)CC=C(C)C)C	C30H36O4	460.6	34	10	0.37	6	4	3	143.05	77.76	4.59	8.4	7.72	4	7.56	6.45	-7.81	7.14e-06	1.55e-08	Poorly soluble	-9.9	5.79e-08	1.26e-10	Poorly soluble	-7.36	1.99e-05	4.33e-08	Poorly soluble	Low	No	Yes	No	Yes	No	No	Yes	-3.15	0	2	0	1	1	0.56	0	1	2	4.41
Bornyl acetate	CC(=CCC1(CC=C(C)C)C(=O)C(=C(c2c1cc1c(CC=C(C)C)c(C)cc(c1c2O)O)O)CC=C(C)C)C	C35H44O4	528.72	39	10	0.4	8	4	3	166.77	77.76	5.22	10.33	9.23	4.85	9.47	7.82	-9.29	2.73e-07	5.16e-10	Poorly soluble	-11.9	6.6e-10	1.25e-12	Insoluble	-8.56	1.47e-06	2.77e-09	Poorly soluble	Low	No	Yes	No	Yes	No	No	No	-2.19	2	4	0	1	1	0.56	0	1	3	4.97
Camphor	CC(=CCc1cc2c(cc1O)OC[C@@H]1[C@H]2Oc2c1ccc1c2C=CC(O1)(C)C)C	C25H26O4	390.47	29	12	0.36	2	4	1	114.52	47.92	4.11	5.49	5.26	3.73	5.34	4.79	-5.89	0.000499	1.28e-06	Moderately soluble	-6.25	0.000217	5.57e-07	Poorly soluble	-6.25	0.000221	5.66e-07	Poorly soluble	High	Yes	Yes	No	Yes	Yes	Yes	Yes	-4.78	0	0	0	0	1	0.55	0	1	2	4.79
Canthin-6-one	O=Cc1c(O)cc(c2c1Oc1c(OC2=O)c(COC(=O)/C=C/C(=O)O)c(c(c1C)C(=O)O)O)C	C22H16O12	472.36	34	12	0.14	7	12	4	111.02	193.96	1.63	2.5	2.08	0.29	2.52	1.8	-4.14	0.034	7.2e-05	Moderately soluble	-6.22	0.000286	6.04e-07	Poorly soluble	-2.91	0.576	0.00122	Soluble	Low	No	No	Yes	No	No	No	No	-7.41	1	0	1	1	2	0.11	0	3	1	3.87
Canthin-6-one 9-O-beta-glucopyranoside	CC(=CCc1c2O[C@@]34[C@]5(C/C=C(\C(=O)O)/C)OC(C4C[C@@H](C5=O)C=C3C(=O)c2c(c2c1O[C@](C)(CCC=C(C)C)C=C2)O)(C)C)C	C38H44O8	628.75	46	6	0.5	8	8	2	177.62	119.36	4.89	7.33	7.13	3.27	7.81	6.09	-7.92	7.48e-06	1.19e-08	Poorly soluble	-9.66	1.36e-07	2.17e-10	Poorly soluble	-7.21	3.89e-05	6.18e-08	Poorly soluble	Low	No	Yes	No	No	Yes	No	Yes	-4.93	1	4	0	1	2	0.56	0	2	3	7.66
Cis-3-O-p-Hydroxycinnamoyl Ursolic Acid	CC1=CCCC(=C)C2C(CC1)C(C2)(C)C	C15H24	204.35	15	0	0.73	0	0	0	68.78	0	3.29	4.38	4.73	4.63	4.19	4.24	-3.87	0.0278	0.000136	Soluble	-4.1	0.0164	8.01e-05	Moderately soluble	-3.77	0.0349	0.000171	Soluble	Low	No	No	No	Yes	Yes	No	No	-4.44	1	0	0	0	1	0.55	0	1	2	4.51
Citral	CC(=CCc1c(C)cc(c2c1cc1c(c2O)C(=CC(=O)C1(CC=C(C)C)CC=C(C)C)O)O)C	C30H36O4	460.6	34	10	0.37	6	4	3	143.21	77.76	4.37	8.39	7.5	4	7.58	6.37	-7.8	7.25e-06	1.57e-08	Poorly soluble	-9.89	5.93e-08	1.29e-10	Poorly soluble	-7.14	3.3e-05	7.16e-08	Poorly soluble	Low	No	Yes	No	Yes	No	No	Yes	-3.15	0	2	0	1	1	0.56	0	1	2	4.38
Deacetylvismione A	O=C1OCc2c1cc1ccc3c(c1c2c1ccc2c(c1)OCO2)OCO3	C20H12O6	348.31	26	16	0.15	1	6	0	90.83	63.22	2.99	3.85	3.48	2.79	4.41	3.5	-4.81	0.00534	1.53e-05	Moderately soluble	-4.87	0.00466	1.34e-05	Moderately soluble	-6.24	0.000201	5.78e-07	Poorly soluble	High	Yes	Yes	Yes	Yes	Yes	No	Yes	-5.69	0	0	0	0	0	0.55	0	0	1	2.96
Deacetylvismione H	O=C1OC[C@@H]([C@H]1Cc1ccc2c(c1)OCO2)Cc1ccc2c(c1)OCO2	C20H18O6	354.35	26	12	0.35	4	6	0	91.23	63.22	3.08	3.65	2.72	2.71	4.04	3.24	-4.41	0.0137	3.85e-05	Moderately soluble	-4.67	0.00764	2.16e-05	Moderately soluble	-5.46	0.00122	3.44e-06	Moderately soluble	High	Yes	No	Yes	Yes	Yes	Yes	Yes	-5.87	0	0	0	0	0	0.55	0	0	2	3.53
Dehydro-iso-alpha-lapachone	COc1c(O)cc2c(c1O)c(=O)cc(o2)c1ccc(cc1)O	C16H12O6	300.26	22	16	0.06	2	6	3	80.48	100.13	2.27	2.99	2.59	0.22	2.55	2.12	-3.99	0.0306	0.000102	Soluble	-4.76	0.00526	1.75e-05	Moderately soluble	-4.52	0.00907	3.02e-05	Moderately soluble	High	No	No	Yes	No	No	Yes	Yes	-6.01	0	0	0	0	0	0.55	0	0	0	3.12
Dimethylmatairesinol	OCC1OC(OCC2=C3C(=O)C=C(C43CC(CC2)C(=C)C(=O)O4)C)C(C(C1OC(=O)C(=C)C1CCC(C2C(C1)(O)C(=CC2=O)C)CO)O)O	C36H44O13	684.73	49	0	0.61	9	13	5	171.14	206.35	2.75	-1.01	0.67	-0.34	2.31	0.88	-2.86	0.956	0.0014	Soluble	-2.84	0.998	0.00146	Soluble	-2.85	0.969	0.00142	Soluble	Low	No	No	No	No	No	No	No	-11.19	2	3	1	1	3	0.17	0	2	2	8.42
Erybreadin B	C=C(C1CC[C@@]2(C(C1)[C@](C)(O)CCC2)C)C(=O)O	C15H24O3	252.35	18	0	0.8	2	3	2	72.23	57.53	2.31	3.16	2.98	2.56	2.56	2.72	-3.26	0.138	0.000545	Soluble	-4.04	0.0231	9.15e-05	Moderately soluble	-2.2	1.6	0.00635	Soluble	High	Yes	No	No	No	No	No	No	-5.6	0	0	0	0	0	0.85	0	1	0	3.53
Erybreadin C	C=C1C(=O)O[C@@H]2[C@@H]1C[C@@H]1[C@@H](C(=C)C2)CC[C@@]1(C)O	C15H20O3	248.32	18	0	0.67	0	3	1	69.41	46.53	2.45	1.83	2.21	2.47	2.62	2.32	-2.53	0.729	0.00293	Soluble	-2.43	0.928	0.00374	Soluble	-2.49	0.796	0.00321	Soluble	High	Yes	No	No	No	No	No	No	-6.52	0	0	0	0	0	0.55	0	2	1	4.06
Erythribyssins A	COc1cc(O)c(c2c1C(=O)CC(O2)c1ccc(cc1)O)CC=C(C)C	C21H22O5	354.4	26	12	0.29	4	5	2	99.76	75.99	3.06	4.09	4	2.04	4.29	3.5	-4.69	0.00721	2.03e-05	Moderately soluble	-5.39	0.00144	4.06e-06	Moderately soluble	-5.35	0.00159	4.49e-06	Moderately soluble	High	Yes	No	No	Yes	Yes	No	Yes	-5.56	0	0	0	0	0	0.55	0	1	2	3.79
Eurycomanone	CC(=CCc1cc(ccc1O)[C@@H]1CC(=O)c2c(O1)c(CC=C(C)C)c(cc2O)O)C	C25H28O5	408.49	30	12	0.32	5	5	3	119.01	86.99	3.69	6.24	5.2	2.82	5.55	4.7	-6.27	0.000219	5.37e-07	Poorly soluble	-7.85	5.73e-06	1.4e-08	Poorly soluble	-5.87	0.00055	1.35e-06	Moderately soluble	High	No	No	No	No	Yes	No	Yes	-4.36	0	0	0	0	1	0.55	0	1	2	4.2
Eurylene	CC1=CCC(CC1)C(=C)C	C10H16	136.23	10	0	0.6	1	0	0	47.12	0	2.72	4.57	3.31	3.27	2.97	3.37	-3.5	0.0433	0.000318	Soluble	-4.29	0.00693	5.09e-05	Moderately soluble	-2.26	0.754	0.00553	Soluble	Low	Yes	No	No	No	Yes	No	No	-3.89	0	1	0	0	2	0.55	0	1	2	3.46
Ferruginin A	O=C1c2ccccc2c2c3c1nccc3cc1c2OCO1	C17H9NO3	275.26	21	16	0.06	0	4	0	76.67	48.42	2.14	3.39	3.17	1.71	3.96	2.88	-4.25	0.0156	5.67e-05	Moderately soluble	-4.09	0.0226	8.21e-05	Moderately soluble	-6.13	0.000204	7.41e-07	Poorly soluble	High	Yes	Yes	Yes	No	No	No	Yes	-5.57	0	0	0	0	0	0.55	0	0	0	2.77
Ferruginin B	O[C@H]1[C@H](C)C2C(=O)O[C@H]3[C@@]2([C@H]([C@H]1O)[C@@]1(C)[C@H](O)C(=O)C=C([C@@H]1[C@H]3O)C)C	C19H26O7	366.41	26	0	0.79	0	7	4	90.13	124.29	1	-0.56	-0.59	0.14	-0.11	-0.02	-1.76	6.38	0.0174	Very soluble	-1.58	9.63	0.0263	Very soluble	-0.41	144	0.392	Soluble	High	No	Yes	No	No	No	No	No	-8.93	0	1	0	0	0	0.55	0	0	1	5.39
Ferruginin C	CCCCCCCCCC[C@@H]([C@@H]1CC[C@@H](O1)[C@H]1CC[C@H](O1)[C@@H](CCCCCCCCCCCCC1=C[C@@H](OC1=O)C)O)O	C37H66O6	606.92	43	0	0.92	25	6	2	178.94	85.22	7.73	11.23	8.89	4.61	10	8.49	-9.03	5.69e-07	9.38e-10	Poorly soluble	-12.99	6.15e-11	1.01e-13	Insoluble	-8.83	9.06e-07	1.49e-09	Poorly soluble	Low	No	Yes	No	No	No	No	Yes	-2.03	2	4	1	1	3	0.17	0	0	3	7.39
Folitenol	COC(=O)[C@]1(C)CCC[C@@]([C@@H]1C(=O)O)(C)[C@@H]1CC[C@@H]2C[C@]1(CC2=C)C(=O)O	C21H30O6	378.46	27	0	0.76	5	6	2	100.29	100.9	2.04	3.22	3.5	2.92	3.12	2.96	-3.89	0.0493	0.00013	Soluble	-5.01	0.00369	9.74e-06	Moderately soluble	-2.96	0.411	0.00109	Soluble	High	No	Yes	No	No	No	No	No	-6.32	0	0	0	0	0	0.56	0	1	1	5.54
Fumarprotocetraric acid	C=C1C[C@@]23C[C@H]1CC[C@H]3[C@]1([C@@H]3[C@H](C2=O)OC(=O)[C@]3(C)CCC1)C	C20H26O3	314.42	23	0	0.8	0	3	0	87.91	43.37	2.57	3.81	3.67	3.66	4.13	3.57	-4.19	0.0203	6.46e-05	Moderately soluble	-4.42	0.0121	3.84e-05	Moderately soluble	-4.29	0.016	5.09e-05	Moderately soluble	High	Yes	No	No	No	Yes	No	No	-5.51	0	0	0	0	0	0.55	0	1	1	5.39
Gambogic acid	CCCCC#CC#CC#CCCCCCCCC(=O)O	C18H24O2	272.38	20	0	0.61	9	2	1	84.9	37.3	3.79	5.64	4.24	4.38	5.15	4.64	-4.49	0.00886	3.25e-05	Moderately soluble	-6.19	0.000177	6.5e-07	Poorly soluble	-3.94	0.0315	0.000116	Soluble	High	Yes	No	Yes	No	Yes	No	No	-3.96	1	0	0	0	1	0.85	0	1	2	3.48
Gamma-caryophyllene	OC[C@@H]1C[C@H](C(=O)O1)CCCCCCC#CC#CC#CCCC=C	C21H26O3	326.43	24	0	0.57	9	3	1	97.41	46.53	4.39	5	3.47	3.7	5.54	4.42	-4.42	0.0124	3.8e-05	Moderately soluble	-5.72	0.000627	1.92e-06	Moderately soluble	-3.9	0.0415	0.000127	Soluble	High	Yes	No	Yes	Yes	Yes	Yes	No	-4.74	0	0	0	0	0	0.55	0	2	2	4.42
Harunganin	CC1=CC(=O)C(C2(C1CC1OC(=O)C(C3(C41C2C(O)(OC4)C(C13CO1)O)O)O)C)O	C20H24O10	424.4	30	0	0.8	0	10	5	94.15	166.28	0.89	-3.25	-2.62	-1.56	-0.67	-1.44	-0.42	160	0.377	Very soluble	0.33	906	2.14	Highly soluble	0.03	454	1.07	Soluble	Low	No	Yes	No	No	No	No	No	-11.2	0	1	1	1	2	0.55	0	1	1	6.31
Helioxanthin	CCC1CN2CCc3c(C2CC1CC1=NCCc2c1cc(OC)c(c2)OC)cc(c(c3)OC)OC	C29H38N2O4	478.62	35	12	0.55	7	6	0	147.34	52.52	4.53	4.6	4.02	2.96	6.05	4.43	-5.5	0.00152	3.18e-06	Moderately soluble	-5.43	0.00179	3.74e-06	Moderately soluble	-7.91	5.83e-06	1.22e-08	Poorly soluble	High	Yes	Yes	No	No	No	Yes	Yes	-5.95	0	2	0	0	0	0.55	0	0	2	5.26
Hinokinin	O[O]=C1CC(C)CCC1=C(C)C	C10H17O2	169.24	12	0	0.7	0	2	1	50.42	37.3	-1.87	3.07	2.72	2.08	0.98	1.4	-2.82	0.254	0.0015	Soluble	-3.52	0.0511	0.000302	Soluble	-1.97	1.83	0.0108	Soluble	High	Yes	No	No	No	No	No	No	-5.15	0	0	0	0	1	0.55	0	2	1	3.42
Hispidulin	O=C1OC[C@@H](C1=Cc1ccc2c(c1)OCO2)Cc1ccc2c(c1)OCO2	C20H16O6	352.34	26	12	0.25	3	6	0	91.55	63.22	2.86	3.62	2.83	2.63	4.14	3.22	-4.45	0.0125	3.56e-05	Moderately soluble	-4.64	0.00816	2.32e-05	Moderately soluble	-5.32	0.00168	4.76e-06	Moderately soluble	High	Yes	No	Yes	Yes	Yes	Yes	Yes	-5.88	0	0	0	0	0	0.55	0	1	2	3.62
Hydroxyhypocretenolide-beta-D-glucoside-4',14"-hydroxyhypocretenoate	O=C[C@@]12CC[C@@H](C[C@@]2(O)CC[C@@H]2[C@@H]1CC[C@]1([C@]2(O)CC[C@@H]1C1=CC(=O)OC1)C)OC1OCC(C(C1O)O)O	C28H40O10	536.61	38	0	0.86	4	10	5	132.57	162.98	2.05	-0.91	0.36	0.11	0.99	0.52	-2.33	2.51	0.00468	Soluble	-2.03	5.01	0.00934	Soluble	-1.3	26.6	0.0497	Soluble	Low	No	Yes	No	No	No	No	No	-10.22	1	3	1	1	1	0.55	0	2	1	6.68
Ilicic acid	O=C1OCc2c1c(c1ccc3c(c1)OCO3)c1c(c2)cc2c(c1)OCO2	C20H12O6	348.31	26	16	0.15	1	6	0	90.83	63.22	3	3.85	3.48	2.79	4.41	3.51	-4.81	0.00534	1.53e-05	Moderately soluble	-4.87	0.00466	1.34e-05	Moderately soluble	-6.24	0.000201	5.78e-07	Poorly soluble	High	Yes	Yes	Yes	Yes	Yes	No	Yes	-5.69	0	0	0	0	0	0.55	0	0	1	2.94
Inuviscolide	Oc1c2COC(=O)c2c(c2c1cc1OCOc1c2)c1ccc2c(c1)OCO2	C20H12O7	364.31	27	16	0.15	1	7	1	92.86	83.45	2.79	3.49	3.19	2.26	3.92	3.13	-4.67	0.00779	2.14e-05	Moderately soluble	-4.93	0.00433	1.19e-05	Moderately soluble	-5.65	0.000812	2.23e-06	Moderately soluble	High	No	No	Yes	Yes	Yes	Yes	Yes	-6.04	0	0	0	0	0	0.55	0	0	1	3.06
Isoxanthohumol	CC1=C[C@@H]2[C@@H](CC1)[C@@](C)(O)CC[C@H]2C(C)C	C15H26O	222.37	16	0	0.87	1	1	1	70.72	20.23	3.21	3.34	3.78	3.67	3.22	3.44	-3.26	0.123	0.000554	Soluble	-3.44	0.0804	0.000361	Soluble	-2.73	0.41	0.00185	Soluble	High	Yes	No	No	Yes	No	No	No	-5.29	0	0	0	0	1	0.55	0	1	1	4.29
Lespedezaflavanone B	CC1=CCC(=C(C)C)CC1	C10H16	136.23	10	0	0.6	0	0	0	47.12	0	2.71	4.47	3.45	3.27	3.08	3.4	-3.5	0.043	0.000316	Soluble	-4.19	0.0088	6.46e-05	Moderately soluble	-2.46	0.473	0.00348	Soluble	Low	Yes	No	No	No	Yes	No	No	-3.96	0	1	0	0	2	0.55	0	1	2	2.98
Limonene	CC1=C[C@@H]2[C@H](CC1)[C@@](C)(O)CC[C@H]2C(C)C	C15H26O	222.37	16	0	0.87	1	1	1	70.72	20.23	3.07	3.34	3.78	3.67	3.22	3.42	-3.26	0.123	0.000554	Soluble	-3.44	0.0804	0.000361	Soluble	-2.73	0.41	0.00185	Soluble	High	Yes	No	No	No	No	No	No	-5.29	0	0	0	0	1	0.55	0	1	1	4.29
Liriodenine	O=C(O[C@H]1CC[C@]2([C@H](C1(C)C)CC[C@@]1([C@@H]2CC=C2[C@@]1(C)CC[C@@]1([C@H]2[C@@H](C)[C@H](C)CC1)C(=O)O)C)C)/C=C/c1ccc(cc1)O	C39H54O5	602.84	44	6	0.69	5	5	2	178.29	83.83	4.59	9.65	8.95	6.42	7.21	7.36	-9.43	2.25e-07	3.73e-10	Poorly soluble	-11.33	2.85e-09	4.73e-12	Insoluble	-7.79	9.69e-06	1.61e-08	Poorly soluble	Low	No	No	No	No	No	No	No	-3.13	2	4	0	1	2	0.56	0	2	2	6.82
Longilactone	CC=CC(=O)O[C@@H]1C[C@@H]2C3(C1(C)[C@@]1(C)CC(=O)C(=C[C@H]1O2)C)CO3	C19H24O5	332.39	24	0	0.68	3	5	0	87.22	65.13	3.27	1.9	2.35	1.66	3.35	2.51	-2.9	0.419	0.00126	Soluble	-2.89	0.428	0.00129	Soluble	-2.9	0.423	0.00127	Soluble	High	Yes	No	No	No	No	No	No	-6.98	0	0	0	0	0	0.55	0	2	0	5.41
Membranacin	CC=CC(=O)O[C@@H]1[C@@H](O)[C@@H]2[C@]3([C@@]1(C)[C@@]1(C)CC(=O)C(=C[C@H]1O2)C)CO3	C19H24O6	348.39	25	0	0.68	3	6	1	88.38	85.36	3.14	0.93	1.32	0.85	2.47	1.74	-2.39	1.43	0.00409	Soluble	-2.31	1.71	0.00491	Soluble	-2.08	2.9	0.00832	Soluble	High	No	No	No	No	No	No	No	-7.76	0	0	0	0	0	0.55	0	2	0	5.55
Methylmitrekaurenate	CC1=C[C@H]2O[C@@H]3C[C@H](C([C@]2(CC1=O)C)(C13CO1)C)O	C15H20O4	264.32	19	0	0.8	0	4	1	68.34	59.06	2.14	0.5	1.22	0.9	2.32	1.42	-1.79	4.25	0.0161	Very soluble	-1.31	12.9	0.0489	Very soluble	-2.18	1.73	0.00655	Soluble	High	Yes	Yes	No	No	No	No	No	-7.56	0	0	0	0	0	0.55	0	1	0	5.23
Mitrekaurenone	CC12C3C1CC(C2(C)C)C3	C10H16	136.23	10	0	1	0	0	0	43.32	0	2.53	3.24	2.69	4.43	2.79	3.14	-2.73	0.256	0.00188	Soluble	-2.91	0.166	0.00122	Soluble	-2.23	0.806	0.00592	Soluble	Low	Yes	No	No	No	No	No	No	-4.83	1	1	0	0	2	0.55	0	0	1	3.59
Octadeca-9,11,13-triynoic acid	CC[C@H]1CN2CCc3c([C@@H]2C[C@@H]1C[C@H]1NCCc2c1[nH]c1c2cc(cc1)O)cc(c(c3)OC)OC	C29H37N3O3	475.62	35	15	0.52	5	5	3	147.95	69.75	4.06	4.61	3.7	2.88	4.89	4.03	-5.68	0.000993	2.09e-06	Moderately soluble	-5.8	0.000754	1.59e-06	Moderately soluble	-7.76	8.25e-06	1.73e-08	Poorly soluble	High	Yes	Yes	No	No	No	No	No	-5.93	0	2	0	0	0	0.55	1	0	2	4.95
Oropheolide	OS(=O)(=O)O.O=CN1c2cc(OC)c(cc2[C@]23[C@@H]1[C@@](O)(C(=O)OC)[C@H](OC(=O)C)[C@]1([C@@H]3N(CC2)CC=C1)CC)[C@]1(C[C@@H]2CN(CCc3c1[nH]c1c3cccc1)C[C@](C2)(O)CC)C(=O)OC	C46H58N4O14S	923.04	65	15	0.57	11	16	5	247.33	254.15	3.25	-0.53	2.8	1.32	4.43	2.26	-4.67	0.0196	2.12e-05	Moderately soluble	-4.34	0.0423	4.59e-05	Moderately soluble	-8	9.23e-06	1e-08	Poorly soluble	Low	No	Yes	No	No	No	No	No	-12.31	2	3	2	1	4	0.17	0	4	2	9.92
Pasakbumin B	CC(=CCC1(CC=C(C)C)C(=O)C=C(c2c1cc1cc(C)cc(c1c2O)O)O)C	C25H28O4	392.49	29	10	0.32	4	4	3	119.49	77.76	3.42	6.47	5.99	3.08	5.7	4.93	-6.34	0.000179	4.56e-07	Poorly soluble	-7.9	4.96e-06	1.26e-08	Poorly soluble	-5.94	0.000451	1.15e-06	Moderately soluble	High	No	No	No	Yes	Yes	No	Yes	-4.1	0	1	0	1	1	0.56	0	1	2	3.84
Psychotrine	COc1cc2cc3CC(C)(O)CC(=O)c3c(c2c2c1C=CC(O2)(C)C)O	C21H22O5	354.4	26	10	0.38	1	5	2	100.44	75.99	2.88	3.57	3.51	1.81	4.07	3.17	-4.5	0.0111	3.13e-05	Moderately soluble	-4.85	0.00499	1.41e-05	Moderately soluble	-5.25	0.002	5.65e-06	Moderately soluble	High	Yes	Yes	Yes	Yes	Yes	Yes	Yes	-5.93	0	0	0	0	0	0.55	0	0	2	4.06
Pulegone	CC(=CCc1c(O)cc(cc1c1cc(=O)c2c(o1)c(CC=C(C)C)c(cc2O)O)O)C	C25H26O6	422.47	31	16	0.24	5	6	4	123.45	111.13	3.72	6.16	5.3	2.09	5.54	4.56	-6.39	0.000171	4.05e-07	Poorly soluble	-8.28	2.23e-06	5.28e-09	Poorly soluble	-6.27	0.000227	5.38e-07	Poorly soluble	Low	No	No	No	No	No	No	No	-4.5	0	0	0	0	1	0.55	0	1	2	4.24
Savinin	COc1cc(O)ccc1C/C=C/c1ccc(cc1)O	C16H16O3	256.3	19	12	0.12	4	3	2	76.37	49.69	2.46	3.75	3.25	2.76	3.46	3.14	-3.99	0.0259	0.000101	Soluble	-4.49	0.00837	3.27e-05	Moderately soluble	-4.39	0.0104	4.06e-05	Moderately soluble	High	Yes	No	Yes	Yes	Yes	Yes	Yes	-5.2	0	0	0	0	0	0.55	0	0	1	2.56
3-O-beta-D-xylopyranosylstrophanthidin	Cc1cc2c(ccc(c2cc1O)C)C(C)C	C15H18O	214.3	16	10	0.33	1	1	1	70.48	20.23	2.75	4.67	4.29	3.91	4.47	4.02	-4.51	0.00666	3.11e-05	Moderately soluble	-4.82	0.00323	1.51e-05	Moderately soluble	-5.1	0.00169	7.91e-06	Moderately soluble	High	Yes	No	No	No	No	Yes	No	-4.29	0	0	0	0	1	0.55	0	0	2	1.2
Taiwanin C	Oc1cc2OC(c3ccccc3)C(C(=O)c2c(c1)O)O	C15H12O5	272.25	20	12	0.13	1	5	3	70.71	86.99	1.75	1.66	1.45	0.44	1.64	1.39	-2.95	0.304	0.00112	Soluble	-3.1	0.216	0.000793	Soluble	-3.19	0.177	0.000649	Soluble	High	No	No	No	No	No	No	No	-6.78	0	0	0	0	0	0.55	0	0	0	3.38
Taiwanin E	Oc1cc(O)c2c(c1)occ(c2=O)c1ccc(c(c1)O)O	C15H10O6	286.24	21	16	0	1	6	4	76.01	111.13	1.86	2.53	2.28	-0.03	2.03	1.73	-3.71	0.0563	0.000197	Soluble	-4.51	0.00884	3.09e-05	Moderately soluble	-3.82	0.0429	0.00015	Soluble	High	No	No	Yes	No	No	Yes	Yes	-6.25	0	0	0	0	0	0.55	1	1	0	2.99
T-cadinol	COc1c(C/C=C/c2ccccc2)ccc(c1O)OC	C17H18O3	270.32	20	12	0.18	5	3	1	80.83	38.69	3.16	4.07	3.56	3.01	3.99	3.56	-4.19	0.0173	6.4e-05	Moderately soluble	-4.59	0.00699	2.59e-05	Moderately soluble	-5.09	0.0022	8.13e-06	Moderately soluble	High	Yes	No	Yes	Yes	Yes	Yes	No	-5.06	0	0	0	0	0	0.55	0	0	1	2.72
Terpinolene	C=C[C@](C[C@H](/C=C(/CC/C=C(/COC(=O)C)\C)\C)O)(O)C	C17H28O4	296.4	21	0	0.59	10	4	2	86.06	66.76	3.16	4.07	2.91	3.01	3.99	3.56	-4.19	0.0173	6.4e-05	Moderately soluble	-4.59	0.00699	2.59e-05	Moderately soluble	-5.09	0.0022	8.13e-06	Moderately soluble	High	Yes	No	Yes	Yes	Yes	Yes	No	-5.06	0	0	0	0	0	0.55	0	0	1	2.72
T-muurolol	CC1=CC(=O)[C@H]([C@]2([C@H]1C[C@H]1OC(=O)[C@@H]([C@@]3([C@]1([C@@H]2[C@@H](O)[C@@H]([C@@H]3C)O)C)O)O)C)O	C20H28O8	396.43	28	0	0.8	0	8	5	96.14	144.52	1.03	-0.97	-1.09	-0.42	-0.36	-0.36	-1.69	8.15	0.0206	Very soluble	-1.58	10.4	0.0263	Very soluble	-0.31	196	0.493	Soluble	Low	No	Yes	No	No	No	No	No	-9.41	0	1	1	1	0	0.55	0	0	1	5.53
Trans-3-O-p-Hydroxycinnamoyl Ursolic Acid	O=C1OC/C(=C/c2ccc3c(c2)OCO3)/C1=Cc1ccc2c(c1)OCO2	C20H14O6	350.32	26	12	0.15	2	6	0	91.86	63.22	3.23	3.3	2.95	2.56	4.25	3.26	-4.3	0.0175	5.01e-05	Moderately soluble	-4.3	0.0174	4.97e-05	Moderately soluble	-5.18	0.00232	6.62e-06	Moderately soluble	High	Yes	No	Yes	Yes	Yes	Yes	Yes	-6.09	0	0	0	0	0	0.55	0	1	1	3.37
Trichothecin	COc1ccc2c(c1)[nH]c1c2ccnc1CCC(=O)O	C15H14N2O3	270.28	20	13	0.2	4	4	2	76.44	75.21	1.56	2.08	2.74	1.14	3.12	2.13	-3.04	0.245	0.000905	Soluble	-3.29	0.139	0.000514	Soluble	-4.9	0.00342	1.26e-05	Moderately soluble	High	Yes	Yes	Yes	No	No	No	No	-6.47	0	0	0	0	0	0.56	0	0	0	2.1
Trichothecinol A	OCC1=C2C(=O)C=C([C@]32C[C@@H](CC1)C(=C)C(=O)O3)C	C15H16O4	260.29	19	0	0.47	1	4	1	69.14	63.6	1.95	0.33	1.46	1.44	2.69	1.57	-1.6	6.6	0.0254	Very soluble	-1.23	15.4	0.059	Very soluble	-2.81	0.402	0.00155	Soluble	High	Yes	No	No	No	No	No	No	-7.65	0	0	0	0	0	0.55	0	1	0	5.02
Trichothecolone	COc1c2c(OC[C@@H]3[C@H]2Oc2c3ccc(c2CC=C(C)C)O)cc(c1CC=C(C)C)O	C26H30O5	422.51	31	12	0.38	5	5	2	122.63	68.15	3.86	6.11	5.41	3.37	5.77	4.9	-6.27	0.000229	5.43e-07	Poorly soluble	-7.32	2.01e-05	4.76e-08	Poorly soluble	-6.17	0.000282	6.68e-07	Poorly soluble	High	No	Yes	No	No	Yes	No	Yes	-4.54	0	0	0	0	1	0.55	0	1	2	4.72
Tricyclene	COc1cc(O)cc(c1CC=Cc1ccccc1)O	C16H16O3	256.3	19	12	0.12	4	3	2	76.37	49.69	2.71	3.75	3.25	2.76	3.46	3.19	-3.99	0.0259	0.000101	Soluble	-4.49	0.00837	3.27e-05	Moderately soluble	-4.39	0.0104	4.06e-05	Moderately soluble	High	Yes	No	Yes	Yes	Yes	Yes	Yes	-5.2	0	0	0	0	0	0.55	0	0	1	2.56
Tubulosine	C/C=C/C(=O)C1(O)[C@@H](OC(=O)C(=CC)C)[C@@H]2OC(=O)C(=C)C2[C@@H]2[C@H]([C@@H]1C)O2	C20H24O7	376.4	27	0	0.55	5	7	1	95.54	102.43	2.74	1.84	1.26	0.92	2.44	1.84	-3	0.374	0.000993	Soluble	-3.61	0.0921	0.000245	Soluble	-1.47	12.9	0.0343	Soluble	High	No	No	No	No	No	No	No	-7.29	0	0	0	0	0	0.55	0	3	1	5.13
Vincristine sulfate	CCC(C(=O)O[C@H]1[C@@H]2OC(=O)C(=C)C2C[C@H]([C@@H](C1(O)C(=O)CC(O)C)C)O)C	C20H30O8	398.45	28	0	0.75	7	8	3	99.85	130.36	3.61	0.88	0.51	0.3	1.68	1.4	-2.4	1.58	0.00396	Soluble	-3.2	0.25	0.000628	Soluble	-1.52	12	0.0301	Soluble	High	No	Yes	No	No	No	No	Yes	-8.11	0	0	0	0	0	0.55	0	2	1	5.36
Vismin	C/C=C/C(=O)C1(O)[C@@H](OC(=O)C(CC)C)[C@@H]2OC(=O)C(=C)C2CC(=O)[C@@H]1C	C20H26O7	378.42	27	0	0.6	6	7	1	97.25	106.97	2.04	1.74	1.53	0.92	2.85	1.81	-2.89	0.492	0.0013	Soluble	-3.6	0.0944	0.000249	Soluble	-2.44	1.36	0.00361	Soluble	High	No	No	No	No	No	No	No	-7.37	0	0	0	0	0	0.55	0	2	1	5.08
Vismione B	C/C=C/C(=O)C1(O)[C@@H](C)[CH][C@@H](C2[C@H]([C@@H]1OC(=O)C(=CC)C)OC(=O)C2=C)O	C20H25O7	377.41	27	0	0.55	5	7	2	96.68	110.13	0	1.82	1.05	0.92	2.1	1.18	-3	0.38	0.00101	Soluble	-3.75	0.0667	0.000177	Soluble	-1.39	15.5	0.0411	Soluble	High	No	Yes	No	No	No	No	No	-7.31	0	0	0	0	0	0.55	0	2	1	5.08
Vogelin C	O=C(C=Cc1ccc(cc1)O)OCC[C@@]12CC[C@@]3([C@H](C1=CCC1[C@@]2(C)CCC2[C@]1(C)CC[C@@H](C2(C)C)O)[C@@H](C)[C@@H](CC3)C)C(=O)O	C40H56O6	632.87	46	6	0.7	7	6	3	184.25	104.06	4.48	8.78	8.31	5.78	7.03	6.88	-8.93	7.44e-07	1.18e-09	Poorly soluble	-10.85	8.99e-09	1.42e-11	Insoluble	-7.6	1.59e-05	2.51e-08	Poorly soluble	Low	No	No	No	No	No	No	Yes	-3.93	2	4	0	1	2	0.56	0	2	2	6.99
Xenognosin A			0	0	0	0.7	0	6	3	0	0	4.48	8.78	8.31	5.78	7.03	6.88	-8.93	7.44e-07	1.18e-09	Poorly soluble	-10.85	8.99e-09	1.42e-11	Insoluble	-7.6	1.59e-05	2.51e-08	Poorly soluble	Low	No	No	No	No	No	No	Yes	-3.93	2	4	0	1	2	0.56	0	2	2	6.99
7-hydroxycadallin	Oc1ccc2c(c1)n1c(=O)ccc3c1c2ccn3	C14H8N2O2	236.23	18	16	0	0	3	1	69.68	54.6	1.71	2.07	2.14	1.83	2.19	1.99	-3.27	0.128	0.000541	Soluble	-2.85	0.337	0.00143	Soluble	-4.35	0.0105	4.45e-05	Moderately soluble	High	Yes	No	Yes	No	No	No	No	-6.27	0	0	0	0	0	0.55	0	0	1	1.97
3,5,7-trihydroxyflavonol	OC[C@]1(O)[C@@H](O)[C@@]2(O)OC[C@]34[C@@]1(O)[C@@H](O)C(=O)O[C@@H]4C[C@@H]1[C@]([C@@H]23)(C)[C@H](O)[C@@H](O)C=C1C	C20H28O11	444.43	31	0	0.85	1	11	8	98.47	197.37	0	-4.03	-3.87	-2.23	-2.32	-2.49	0.01	454	1.02	Highly soluble	0.49	1360	3.06	Highly soluble	1.5	14100	31.6	Soluble	Low	No	Yes	No	No	No	No	No	-11.87	2	1	1	1	4	0.17	0	1	1	6.27
5,7,3',4'-tetrahydroxyisoflavone	C/C=C/C(=O)C1(O)[C@@H](OC(=O)C(=CC)C)[C@@H]2OC(=O)C(=C)C2[CH][C@H]([C@@H]1C)O	C20H25O7	377.41	27	0	0.55	5	7	2	96.68	110.13	0	1.82	1.05	0.92	2.1	1.18	-3	0.38	0.00101	Soluble	-3.75	0.0667	0.000177	Soluble	-1.39	15.5	0.0411	Soluble	High	No	Yes	No	No	No	No	No	-7.31	0	0	0	0	0	0.55	0	2	1	5.08
Isomucronustyrene	C/C=C/C(=O)C1(O)[C@@H](OC(=O)C(CC)C)[C@@H]2OC(=O)C(=C)C2C[C@H]([C@@H]1C)O	C20H28O7	380.43	27	0	0.65	6	7	2	98.21	110.13	2.82	2.02	1.32	1	2.26	1.88	-3.08	0.32	0.000841	Soluble	-3.96	0.0417	0.00011	Soluble	-1.75	6.81	0.0179	Soluble	High	No	Yes	No	No	No	No	Yes	-7.19	0	0	0	0	0	0.55	0	2	1	5.23
12-Acetoxy-5-hydroxynerolidol	C/C=C/C(=O)C1(O)[C@@H](C)[CH][CH]C2[C@H]([C@@H]1OC(=O)C(=CC)C)OC(=O)C2=C	C20H24O6	360.4	26	0	0.55	5	6	1	94.46	89.9	0	2.79	1.9	1.72	2.97	1.87	-3.5	0.113	0.000315	Soluble	-4.33	0.0167	4.63e-05	Moderately soluble	-2.2	2.26	0.00627	Soluble	High	No	Yes	No	No	No	No	No	-6.52	0	0	0	0	0	0.55	0	2	1	4.84
14,15beta-dihydroxyklaineanone	OC[C@]1(C)[C@@H](O)[C@@H](O)C[C@]2(C1CC[C@@]1(C2CC=C2[C@@]1(C)CC[C@@]1(C2[C@](C)(O)[C@H](CC1)C)C(=O)O)C)C	C30H48O6	504.7	36	0	0.9	2	6	5	140.44	118.22	2.99	4.29	4.15	3.33	3.46	3.64	-5.54	0.00146	2.89e-06	Moderately soluble	-6.49	0.000165	3.27e-07	Poorly soluble	-3.9	0.0634	0.000126	Soluble	High	No	Yes	No	No	No	No	No	-6.33	1	3	0	0	0	0.56	0	1	2	6.73
taiwanin A	CC([C@@H]1CC=C(c2c1cc(C)c(c2)O)C)C	C15H20O	216.32	16	6	0.47	1	1	1	70.41	20.23	2.96	4.05	4.25	3.64	3.97	3.77	-3.94	0.0246	0.000114	Soluble	-4.18	0.0143	6.63e-05	Moderately soluble	-4.06	0.019	8.79e-05	Moderately soluble	High	Yes	No	No	No	No	Yes	No	-4.74	0	0	0	0	1	0.55	0	0	2	3.24
7-methoxy-beta-carboline-1-propionic acid	COc1cc2c(cc1OC)c1CN3CCC[C@H]3Cc1c1c2c(OC)c(OC)cc1	C24H27NO4	393.48	29	14	0.42	4	5	0	119.17	40.16	4.04	4.73	4.02	2.69	4.72	4.04	-5.35	0.00175	4.44e-06	Moderately soluble	-5.3	0.00196	4.98e-06	Moderately soluble	-6.95	4.38e-05	1.11e-07	Poorly soluble	High	Yes	Yes	No	Yes	Yes	Yes	Yes	-5.34	0	0	0	0	0	0.55	0	1	2	3.5
aglycon 14-hydroxyhypocretenolide	C=C1[C@H](O)CC[C@]2(C1C[C@@H](CC2)C(=C)C(=O)O)C	C15H22O3	250.33	18	0	0.67	2	3	2	71.72	57.53	2.14	2.65	2.76	2.47	2.44	2.49	-2.93	0.294	0.00118	Soluble	-3.51	0.0775	0.00031	Soluble	-1.98	2.64	0.0105	Soluble	High	Yes	No	No	No	No	No	No	-5.95	0	0	0	0	0	0.85	0	2	0	3.42
1-methoxyerythrabyssin II	CC1=CC(=O)[C@H]([C@]2([C@H]1C[C@H]1OC(=O)[C@H]([C@@]3([C@]41[C@@H]2[C@@](O)(OC4)[C@@H]([C@@H]3C)O)O)O)C)O	C20H26O9	410.42	29	0	0.8	0	9	5	95.15	153.75	0.1	-1.97	-1.75	-0.8	-0.64	-1.01	-1.14	29.5	0.0719	Very soluble	-0.74	75.4	0.184	Very soluble	-0.14	298	0.726	Soluble	Low	No	Yes	No	No	No	No	No	-10.2	0	1	1	1	1	0.55	0	0	1	6.06
Dalparvinene B	O=C(OCC12CCC3(C(C1=CCC1C2(C)CCC2C1(C)CCC(C2(C)C)O)C(C)C(CC3)C)C(=O)O)/C=C/c1ccc(cc1)O	C39H54O6	618.84	45	6	0.69	6	6	3	179.45	104.06	4.35	8.24	7.92	5.61	6.61	6.54	-8.57	1.66e-06	2.69e-09	Poorly soluble	-10.29	3.2e-08	5.16e-11	Insoluble	-7.21	3.77e-05	6.1e-08	Poorly soluble	Low	No	Yes	No	No	No	No	Yes	-4.22	2	4	0	1	2	0.56	0	2	2	6.96
(1S,5S,6R,7R,8R,9S,10S)-5-Angeloyloxy-8,9-epoxy-1-hydroxy-2-oxoxantha-3,11-dien-6,12-olide	CCCCCC/C=C/CCCCCCCc1cc(O)cc(c1)O	C21H34O2	318.49	23	6	0.62	13	2	2	102.28	40.46	4.52	8.12	6.51	4.79	6.56	6.1	-6.27	0.000173	5.43e-07	Poorly soluble	-8.83	4.74e-07	1.49e-09	Poorly soluble	-6.56	8.75e-05	2.75e-07	Poorly soluble	High	No	No	Yes	Yes	No	Yes	No	-2.48	1	1	1	1	1	0.55	0	1	2	2.91
(1S,5S,6R,7S,9R,10S)-5-Methylbutanoyloxy-1,4,9-trihydroxy-2-oxoxanth-11-en-6,12-olide	COc1cc2OC(C)(C)C=Cc2c(c1C(=O)/C=C/c1ccc(cc1)O)O	C21H20O5	352.38	26	12	0.19	4	5	2	100.91	75.99	2.98	4.43	3.97	1.97	3.99	3.47	-4.89	0.00451	1.28e-05	Moderately soluble	-5.74	0.000635	1.8e-06	Moderately soluble	-4.75	0.00619	1.76e-05	Moderately soluble	High	Yes	No	Yes	Yes	Yes	No	Yes	-5.3	0	0	0	0	0	0.55	0	1	2	3.71
9-Oxo-seco-ratiferolide-5-alpha-O-(2-methylbutyrate)	C=CCCCCCC=C[C@@H](C#CC#CCC=C)O	C17H22O	242.36	18	0	0.41	8	1	1	79.9	20.23	4.19	4.97	3.78	4.17	5.08	4.44	-3.95	0.0275	0.000113	Soluble	-5.13	0.00178	7.36e-06	Moderately soluble	-2.94	0.28	0.00116	Soluble	High	Yes	No	Yes	No	Yes	No	No	-4.25	1	0	0	0	1	0.55	0	2	3	4.27
(1S,5S,6R,7R,8S,10S)-5-Angeloyloxy-1,8-dihydroxy-2-oxoxantha-3,11-dien-6,12-olide	O=C(OC[C@@]12CC[C@@]3([C@H](C1=CC[C@H]1[C@@]2(C)CC[C@@H]2[C@]1(C)CC[C@@H](C2(C)C)O)CC(CC3)(C)C)C(=O)O)/C=C/c1ccc(cc1)O	C39H54O6	618.84	45	6	0.69	6	6	3	179.19	104.06	4.5	8.38	8.07	5.61	7	6.71	-8.66	1.36e-06	2.19e-09	Poorly soluble	-10.43	2.29e-08	3.69e-11	Insoluble	-7.66	1.34e-05	2.17e-08	Poorly soluble	Low	No	No	No	No	No	No	Yes	-4.13	2	4	0	1	2	0.56	0	2	2	6.83
3beta-Hydroxy-27-p-(Z)-coumaroyloxyurs-12-en-28-oic acid	CCCCCC=CCC=CCCCCCCCc1cc(O)cc(c1)O	C23H36O2	344.53	25	6	0.57	14	2	2	111.42	40.46	4.66	8.51	7.06	5.13	7.23	6.52	-6.59	8.84e-05	2.56e-07	Poorly soluble	-9.23	2.02e-07	5.87e-10	Poorly soluble	-6.64	7.97e-05	2.31e-07	Poorly soluble	Low	No	No	Yes	Yes	No	Yes	No	-2.36	1	1	1	1	1	0.55	0	1	2	3.16
(1S,5S,6R,7S,10R)-1-Hydroxy-4-methoxy-5-methylbutanoyloxy-2,9-dioxoxanth-11-en-6,12-olide	COc1ccc(c(c1O)OC)C1COc2c(C1=O)c(O)cc(c2)O	C17H16O7	332.3	24	12	0.24	3	7	3	84.55	105.45	2.26	2.5	2.18	0.13	2.13	1.84	-3.65	0.0749	0.000225	Soluble	-4.36	0.0145	4.37e-05	Moderately soluble	-3.65	0.0751	0.000226	Soluble	High	No	Yes	Yes	No	No	No	Yes	-6.55	0	0	0	0	0	0.55	0	0	0	3.51
9-hydroxycanthin-6-one	CC1=CC(=O)[C@H]([C@]2(C1C[C@H]1OC(=O)[C@@H]3[C@]1([C@]2(C)[C@@H](O)[C@@H]([C@@H]3C)O)C)C)O	C20H28O6	364.43	26	0	0.8	0	6	3	93.51	104.06	1.84	0.81	0.83	1.16	1.28	1.18	-2.61	0.895	0.00246	Soluble	-2.58	0.965	0.00265	Soluble	-1.82	5.5	0.0151	Soluble	High	No	Yes	No	No	No	No	No	-7.95	0	0	0	0	0	0.55	0	0	1	5.34
13beta, 21-Dihydroxyeurycomanol	COC1C2CC3C4(C1C(=O)c1c(O4)c(CC=C(C)C)c4c(c1O)C=CC(O4)(C)CCC=C(C)C)C(C2=O)(C/C=C(\C(=O)O)/C)OC3(C)C	C39H48O9	660.79	48	6	0.56	9	9	2	183.98	128.59	5	6.94	6.84	2.74	7.52	5.81	-7.81	1.03e-05	1.56e-08	Poorly soluble	-9.45	2.33e-07	3.52e-10	Poorly soluble	-7.08	5.5e-05	8.32e-08	Poorly soluble	Low	No	Yes	No	No	No	No	Yes	-5.4	1	4	0	1	2	0.56	0	2	3	8.05
9-alpha-Hydroxy-seco-ratiferolide-5-alpha-O-angelate	COCc1c2OC(=O)c3c(Oc2c(c(c1O)C(=O)O)C)c(C=O)c(cc3C)O	C19H16O9	388.32	28	12	0.21	4	9	3	95.1	139.59	1.72	2.7	2.54	0.23	2.96	2.03	-4	0.0387	9.96e-05	Moderately soluble	-5.28	0.00202	5.2e-06	Moderately soluble	-3.97	0.0418	0.000108	Soluble	Low	No	Yes	No	No	Yes	No	No	-6.75	0	0	0	1	0	0.56	0	2	1	3.6
9-alpha-Hydroxy-seco-ratiferolide-5-alpha-O-(2-methylbutyrate)	CC[C@H]1CN2CCc3c([C@H]2C[C@H]1C[C]1[N][CH][CH]c2c1[nH]c1c2cc(cc1)O)cc(c(c3)OC)OC	C29H33N3O3	471.59	35	15	0.52	5	5	2	143.7	57.72	0	4.61	3.52	2.88	4.89	3.18	-5.66	0.00104	2.21e-06	Moderately soluble	-5.55	0.00134	2.84e-06	Moderately soluble	-7.76	8.18e-06	1.73e-08	Poorly soluble	High	Yes	Yes	No	No	No	No	Yes	-5.9	0	1	0	0	0	0.55	0	0	2	4.79
(1S,5S,6R,7S,10S)-5-Angeloyloxy-1-hydroxy-2-oxoxantha-3,11-dien-6,12-olide	COc1c(O)c2nccc3c2n(c1=O)c1ccccc31	C15H10N2O3	266.25	20	16	0.07	1	4	1	76.18	63.83	2.14	1.97	2.15	1.53	2.2	2	-3.26	0.147	0.000552	Soluble	-2.94	0.309	0.00116	Soluble	-4.47	0.00892	3.35e-05	Moderately soluble	High	Yes	No	Yes	No	No	Yes	Yes	-6.53	0	0	0	0	0	0.55	0	0	0	2.37
2-alpha, 3-alpha, 19-beta, 23-beta-tetrahydroxyurs-12-en-28-oic acid	C=C1C[C@@]23C[C@H]1CC[C@H]3[C@]1([C@H](CC2)[C@](C)(CCC1)C(=O)O)C	C20H30O2	302.45	22	0	0.85	1	2	1	90.32	37.3	2.41	5.43	5.04	4.63	4.33	4.37	-5.07	0.00257	8.51e-06	Moderately soluble	-5.97	0.000325	1.07e-06	Moderately soluble	-4.11	0.0233	7.71e-05	Moderately soluble	High	Yes	No	No	No	Yes	No	No	-4.29	1	0	0	0	1	0.85	0	1	1	4.91
